# Supplementary material for: Systematic identification of cancer cell vulnerabilities to natural killer cell-mediated immune surveillance
Source: eLife. 2019 Aug 27;8:e47362. doi: 10.7554/eLife.47362 (PMC6713475; doi:10.7554/eLife.47362)
Supplement: Supplementary file 5. [file elife-47362-supp5.xls]

## Sheet: HAPfcTab
Gene	Protein	Est_Fc2	Var_2	LL95_2	UL95_2	p_null	cv	mean_over_cv
DCAF15	sp|Q66K64|DCA15-HUMAN	7.28177	0.05721	6.81706	7.74695	2.53e-152	0.0328473	221.686
DDA1	sp|Q9BW61|DDA1-HUMAN	4.61405	0.0207952	4.33397	4.903	6.49e-139	0.0312535	147.633
	tr|Q59GV0|Q59GV0-HUMAN	2.75073	0.012229	2.53377	2.96919	9.42e-57	0.040202	68.4227
PCCA	sp|P05165|PCCA-HUMAN	2.39129	0.00856505	2.21526	2.57264	2.22e-51	0.0387019	61.7873
ACACA	sp|Q13085-4|ACACA-HUMAN	1.4004	0.00162677	1.31945	1.48065	1.58e-23	0.0288012	48.6229
MCCC2	sp|Q9HCC0|MCCB-HUMAN	1.81149	0.00547356	1.66605	1.95798	2.71e-28	0.0408412	44.3544
DDB1	sp|Q16531|DDB1-HUMAN	2.28237	0.0190729	2.00919	2.55217	8.05e-21	0.0605093	37.7193
PC	tr|A0A024R5C5|A0A024R5C5-HUMAN	1.41699	0.00307274	1.31035	1.5267	2.69e-14	0.0391198	36.2219
CUL4A	sp|Q13619|CUL4A-HUMAN	1.92586	0.0118274	1.71149	2.14081	8.45e-18	0.0564703	34.104
ZNF384	sp|Q8TF68|ZN384-HUMAN	2.66518	0.053473	2.21319	3.12191	2.99e-13	0.0867642	30.7175
MID1IP1	sp|Q9NPA3|M1IP1-HUMAN	1.71382	0.00979461	1.51636	1.91066	2.74e-13	0.0577469	29.6782
MCCC1	sp|Q96RQ3|MCCA-HUMAN	1.35468	0.0043571	1.22412	1.48474	3.87e-08	0.0487261	27.8019
PAPD4	sp|Q6PIY7|GLD2-HUMAN	1.32266	0.00492187	1.18219	1.45946	2.12082e-06	0.0530416	24.9363
DDIT4	tr|A0A024QZQ6|A0A024QZQ6-HUMAN	1.54524	0.00974195	1.34889	1.73591	1.66e-08	0.0638744	24.1918
ACACB	sp|O00763|ACACB-HUMAN	1.74827	0.0164669	1.49432	1.99782	2.75e-09	0.0734002	23.8183
	tr|Q59EF9|Q59EF9-HUMAN	1.43223	0.00764037	1.25929	1.60416	3.81e-07	0.0610301	23.4676
UBR5	sp|O95071|UBR5-HUMAN	1.38449	0.00694819	1.224	1.54859	1.98797e-06	0.0602069	22.9956
WBSCR22	sp|O43709-3|WBS22-HUMAN	1.20363	0.00539048	1.0595	1.34788	0.00277285	0.0609987	19.7321
RTEL1	sp|Q9NZ71-2|RTEL1-HUMAN	1.61111	0.0178034	1.35183	1.86974	2.32459e-06	0.0828183	19.4536
SMC1A	sp|Q14683|SMC1A-HUMAN	1.25622	0.00685563	1.09452	1.41961	0.000985752	0.065911	19.0593
SMC3	sp|Q9UQE7|SMC3-HUMAN	1.46602	0.0143548	1.23222	1.69992	5.02029e-05	0.0817257	17.9383
POLR2G	sp|P62487|RPB7-HUMAN	1.55058	0.0193401	1.28079	1.83029	3.76241e-05	0.0896882	17.2886
CUL4B	sp|Q13620|CUL4B-HUMAN	1.30073	0.00991981	1.10932	1.49369	0.00126625	0.076571	16.9872
MGA	sp|Q8IWI9-4|MGAP-HUMAN	1.39958	0.0138116	1.17521	1.62925	0.000336902	0.08397	16.6676
WSB1	tr|A0A024QZ51|A0A024QZ51-HUMAN	1.3397	0.0123089	1.12497	1.55922	0.00109982	0.0828137	16.1773
ZRANB3	sp|Q5FWF4|ZRAB3-HUMAN	1.38324	0.0143028	1.14795	1.6219	0.000676486	0.0864596	15.9987
HUWE1	tr|A0A024R9W5|A0A024R9W5-HUMAN	1.0541	0.00490013	0.916783	1.19217	0.219806	0.0664082	15.873
	tr|A1XPJ0|A1XPJ0-HUMAN	1.36041	0.0143163	1.13127	1.59953	0.00129688	0.087952	15.4676
HSF2	sp|Q03933|HSF2-HUMAN	1.18374	0.00878718	1.00063	1.36925	0.0249919	0.0791897	14.9482
SQSTM1	sp|Q13501|SQSTM-HUMAN	1.40945	0.0180647	1.14492	1.674	0.00115804	0.0953599	14.7803
ZNF430	sp|Q9H8G1|ZN430-HUMAN	1.52193	0.0256091	1.19839	1.84589	0.000554156	0.105148	14.4741
UXT	tr|A0A0C4DFR8|A0A0C4DFR8-HUMAN	1.39128	0.0181043	1.12666	1.66125	0.00181865	0.0967111	14.3859
STIL	sp|Q15468|STIL-HUMAN	1.1321	0.00804605	0.956014	1.30612	0.0704173	0.0792331	14.2882
CBFA2T3	sp|O75081|MTG16-HUMAN	1.30475	0.0143344	1.07454	1.5403	0.00545782	0.0917619	14.2189
ZNF24	tr|A0A024RC47|A0A024RC47-HUMAN	2.05542	0.0887129	1.47822	2.61614	0.00019743	0.144908	14.1843
CEP162	sp|Q5TB80|CE162-HUMAN	1.85382	0.0634923	1.41039	2.30226	0.000351397	0.135923	13.6388
	tr|Q59EL2|Q59EL2-HUMAN	1.16036	0.0100422	0.965744	1.35923	0.0547741	0.0863618	13.436
TONSL	sp|Q96HA7|TONSL-HUMAN	1.35874	0.0189158	1.08148	1.62702	0.00454887	0.101222	13.4233
SS18L2	sp|Q9UHA2|S18L2-HUMAN	1.30724	0.0166233	1.05771	1.56527	0.00858672	0.0986287	13.2542
MRPL37	sp|Q9BZE1|RM37-HUMAN	1.16567	0.0105925	0.96287	1.36239	0.0537318	0.0882925	13.2024
PHF14	tr|A0A0U1RRH6|A0A0U1RRH6-HUMAN	1.86135	0.0701066	1.36295	2.35361	0.000570725	0.14225	13.0851
NQO1	sp|P15559-3|NQO1-HUMAN	1.2464	0.014235	1.00901	1.48107	0.0194521	0.0957241	13.0208
JRK	tr|Q86XJ5|Q86XJ5-HUMAN	1.29314	0.0166239	1.03546	1.55263	0.0114959	0.0997059	12.9695
	tr|B3KPJ8|B3KPJ8-HUMAN	1.27593	0.0157966	1.03031	1.52851	0.0140668	0.0985042	12.953
	tr|E9KL35|E9KL35-HUMAN	1.25239	0.0154096	1.00643	1.49372	0.021017	0.0991188	12.6352
WRN	sp|Q14191|WRN-HUMAN	1.10452	0.00950033	0.913118	1.29502	0.141785	0.0882461	12.5164
FOXM1	sp|Q08050|FOXM1-HUMAN	1.47802	0.0307415	1.13668	1.82793	0.00320184	0.118627	12.4594
CRAMP1	sp|Q96RY5|CRML-HUMAN	1.77151	0.0636655	1.25913	2.28565	0.00111535	0.142432	12.4376
	tr|A0A140VK69|A0A140VK69-HUMAN	1.0862	0.00926595	0.892227	1.27559	0.185262	0.0886207	12.2567
PSMB3	sp|P49720|PSB3-HUMAN	1.48727	0.0326964	1.13637	1.85188	0.00352199	0.121579	12.2329
SAT1	sp|P21673|SAT1-HUMAN	1.55638	0.0392857	1.15194	1.94911	0.00249967	0.127351	12.2212
	tr|A0A140VK45|A0A140VK45-HUMAN	1.19777	0.0138134	0.964451	1.42732	0.0462153	0.0981244	12.2067
TRAF4	sp|Q9BUZ4|TRAF4-HUMAN	1.26082	0.017087	1.00655	1.52563	0.0230051	0.103676	12.1611
STK19	sp|P49842|STK19-HUMAN	1.6483	0.050302	1.20931	2.1129	0.00192272	0.136068	12.1138
HMG20A	sp|Q9NP66|HM20A-HUMAN	1.35036	0.0228484	1.05216	1.65452	0.0102285	0.111938	12.0634
44M2.3	sp|Q96IC2|REXON-HUMAN	1.6421	0.0502444	1.19166	2.0759	0.00208791	0.136504	12.0297
CDC45	sp|O75419-3|CDC45-HUMAN	1.22674	0.0157377	0.982667	1.47639	0.0353489	0.102263	11.9959
	tr|Q6ZNE2|Q6ZNE2-HUMAN	1.59081	0.0450017	1.15747	2.01761	0.00267595	0.133351	11.9295
BRCA2	sp|P51587|BRCA2-HUMAN	0.996714	0.00696511	0.837434	1.1619	0.515704	0.0837324	11.9036
DEDD2	sp|Q8WXF8|DEDD2-HUMAN	1.55127	0.0417998	1.14416	1.95667	0.00350513	0.131795	11.7703
CRY2	tr|A0A0D2X7Z3|A0A0D2X7Z3-HUMAN	1.47982	0.0350197	1.1085	1.84673	0.00517332	0.126458	11.702
UTP6	sp|Q9NYH9|UTP6-HUMAN	1.20621	0.0158503	0.957638	1.45196	0.0507199	0.104375	11.5565
ZMYM6	sp|O95789|ZMYM6-HUMAN	1.20349	0.015734	0.95772	1.44504	0.0523726	0.104226	11.5469
PRKDC	sp|P78527|PRKDC-HUMAN	0.735805	0.00229393	0.640723	0.832228	1	0.065092	11.3041
LRRC42	sp|Q9Y546|LRC42-HUMAN	1.73903	0.0720658	1.20609	2.25787	0.0029531	0.154368	11.2655
BCL2L12	sp|Q9HB09|B2L12-HUMAN	1.36053	0.0270074	1.03024	1.68756	0.0141244	0.120791	11.2635
USP54	sp|Q70EL1|UBP54-HUMAN	1.24856	0.019236	0.976066	1.52047	0.0365546	0.111083	11.2399
GON4L	sp|Q3T8J9|GON4L-HUMAN	1.12518	0.012944	0.904757	1.35141	0.135606	0.101114	11.1278
	tr|B4DNW0|B4DNW0-HUMAN	1.31633	0.0247822	1.01421	1.63253	0.0222464	0.119593	11.0068
GMPPA	sp|Q96IJ6-2|GMPPA-HUMAN	1.2381	0.0194282	0.969222	1.51431	0.043798	0.11258	10.9975
SPATC1L	sp|Q9H0A9|SPC1L-HUMAN	1.68255	0.0668218	1.15193	2.20032	0.00413999	0.153635	10.9516
DCAF4	sp|Q8WV16|DCAF4-HUMAN	1.44671	0.0366342	1.0637	1.81988	0.00980047	0.132301	10.935
ZNF385A	sp|Q96PM9|Z385A-HUMAN	1.40214	0.0326658	1.03643	1.76508	0.0130405	0.128901	10.8777
	tr|G3V3G9|G3V3G9-HUMAN	1.51293	0.04451	1.08858	1.89431	0.00752345	0.139447	10.8495
PTS	sp|Q03393|PTPS-HUMAN	1.26189	0.0215633	0.968954	1.55732	0.0372564	0.116369	10.8439
COMMD4	sp|Q9H0A8|COMD4-HUMAN	1.25534	0.0211414	0.974413	1.54538	0.0395347	0.115826	10.8382
MIIP	sp|Q5JXC2|MIIP-HUMAN	1.61382	0.0580999	1.11023	2.0912	0.00543958	0.149359	10.8049
DDX20	tr|Q8IYV2|Q8IYV2-HUMAN	0.908904	0.00587029	0.760233	1.06456	0.882774	0.0842969	10.7822
RFWD3	sp|Q6PCD5|RFWD3-HUMAN	1.13262	0.0145286	0.889974	1.37388	0.135608	0.106421	10.6428
	tr|A8K1Y7|A8K1Y7-HUMAN	1.18512	0.0174689	0.925347	1.44921	0.0806638	0.111525	10.6265
POLK	tr|A0A024RAP4|A0A024RAP4-HUMAN	1.08088	0.0123691	0.866143	1.30068	0.233542	0.102894	10.5048
PANK2	sp|Q9BZ23|PANK2-HUMAN	1.63539	0.0653712	1.12256	2.11965	0.00647541	0.156341	10.4604
DBT	sp|P11182|ODB2-HUMAN	3.27447	1.06316	1.21785	5.27001	0.0136794	0.31489	10.3988
KNL1	sp|Q8NG31-2|KNL1-HUMAN	0.725584	0.00256673	0.624685	0.8244	1	0.0698236	10.3917
HAX1	sp|O00165-2|HAX1-HUMAN	1.17943	0.0182048	0.907288	1.44645	0.0917841	0.114399	10.3098
C19orf47	sp|Q8N9M1|CS047-HUMAN	0.882636	0.00577741	0.729952	1.03203	0.938715	0.0861162	10.2494
MLF2	tr|Q5U0N1|Q5U0N1-HUMAN	1.94026	0.135132	1.19599	2.68413	0.00526663	0.189461	10.241
DOCK2	sp|Q92608|DOCK2-HUMAN	1.27497	0.0252302	0.952828	1.59479	0.041716	0.124583	10.2339
TRIP13	sp|Q15645|PCH2-HUMAN	0.868858	0.00545315	0.727194	1.01151	0.962125	0.0849914	10.2229
MTR	tr|B7ZLW8|B7ZLW8-HUMAN	1.14317	0.016466	0.899084	1.3992	0.132269	0.112249	10.1842
NBR1	sp|Q14596|NBR1-HUMAN	1.37148	0.034146	1.00031	1.73937	0.0221986	0.134735	10.1791
NUP205	sp|Q92621|NU205-HUMAN	0.818263	0.00432835	0.689628	0.947132	0.997131	0.0804023	10.1771
DCAF4L2	sp|Q8NA75|DC4L2-HUMAN	1.57897	0.0608562	1.05441	2.05301	0.00946392	0.156235	10.1064
MCM7	sp|P33993|MCM7-HUMAN	1.24428	0.0235803	0.939277	1.54741	0.0558283	0.123412	10.0823
BIRC6	sp|Q9NR09|BIRC6-HUMAN	0.966605	0.00873546	0.781791	1.14939	0.639568	0.0966927	9.99667
UHMK1	sp|Q8TAS1|UHMK1-HUMAN	1.4946	0.0503914	1.02417	1.94109	0.0137864	0.150194	9.95111
TOR3A	sp|Q9H497|TOR3A-HUMAN	1.5159	0.0535678	1.06808	1.99812	0.0129063	0.15268	9.92863
MRPL4	tr|X6RAY8|X6RAY8-HUMAN	1.07857	0.0138332	0.843519	1.32058	0.252057	0.109047	9.89089
CIB1	sp|Q99828-2|CIB1-HUMAN	1.53794	0.0572072	1.07637	2.00357	0.0122531	0.15552	9.88902
MAGED1	sp|Q9Y5V3-2|MAGD1-HUMAN	1.24846	0.0249048	0.942477	1.56365	0.0576976	0.126406	9.87661
KLHL26	sp|Q53HC5|KLH26-HUMAN	1.06262	0.0131924	0.828776	1.29166	0.29281	0.10809	9.83092
DBF4B	sp|Q8NFT6-3|DBF4B-HUMAN	1.50744	0.0547695	1.02514	1.97433	0.0150687	0.155249	9.70981
MRPL48	sp|Q96GC5|RM48-HUMAN	1.12619	0.0171792	0.858711	1.39277	0.167831	0.116383	9.67658
QTRT1	tr|B2RAR3|B2RAR3-HUMAN	1.4842	0.0519182	1.02344	1.92493	0.0167921	0.153521	9.66774
feat	tr|C4B4C6|C4B4C6-HUMAN	0.983366	0.0103056	0.785323	1.18708	0.565077	0.103234	9.52563
NCKAP5L	sp|Q9HCH0|NCK5L-HUMAN	1.08922	0.0155307	0.83536	1.3302	0.237019	0.114414	9.51997
	tr|A8K2S5|A8K2S5-HUMAN	1.40981	0.0439465	1.00233	1.84585	0.0252985	0.148697	9.48111
OBSCN	tr|A6NGQ3|A6NGQ3-HUMAN	1.64213	0.0832997	1.09505	2.21705	0.0130456	0.175758	9.34315
PLEC	sp|Q15149|PLEC-HUMAN	0.660044	0.00219332	0.567086	0.751206	1	0.0709542	9.30239
WDR18	sp|Q9BV38|WDR18-HUMAN	1.13413	0.0191214	0.859355	1.40685	0.166026	0.121926	9.30178
RAD21	tr|A0A024R9J0|A0A024R9J0-HUMAN	1.16518	0.0213841	0.879547	1.45051	0.129329	0.125503	9.28412
DCAF16	sp|Q9NXF7|DCA16-HUMAN	1.1573	0.0209117	0.872938	1.44513	0.13835	0.124954	9.26184
	tr|B2RD09|B2RD09-HUMAN	1.03439	0.0133916	0.809949	1.26518	0.383165	0.111875	9.24597
HEL-S-29	tr|V9HWH2|V9HWH2-HUMAN	1.5424	0.067086	1.12113	1.98095	0.0181242	0.167926	9.18498
	tr|Q14473|Q14473-HUMAN	1.43072	0.049876	0.968099	1.86565	0.0268883	0.156096	9.16565
CENPN	sp|Q96H22-3|CENPN-HUMAN	1.51468	0.0627597	1.01505	2.04092	0.0199658	0.165394	9.15802
DTL	sp|Q9NZJ0|DTL-HUMAN	1.3562	0.0405169	0.957918	1.75548	0.0383967	0.148421	9.13754
VHL	sp|P40337|VHL-HUMAN	1.47959	0.058028	1.00382	1.94641	0.0232455	0.162809	9.08791
KIAA1586	sp|Q9HCI6|K1586-HUMAN	1.47824	0.0582145	1.00846	1.94936	0.0237328	0.163219	9.05679
GTF2IRD1	sp|Q9UHL9-3|GT2D1-HUMAN	1.55958	0.072193	1.00712	2.09094	0.0186419	0.172282	9.05248
TELO2	sp|Q9Y4R8|TELO2-HUMAN	1.22433	0.0274864	0.889982	1.5496	0.0880126	0.135413	9.04145
TOR1AIP2	sp|Q9H496|IFG15-HUMAN	1.41325	0.0488415	0.929838	1.85776	0.0307489	0.156378	9.0374
	tr|A0A140VJM6|A0A140VJM6-HUMAN	1.54966	0.0709228	1.03417	2.06051	0.0195108	0.171853	9.01737
RAD54L2	sp|Q9Y4B4|ARIP4-HUMAN	1.25931	0.0309501	0.904211	1.60814	0.070245	0.139701	9.01435
SNX15	sp|Q9NRS6|SNX15-HUMAN	1.60946	0.0832454	1.0308	2.1817	0.0173284	0.179267	8.97801
FPGS	sp|Q05932|FOLC-HUMAN	1.21925	0.0276027	0.88734	1.53707	0.0934734	0.136265	8.94767
OAT	sp|P04181|OAT-HUMAN	0.944855	0.01	0.748243	1.14184	0.709337	0.105836	8.92751
ACTR2	sp|P61160|ARP2-HUMAN	1.31517	0.0377784	0.937534	1.70578	0.0524528	0.147788	8.89902
MTHFD1	tr|F5H2F4|F5H2F4-HUMAN	0.983371	0.0118187	0.77245	1.19652	0.560786	0.110552	8.89508
EXT2	sp|Q93063-3|EXT2-HUMAN	1.39906	0.0492161	0.95792	1.85129	0.0360246	0.158569	8.82306
TCEAL9	sp|Q9UHQ7|TCAL9-HUMAN	1.41253	0.0516532	0.942495	1.83797	0.0347522	0.160898	8.77903
DCUN1D5	tr|A0A024R3A2|A0A024R3A2-HUMAN	1.37061	0.0458803	0.944957	1.80329	0.0417945	0.156278	8.7703
PIM1	sp|P11309|PIM1-HUMAN	1.37084	0.0459148	0.950093	1.79785	0.0417568	0.156311	8.76995
POLE1	tr|Q9Y5S5|Q9Y5S5-HUMAN	0.877694	0.00776868	0.707329	1.05492	0.917375	0.100422	8.74002
ZNF518B	sp|Q9C0D4|Z518B-HUMAN	1.29222	0.0366359	0.907775	1.67479	0.0634166	0.148121	8.72408
NOC4L	sp|Q9BVI4|NOC4L-HUMAN	1.13722	0.0220502	0.841644	1.42912	0.177721	0.130576	8.70929
TRAIP	sp|Q9BWF2|TRAIP-HUMAN	1.39768	0.0503344	0.919178	1.85474	0.0381507	0.160518	8.70729
CAD	sp|P27708|PYR1-HUMAN	0.753047	0.00424837	0.624954	0.877012	0.999924	0.0865544	8.70028
COPS6	sp|Q7L5N1|CSN6-HUMAN	1.43038	0.0558515	0.961646	1.89728	0.0342956	0.165221	8.65736
ZBTB40	sp|Q9NUA8|ZBT40-HUMAN	0.982714	0.0124892	0.759349	1.20363	0.561462	0.113721	8.64146
L3HYPDH	sp|Q96EM0|T3HPD-HUMAN	0.985976	0.0126706	0.761555	1.2092	0.549575	0.114165	8.63643
MGA	tr|H3BU53|H3BU53-HUMAN	1.34636	0.0442066	0.923448	1.76851	0.0497437	0.156165	8.62142
ENDOG	sp|Q14249|NUCG-HUMAN	1.2092	0.0288521	0.872904	1.55854	0.109048	0.140472	8.60811
	tr|B3KVT0|B3KVT0-HUMAN	1.5949	0.0874577	1.07825	2.13257	0.0221303	0.185424	8.60138
FAM127A	sp|A6ZKI3|F127A-HUMAN	1.52406	0.0735181	1.00255	2.07557	0.0266313	0.177908	8.56657
NMRAL1	sp|Q9HBL8|NMRL1-HUMAN	1.43723	0.058143	0.938041	1.92757	0.0348955	0.167773	8.56651
ALDH16A1	sp|Q8IZ83|A16A1-HUMAN	1.43711	0.0583276	0.96658	1.9183	0.0351559	0.168053	8.55151
	tr|Q59FT3|Q59FT3-HUMAN	1.09437	0.0196667	0.817005	1.37568	0.250497	0.128145	8.54009
CYP51A1	tr|A0A0C4DFL7|A0A0C4DFL7-HUMAN	1.10391	0.0204599	0.819184	1.38783	0.233782	0.129574	8.51953
	tr|Q53EX0|Q53EX0-HUMAN	1.12668	0.0224921	0.830546	1.4245	0.199144	0.133111	8.4642
	tr|A8K7X9|A8K7X9-HUMAN	1.40721	0.0553456	0.943627	1.86897	0.0417331	0.167179	8.41737
TOR4A	sp|Q9NXH8|TOR4A-HUMAN	1.59898	0.0923641	0.978232	2.21466	0.0243687	0.190068	8.41268
POLR2B	sp|P30876|RPB2-HUMAN	0.803938	0.00591871	0.653517	0.953092	0.99459	0.0956954	8.40101
ATF6	sp|P18850|ATF6A-HUMAN	1.17641	0.0275129	0.844218	1.50884	0.143768	0.140997	8.34352
TDP2	sp|O95551-2|TYDP2-HUMAN	1.24743	0.0350611	0.864921	1.61751	0.0931813	0.150105	8.31036
ZNF670	sp|Q9BS34|ZN670-HUMAN	1.37802	0.0523038	0.91333	1.81611	0.049175	0.165963	8.30318
MCPH1	sp|Q8NEM0|MCPH1-HUMAN	1.32783	0.0453235	0.884641	1.75692	0.0617948	0.160332	8.28177
	tr|Q53FG2|Q53FG2-HUMAN	1.00273	0.0147489	0.759587	1.24692	0.491033	0.121114	8.2792
	tr|E7ENQ6|E7ENQ6-HUMAN	1.30782	0.0430039	0.904971	1.72344	0.0688551	0.158564	8.24787
U2AF1L5	sp|P0DN76|U2AF5-HUMAN	1.07165	0.019389	0.800608	1.35307	0.303429	0.129935	8.24761
NPL	sp|Q9BXD5|NPL-HUMAN	1.6138	0.0998595	0.992852	2.22149	0.0260461	0.195815	8.24147
PRADC1	sp|Q9BSG0|PADC1-HUMAN	1.43953	0.0632695	0.95112	1.91205	0.0402843	0.174734	8.23843
	tr|Q5U0A0|Q5U0A0-HUMAN	1.17089	0.0281161	0.841017	1.49651	0.154065	0.143206	8.17626
SUMO3	tr|A8MU27|A8MU27-HUMAN	1.20739	0.0321828	0.845898	1.5695	0.123831	0.148581	8.12612
KDM4B	tr|F5GX28|F5GX28-HUMAN	1.17177	0.0285671	0.835328	1.49993	0.154748	0.144242	8.12366
GALM	sp|Q96C23|GALM-HUMAN	1.29588	0.0434377	0.87435	1.72166	0.0778544	0.160831	8.05742
ANKRD13	tr|Q3ZTS7|Q3ZTS7-HUMAN	1.16468	0.02852	0.830227	1.49995	0.164746	0.145	8.03227
TEX10	sp|Q9NXF1|TEX10-HUMAN	1.00151	0.0156402	0.760214	1.24323	0.495183	0.124872	8.02028
ZBTB33	sp|Q86T24|KAISO-HUMAN	0.887661	0.00965238	0.695757	1.08026	0.873572	0.11068	8.02005
RNF34	tr|H7BYJ1|H7BYJ1-HUMAN	1.41832	0.0630195	0.919177	1.88709	0.04782	0.176996	8.01329
MYB	sp|P10242-4|MYB-HUMAN	1.44321	0.0676338	0.935604	1.96637	0.0441693	0.180199	8.00898
DNAJC7	sp|Q99615|DNJC7-HUMAN	0.819523	0.00705915	0.651624	0.983719	0.984145	0.102522	7.99367
GTPBP3	sp|Q969Y2-2|GTPB3-HUMAN	1.29567	0.0441092	0.8647	1.7003	0.0795943	0.162095	7.99327
TRIM41	sp|Q8WV44|TRI41-HUMAN	1.63398	0.112193	1.00805	2.31221	0.0291957	0.204992	7.97096
RPL7L1	tr|A0A024RD36|A0A024RD36-HUMAN	1.16749	0.0294786	0.823211	1.51722	0.164652	0.147062	7.93876
HEL-203	tr|V9HVY7|V9HVY7-HUMAN	1.309	0.0466391	0.859416	1.7519	0.0762417	0.164982	7.93422
PRIM1	sp|P49642|PRI1-HUMAN	1.09657	0.0230486	0.795374	1.39178	0.262358	0.138448	7.92046
FANCI	tr|B7ZMF2|B7ZMF2-HUMAN	1.34597	0.0538855	0.878668	1.79047	0.0680597	0.172465	7.80432
TPRKB	sp|Q9Y3C4-3|TPRKB-HUMAN	1.39818	0.0629593	0.891148	1.89072	0.0562677	0.17946	7.79105
VPRBP	sp|Q9Y4B6|VPRBP-HUMAN	1.54578	0.0943516	0.926816	2.16824	0.0377991	0.198713	7.77895
WDR34	sp|Q96EX3|WDR34-HUMAN	1.44589	0.072355	0.911539	1.97638	0.0486938	0.186037	7.77206
	tr|K9MSY5|K9MSY5-HUMAN	1.61313	0.112119	0.956551	2.26656	0.0335425	0.207573	7.7714
	tr|B4DIM6|B4DIM6-HUMAN	1.24703	0.0400825	0.845321	1.63795	0.108624	0.160546	7.76741
DHFR	tr|A0A024RAQ3|A0A024RAQ3-HUMAN	1.41354	0.0665712	0.90374	1.90816	0.0544914	0.18253	7.74414
FEM1A	sp|Q9BSK4|FEM1A-HUMAN	1.5553	0.0979746	0.963659	2.2259	0.0380257	0.201253	7.72808
CDK5RAP2	sp|Q96SN8-2|CK5P2-HUMAN	0.7034	0.00413801	0.577336	0.828494	0.999998	0.091452	7.69146
NUF2	sp|Q9BZD4|NUF2-HUMAN	0.906353	0.0114491	0.698937	1.11573	0.809268	0.118056	7.67731
DEPDC7	sp|Q96QD5|DEPD7-HUMAN	1.52962	0.093965	0.930936	2.16323	0.0420164	0.200401	7.6328
TRIM32	sp|Q13049|TRI32-HUMAN	0.967844	0.0150869	0.725596	1.21513	0.60326	0.12691	7.62624
TRMT44	sp|Q8IYL2|TRM44-HUMAN	1.30422	0.0497712	0.865121	1.7596	0.086341	0.171056	7.62452
DPH6	sp|Q7L8W6|DPH6-HUMAN	1.27764	0.0459556	0.842973	1.71561	0.097638	0.167788	7.61461
2019-09-15	tr|D3DT21|D3DT21-HUMAN	1.2353	0.0403607	0.836437	1.63023	0.120753	0.162632	7.59566
RAD51	sp|Q06609-3|RAD51-HUMAN	1.06445	0.0225134	0.768132	1.36416	0.333766	0.14096	7.55144
	tr|B4DJ36|B4DJ36-HUMAN	1.6758	0.139217	0.915542	2.4176	0.0350531	0.222651	7.52659
XAGE1A	sp|Q9HD64|XAGE1-HUMAN	1.35702	0.0600216	0.840134	1.84365	0.0725215	0.180538	7.51655
NOS3	sp|P29474|NOS3-HUMAN	1.44192	0.0767476	0.867481	1.97765	0.0553354	0.192128	7.50499
NDUFAF1	sp|Q9Y375|CIA30-HUMAN	1.30609	0.0518542	0.859482	1.72023	0.0894452	0.174349	7.49125
DPP7	sp|Q9UHL4|DPP2-HUMAN	1.45064	0.0790258	0.878463	2.03087	0.0544625	0.193787	7.48574
NAA20	sp|P61599|NAA20-HUMAN	1.23933	0.0422041	0.828893	1.65608	0.122013	0.165764	7.47647
VPS29	tr|F8VXU5|F8VXU5-HUMAN	0.915409	0.0125722	0.698211	1.13763	0.774704	0.122487	7.47351
DARS2	tr|A0A024R8Z9|A0A024R8Z9-HUMAN	0.866601	0.0101089	0.666872	1.06696	0.90771	0.11602	7.46941
KDM1A	sp|O60341|KDM1A-HUMAN	1.07836	0.0242372	0.771498	1.37618	0.307366	0.14437	7.46941
TUBG1	sp|P23258|TBG1-HUMAN	0.941278	0.0141098	0.703587	1.17862	0.689473	0.126195	7.45891
LOC389833	tr|Q3SWV3|Q3SWV3-HUMAN	1.27567	0.047684	0.842622	1.73294	0.103399	0.171178	7.4523
	tr|B4DJQ8|B4DJQ8-HUMAN	1.19236	0.0366817	0.801904	1.58567	0.157602	0.160627	7.42318
DNAJB5	sp|O75953-5|DNJB5-HUMAN	1.28329	0.0492782	0.834154	1.71676	0.10095	0.172983	7.4186
SPRTN	sp|Q9H040|SPRTN-HUMAN	1.30152	0.0525172	0.8288	1.78388	0.0941331	0.176076	7.39181
DUS1L	sp|Q6P1R4|DUS1L-HUMAN	1.33586	0.058625	0.845571	1.81746	0.0827012	0.181251	7.37022
TRIM37	sp|O94972|TRI37-HUMAN	1.65367	0.138373	0.938211	2.4044	0.0394378	0.224945	7.35143
FARSA	tr|K7ER00|K7ER00-HUMAN	0.806776	0.00793943	0.635476	0.982735	0.984941	0.110444	7.30485
APEH	tr|C9JIF9|C9JIF9-HUMAN	0.989944	0.0181176	0.722144	1.25176	0.529777	0.135969	7.28066
HMCES	sp|Q96FZ2|HMCES-HUMAN	1.31077	0.0559217	0.855606	1.79347	0.0943958	0.180411	7.26545
GSE1	sp|Q14687|GSE1-HUMAN	0.987061	0.0179967	0.722564	1.25178	0.538419	0.13591	7.26259
NIT1	sp|Q86X76|NIT1-HUMAN	1.27617	0.0504024	0.840432	1.7251	0.109324	0.175921	7.25423
AURKB	sp|Q96GD4-5|AURKB-HUMAN	1.28236	0.0514954	0.826367	1.72688	0.106698	0.17696	7.24662
NMD3	tr|C9JA08|C9JA08-HUMAN	1.0758	0.0256609	0.752762	1.37729	0.31804	0.148903	7.22482
MYL6	tr|B7Z6Z4|B7Z6Z4-HUMAN	1.07573	0.0257602	0.765137	1.40454	0.318521	0.149201	7.20994
HERC4	sp|Q5GLZ8|HERC4-HUMAN	1.107	0.0289482	0.776344	1.4345	0.264711	0.153696	7.20252
COPS4	tr|D6RFN0|D6RFN0-HUMAN	0.831534	0.0092376	0.636878	1.0237	0.960182	0.115584	7.19417
NOP9	sp|Q86U38|NOP9-HUMAN	1.25566	0.0481612	0.802133	1.7094	0.122016	0.174774	7.18448
ARMCX6	sp|Q7L4S7|ARMX6-HUMAN	1.35147	0.0649678	0.828757	1.85873	0.0839597	0.1886	7.16578
MYL12A	tr|J3QRS3|J3QRS3-HUMAN	1.14449	0.0334776	0.776766	1.50489	0.214852	0.159869	7.15891
TSEN34	tr|A0A024R4N9|A0A024R4N9-HUMAN	1.32433	0.0600488	0.822171	1.81922	0.092829	0.185036	7.15715
RAD51C	sp|O43502|RA51C-HUMAN	1.33331	0.061815	0.827714	1.83596	0.0900241	0.186473	7.15015
CHAC1	sp|Q9BUX1|CHAC1-HUMAN	1.36901	0.069218	0.830158	1.88998	0.0803706	0.192178	7.12367
PNMA1	sp|Q8ND90|PNMA1-HUMAN	1.47996	0.0946341	0.879339	2.1058	0.0593559	0.207861	7.11994
BDH2	sp|Q9BUT1|BDH2-HUMAN	1.2716	0.0518496	0.815103	1.7392	0.11648	0.17907	7.10114
	tr|Q53FX4|Q53FX4-HUMAN	1.38264	0.0724839	0.853716	1.95674	0.0776225	0.19472	7.10064
YY1AP1	sp|Q9H869-9|YYAP1-HUMAN	1.33349	0.0628897	0.836999	1.83499	0.0917887	0.188062	7.09071
TRIM27	sp|P14373|TRI27-HUMAN	0.888874	0.0124417	0.665408	1.11289	0.84044	0.125487	7.08338
N4BP2	sp|Q86UW6|N4BP2-HUMAN	0.823531	0.00923413	0.629298	1.0145	0.966852	0.116686	7.05768
HMBS	sp|P08397|HEM3-HUMAN	1.09924	0.0301236	0.752105	1.43691	0.283734	0.157892	6.96196
SPC24	sp|Q8NBT2|SPC24-HUMAN	1.47874	0.0998549	0.856478	2.09877	0.0648851	0.213694	6.91989
EIF6	sp|P56537|IF6-HUMAN	1.00256	0.0211072	0.718542	1.2851	0.492971	0.144912	6.9184
TIMM23B	sp|Q5SRD1|TI23B-HUMAN	1.56012	0.12405	0.901551	2.27665	0.0558821	0.225757	6.91063
RNASEH2A	sp|O75792|RNH2A-HUMAN	1.05021	0.0254865	0.735736	1.36808	0.376567	0.152012	6.90871
	tr|A8K4U2|A8K4U2-HUMAN	1.09026	0.0296345	0.73803	1.42873	0.300028	0.157895	6.90496
	tr|A8K171|A8K171-HUMAN	1.36174	0.0721212	0.82717	1.88322	0.0889914	0.197214	6.90489
TRIM35	sp|Q9UPQ4|TRI35-HUMAN	1.3547	0.0707152	0.809218	1.89869	0.0911276	0.196297	6.90128
VCP	sp|P55072|TERA-HUMAN	0.942764	0.0166793	0.679393	1.19757	0.671182	0.136989	6.88204
MTX2	sp|O75431|MTX2-HUMAN	1.43601	0.0903264	0.824306	2.02523	0.0734264	0.209291	6.86132
ZNF587B	tr|M0QY62|M0QY62-HUMAN	1.25583	0.0530964	0.793781	1.73814	0.133447	0.183485	6.8443
CCDC138	sp|Q96M89|CC138-HUMAN	0.708116	0.00539747	0.561035	0.854639	0.999965	0.103751	6.82517
ZNF77	tr|A8K4L4|A8K4L4-HUMAN	1.33174	0.067624	0.814151	1.86229	0.101031	0.195268	6.82006
UROD	sp|P06132|DCUP-HUMAN	1.43519	0.0912727	0.81143	2.03267	0.0748652	0.210504	6.81786
DLG5	sp|Q8TDM6|DLG5-HUMAN	0.947305	0.0174349	0.68762	1.20855	0.655083	0.139386	6.79626
ARMC6	sp|Q6NXE6|ARMC6-HUMAN	1.21181	0.0468561	0.784465	1.62807	0.163912	0.178628	6.784
RHOBTB3	sp|O94955|RHBT3-HUMAN	1.43639	0.0929188	0.829476	2.04106	0.0761285	0.212217	6.76851
NDUFV1	tr|E5KNH5|E5KNH5-HUMAN	0.929441	0.016298	0.677147	1.1836	0.709764	0.137355	6.76669
MAD2L1	sp|Q13257|MD2L1-HUMAN	1.7056	0.185175	0.842516	2.55831	0.0505326	0.252298	6.76026
LDB1	sp|Q86U70|LDB1-HUMAN	1.23379	0.0511401	0.786683	1.67089	0.15061	0.18329	6.73134
TTC26	sp|A0AVF1|IFT56-HUMAN	0.870513	0.0127075	0.64319	1.09113	0.874654	0.129496	6.72234
ZUFSP	tr|A0A0S2Z644|A0A0S2Z644-HUMAN	1.52345	0.120199	0.944145	2.18887	0.0655449	0.227574	6.69431
MYD88	tr|A0A0A0MST0|A0A0A0MST0-HUMAN	1.14601	0.0386752	0.755977	1.56542	0.228908	0.171604	6.67822
KLHDC8B	sp|Q8IXV7|KLD8B-HUMAN	1.23923	0.0529646	0.759588	1.70813	0.149287	0.185712	6.67284
DHRS3	sp|O75911|DHRS3-HUMAN	1.21128	0.048474	0.773999	1.65206	0.168621	0.181765	6.664
	tr|A0A140VK46|A0A140VK46-HUMAN	1.45682	0.101546	0.81894	2.10093	0.07585	0.218739	6.66009
POMP	sp|Q9Y244|POMP-HUMAN	1.01931	0.0247883	0.707864	1.32814	0.451193	0.15446	6.59917
TTI1	sp|O43156|TTI1-HUMAN	1.12734	0.0372162	0.735253	1.5088	0.2546	0.171124	6.58785
PITHD1	sp|Q9GZP4|PITH1-HUMAN	1.26043	0.0582566	0.776807	1.74032	0.140296	0.191493	6.58211
	tr|B2R8B5|B2R8B5-HUMAN	0.866151	0.0130564	0.637278	1.09582	0.87928	0.131922	6.56562
UMPS	tr|A8K5J1|A8K5J1-HUMAN	1.1266	0.0379413	0.738091	1.51283	0.257863	0.172897	6.51603
ABHD4	sp|Q8TB40|ABHD4-HUMAN	1.37042	0.08337	0.768093	1.92967	0.0997653	0.210694	6.50433
ARHGEF39	sp|Q8N4T4|ARG39-HUMAN	1.31183	0.0701624	0.793467	1.86101	0.11955	0.201918	6.49685
POT1	sp|Q9NUX5|POTE1-HUMAN	1.06132	0.0300905	0.726174	1.39889	0.361857	0.163444	6.49349
CDC6	tr|A0A024R1S2|A0A024R1S2-HUMAN	0.791878	0.00937724	0.597396	0.976805	0.984191	0.122287	6.47559
SPG11	tr|C4B7M4|C4B7M4-HUMAN	0.994447	0.0233653	0.689197	1.2969	0.51449	0.153711	6.4696
MRPL27	sp|Q9P0M9|RM27-HUMAN	1.20884	0.051093	0.753215	1.66216	0.177765	0.186987	6.46483
NLK	tr|A0A024QZ12|A0A024QZ12-HUMAN	1.22034	0.0532593	0.756666	1.66596	0.169849	0.189111	6.45303
PIG59	tr|A8YXX4|A8YXX4-HUMAN	1.10962	0.0364101	0.730765	1.48315	0.28282	0.171964	6.45264
MIDN	sp|Q504T8|MIDN-HUMAN	1.09917	0.0351979	0.741022	1.47804	0.298544	0.170684	6.43978
OGFOD2	sp|Q6N063|OGFD2-HUMAN	1.2892	0.0668418	0.805808	1.80695	0.131656	0.200541	6.4286
ERLIN2	sp|O94905|ERLN2-HUMAN	0.921094	0.0174182	0.651179	1.17909	0.725037	0.143284	6.42845
ATP6V1F	sp|Q16864-2|VATF-HUMAN	1.04459	0.0290945	0.707541	1.38613	0.396886	0.16329	6.39715
FANCB	sp|Q8NB91|FANCB-HUMAN	0.858594	0.0132813	0.631381	1.09113	0.89009	0.134225	6.39669
OSGIN1	sp|Q9UJX0|OSGI1-HUMAN	1.25137	0.0600724	0.785214	1.74104	0.152541	0.195863	6.38902
NPEPPS	sp|P55786|PSA-HUMAN	0.815537	0.0108607	0.615167	1.02327	0.961639	0.127787	6.38202
METTL10	sp|Q5JPI9|MET10-HUMAN	1.28148	0.0663444	0.776204	1.79505	0.137238	0.200997	6.37561
	tr|B4DKQ5|B4DKQ5-HUMAN	1.1462	0.0425106	0.727231	1.57651	0.239136	0.179882	6.37195
	tr|B4DN31|B4DN31-HUMAN	1.59448	0.159497	0.770593	2.40611	0.0683041	0.250471	6.36593
	tr|B4E1V4|B4E1V4-HUMAN	1.20599	0.0523948	0.751864	1.66012	0.184082	0.189802	6.35394
	tr|B3KTJ9|B3KTJ9-HUMAN	0.948766	0.020177	0.667317	1.23244	0.640833	0.149716	6.33709
KLHL18	sp|O94889|KLH18-HUMAN	1.23811	0.0586224	0.755623	1.72071	0.162697	0.195557	6.33121
HMG20B	sp|Q9P0W2|HM20B-HUMAN	0.994121	0.0245416	0.676063	1.30019	0.514968	0.157584	6.30851
ATF6B	sp|Q99941|ATF6B-HUMAN	1.1638	0.0462916	0.730087	1.58286	0.223235	0.184873	6.29514
ASAH2	sp|Q9NR71|ASAH2-HUMAN	1.21481	0.0553176	0.732303	1.6979	0.180537	0.193608	6.27459
PTOV1	sp|Q86YD1|PTOV1-HUMAN	1.26265	0.0649213	0.768548	1.77271	0.151312	0.201795	6.25709
NDUFA8	sp|P51970|NDUA8-HUMAN	1.2513	0.062825	0.735425	1.73261	0.158028	0.200311	6.24679
GMPR2	tr|H0YNJ6|H0YNJ6-HUMAN	1.30208	0.073796	0.812191	1.77358	0.133069	0.208631	6.24107
GTPBP2	tr|A0A024RD30|A0A024RD30-HUMAN	0.846161	0.0132798	0.619794	1.06958	0.909057	0.136189	6.21313
XRCC3	tr|Q53XC8|Q53XC8-HUMAN	1.18699	0.0518891	0.729341	1.65182	0.205857	0.191907	6.18523
RFXANK	sp|O14593-3|RFXK-HUMAN	1.30116	0.0750313	0.751967	1.87352	0.135786	0.210519	6.18074
ZSWIM3	sp|Q96MP5|ZSWM3-HUMAN	1.32312	0.0802681	0.767047	1.86656	0.127041	0.214127	6.17912
PEX6	tr|A0A024RD09|A0A024RD09-HUMAN	0.727882	0.00736606	0.556306	0.902117	0.999239	0.117912	6.17311
XYLB	sp|O75191|XYLB-HUMAN	1.22553	0.0592142	0.749196	1.71622	0.177012	0.198559	6.17213
ZSWIM1	sp|Q9BR11|ZSWM1-HUMAN	1.30336	0.0759538	0.82911	1.75345	0.135506	0.211451	6.16388
CXXC5	sp|Q7LFL8|CXXC5-HUMAN	1.16483	0.0484698	0.700149	1.62112	0.227023	0.189005	6.16296
AIFM2	sp|Q9BRQ8|AIFM2-HUMAN	1.17658	0.0504831	0.734304	1.59033	0.215962	0.190964	6.16127
TRIM4	sp|Q9C037|TRIM4-HUMAN	1.16955	0.0492971	0.722341	1.62727	0.222542	0.189842	6.16066
RBM11	sp|P57052|RBM11-HUMAN	1.24569	0.0635614	0.737522	1.74251	0.164899	0.202389	6.15493
ZNF280A	tr|A0A0G2JN84|A0A0G2JN84-HUMAN	1.02179	0.0288855	0.689261	1.35288	0.448992	0.166333	6.14304
FANCA	sp|O15360|FANCA-HUMAN	1.07493	0.0354632	0.701521	1.45306	0.345354	0.17519	6.1358
MAP3K6	sp|O95382|M3K6-HUMAN	1.31228	0.0788497	0.736177	1.87432	0.133047	0.21398	6.13272
COA1	sp|Q9GZY4|COA1-HUMAN	1.173	0.0504749	0.717192	1.62564	0.220641	0.191531	6.12433
ADNP2	sp|Q6IQ32|ADNP2-HUMAN	1.65652	0.202079	0.804989	2.49642	0.0720829	0.271371	6.10426
GLNC1	tr|A0A1K0GXZ1|A0A1K0GXZ1-HUMAN	1.23439	0.0626134	0.727964	1.73588	0.174454	0.202713	6.08935
CCZ1B	sp|P86790|CCZ1B-HUMAN	0.943256	0.0213677	0.655041	1.23981	0.651061	0.154971	6.08668
RHOXF2	sp|Q9BQY4|RHXF2-HUMAN	1.3049	0.0784503	0.747087	1.86463	0.13817	0.214645	6.07935
CEP95	sp|Q96GE4|CEP95-HUMAN	1.11858	0.0425043	0.706559	1.52246	0.282589	0.18431	6.06901
NUDT22	sp|Q9BRQ3|NUD22-HUMAN	1.23605	0.0633876	0.721921	1.7498	0.174234	0.203688	6.06834
KRIT1	sp|O00522|KRIT1-HUMAN	0.963925	0.0236941	0.648824	1.26703	0.592648	0.15969	6.03624
G2E3	tr|G3V483|G3V483-HUMAN	1.18486	0.0546195	0.7133	1.65866	0.214476	0.197245	6.00704
POLD2	tr|A0A087WWF6|A0A087WWF6-HUMAN	0.960568	0.0237196	0.649704	1.26571	0.601037	0.160334	5.99104
ZBED5	sp|Q49AG3|ZBED5-HUMAN	1.0057	0.0287783	0.659475	1.33812	0.486598	0.16868	5.96217
PTER	sp|Q96BW5|PTER-HUMAN	1.20842	0.0604528	0.711979	1.70713	0.198309	0.203465	5.9392
TRIB3	tr|J3KR25|J3KR25-HUMAN	1.29588	0.0803137	0.730391	1.86318	0.148231	0.218691	5.92563
PDCD2	sp|Q16342|PDCD2-HUMAN	1.342	0.092592	0.738545	1.94694	0.130521	0.226743	5.91859
LAS1L	sp|Q9Y4W2|LAS1L-HUMAN	1.33854	0.0919842	0.754236	1.94134	0.132162	0.226582	5.90753
CDK5RAP1	sp|Q96SZ6-3|CK5P1-HUMAN	0.897829	0.0186959	0.638982	1.17785	0.772538	0.152293	5.89541
ZNF766	tr|G3XAE0|G3XAE0-HUMAN	1.37495	0.103083	0.711396	2.00348	0.121438	0.233511	5.88817
ZNF195	tr|A0A087WT67|A0A087WT67-HUMAN	1.48548	0.140486	0.749761	2.23218	0.0976164	0.252319	5.88731
UTP11	sp|Q9Y3A2|UTP11-HUMAN	0.993747	0.0281555	0.665936	1.32276	0.514863	0.168852	5.88532
DNA2	sp|P51530|DNA2-HUMAN	1.14021	0.0493675	0.712928	1.57961	0.264006	0.194866	5.85126
RPL9	tr|Q53Z07|Q53Z07-HUMAN	0.850554	0.0153009	0.60834	1.09752	0.886508	0.145431	5.84851
ZBTB11	sp|O95625|ZBT11-HUMAN	0.96555	0.0254184	0.649123	1.28586	0.585537	0.16512	5.84757
SIMC1	tr|F6R0L0|F6R0L0-HUMAN	1.12808	0.0474331	0.712196	1.5562	0.278237	0.193064	5.84304
	tr|B4DX61|B4DX61-HUMAN	0.916787	0.0207789	0.632192	1.20586	0.718122	0.157233	5.83077
MUS81	sp|Q96NY9|MUS81-HUMAN	1.34807	0.0977585	0.727581	1.96089	0.132802	0.231934	5.81229
STXBP2	sp|Q15833|STXB2-HUMAN	1.07966	0.0402943	0.684277	1.50486	0.345742	0.185924	5.80701
CKM	sp|P06732|KCRM-HUMAN	1.4155	0.119252	0.743792	2.09761	0.114449	0.243962	5.80212
ETV3	sp|P41162|ETV3-HUMAN	1.02262	0.0325957	0.663595	1.38149	0.450147	0.176549	5.79226
SERPINB5	sp|P36952|SPB5-HUMAN	2.46592	1.10614	0.467938	4.62907	0.0811954	0.426507	5.78166
HIRA	sp|P54198|HIRA-HUMAN	0.838442	0.0147952	0.597921	1.07401	0.907946	0.145073	5.77944
FASTKD1	sp|Q53R41|FAKD1-HUMAN	0.951753	0.0245894	0.648518	1.26506	0.620836	0.164759	5.77663
HECTD3	sp|Q5T447|HECD3-HUMAN	1.05871	0.0377677	0.690555	1.4367	0.381288	0.183562	5.76758
B3GNT2	sp|Q9NY97|B3GN2-HUMAN	1.16754	0.0562314	0.740805	1.61107	0.23993	0.203104	5.74849
ATP1B3	sp|P54709|AT1B3-HUMAN	1.04834	0.0367319	0.668491	1.42344	0.400434	0.182818	5.73433
CPED1	sp|A4D0V7|CPED1-HUMAN	1.26838	0.0787169	0.714747	1.8254	0.169393	0.2212	5.73409
DPM1	tr|H0Y368|H0Y368-HUMAN	1.09053	0.043099	0.673256	1.49888	0.331392	0.190369	5.72851
TTC31	sp|Q49AM3|TTC31-HUMAN	1.29982	0.0871609	0.708938	1.90981	0.154923	0.227132	5.72276
AP3S2	tr|H0YLI7|H0YLI7-HUMAN	1.13347	0.0505293	0.693665	1.58449	0.276336	0.198318	5.71542
C6orf62	sp|Q9GZU0|CF062-HUMAN	1.11467	0.0475198	0.665506	1.5605	0.299433	0.195565	5.69974
BTBD10	sp|Q9BSF8-2|BTBDA-HUMAN	0.852088	0.0162453	0.605973	1.10963	0.877074	0.149582	5.69646
	tr|B3KNC3|B3KNC3-HUMAN	1.28454	0.083986	0.707413	1.84858	0.16309	0.225609	5.69366
HMGCR	sp|P04035-3|HMDH-HUMAN	0.91375	0.0215124	0.618977	1.20581	0.721751	0.160516	5.6926
TRMT2A	tr|F2Z2W7|F2Z2W7-HUMAN	0.919785	0.0221397	0.63268	1.21467	0.705091	0.161771	5.68574
TGFB1	tr|A0A024R0P8|A0A024R0P8-HUMAN	1.32817	0.0967636	0.736615	1.91138	0.145718	0.234208	5.67089
NCAPH2	sp|Q6IBW4-4|CNDH2-HUMAN	0.972487	0.0279672	0.633447	1.30457	0.565338	0.171965	5.65514
PLEKHA3	sp|Q9HB20|PKHA3-HUMAN	1.19623	0.0640515	0.668878	1.69447	0.219065	0.211568	5.65412
FBXO6	sp|Q9NRD1|FBX6-HUMAN	1.17551	0.0600258	0.712827	1.68475	0.236884	0.208422	5.64006
IER5	sp|Q5VY09|IER5-HUMAN	1.23617	0.0737978	0.669311	1.79258	0.192323	0.219757	5.62516
PRR5-ARHGAP8	tr|B1AHC4|B1AHC4-HUMAN	0.851251	0.0167206	0.588404	1.10348	0.874999	0.151904	5.60389
SALL2	sp|Q9Y467|SALL2-HUMAN	1.33127	0.100149	0.709458	1.96958	0.147599	0.237715	5.60027
ZMYM3	tr|A6NHB5|A6NHB5-HUMAN	1.13586	0.0531446	0.671504	1.59387	0.277818	0.202957	5.59655
ITGB3BP	sp|Q13352-5|CENPR-HUMAN	1.24334	0.0763288	0.677707	1.82756	0.189217	0.222205	5.59546
CBFA2T2	sp|O43439-4|MTG8R-HUMAN	1.2055	0.0681254	0.677232	1.72509	0.215544	0.216515	5.56775
ZNF675	sp|Q8TD23|ZN675-HUMAN	1.49575	0.161752	0.68322	2.293	0.108854	0.268885	5.5628
ACD	sp|Q96AP0|ACD-HUMAN	1.5638	0.194123	0.695036	2.4292	0.100337	0.281746	5.5504
ASNA1	sp|O43681|ASNA-HUMAN	1.0908	0.0460939	0.655171	1.52377	0.336175	0.196823	5.54203
RPS17	sp|P08708|RS17-HUMAN	0.695448	0.00765251	0.521391	0.86794	0.999751	0.125787	5.52876
FBXO18	sp|Q8NFZ0-2|FBH1-HUMAN	1.05551	0.0406875	0.651372	1.48468	0.391583	0.191103	5.52324
VDAC2	tr|A0A024QZN9|A0A024QZN9-HUMAN	0.886633	0.0204432	0.60379	1.16929	0.786079	0.161261	5.49811
DCTN4	sp|Q9UJW0|DCTN4-HUMAN	1.06083	0.0419606	0.666057	1.46626	0.383249	0.193097	5.49377
CDC20	sp|Q12834|CDC20-HUMAN	1.08672	0.0463883	0.658719	1.51404	0.343607	0.198192	5.48316
RUNDC1	sp|Q96C34|RUND1-HUMAN	1.18803	0.0664905	0.663193	1.70003	0.232939	0.217046	5.47362
PUSL1	sp|Q8N0Z8|PUSL1-HUMAN	1.16426	0.0613622	0.690089	1.67833	0.253632	0.212765	5.47204
HIPK1	sp|Q86Z02|HIPK1-HUMAN	0.954953	0.0278512	0.626719	1.29032	0.606391	0.174759	5.46439
CAPN15	sp|O75808|CAN15-HUMAN	1.17782	0.0647237	0.657299	1.72043	0.24229	0.215999	5.45288
NKRF	sp|O15226-2|NKRF-HUMAN	0.726345	0.00936366	0.534925	0.912796	0.997658	0.133223	5.45209
PYCR2	sp|Q96C36|P5CR2-HUMAN	0.952532	0.0277562	0.614168	1.27946	0.612147	0.174904	5.44602
GBAS	sp|O75323|NIPS2-HUMAN	1.26683	0.0871458	0.673538	1.8736	0.183029	0.233026	5.43643
ARFIP1	tr|B4E273|B4E273-HUMAN	1.16821	0.0630516	0.670413	1.69997	0.251464	0.214945	5.43493
AMDHD2	sp|Q9Y303-3|NAGA-HUMAN	1.12359	0.0540742	0.662501	1.59961	0.297543	0.20696	5.42901
ZNF407	sp|Q9C0G0|ZN407-HUMAN	1.18204	0.0664842	0.658201	1.68116	0.240093	0.218136	5.41882
SNX3	sp|O60493|SNX3-HUMAN	0.832801	0.0163877	0.579404	1.08459	0.90424	0.153716	5.41781
HSD17B4	sp|P51659|DHB4-HUMAN	0.937495	0.0263903	0.620857	1.26814	0.649793	0.173282	5.41023
FADS1	tr|A0A0A0MR51|A0A0A0MR51-HUMAN	1.10348	0.0507335	0.657893	1.55727	0.322967	0.204119	5.40607
PSMD11	sp|O00231|PSD11-HUMAN	0.691202	0.00781177	0.518251	0.871302	0.999762	0.12787	5.40549
CEP295	sp|Q9C0D2-3|CE295-HUMAN	0.793545	0.0135825	0.566321	1.01958	0.961759	0.146865	5.40323
POLR2C	sp|P19387|RPB3-HUMAN	0.978193	0.0313695	0.634581	1.33817	0.548995	0.181063	5.40251
MCM10	sp|Q7L590|MCM10-HUMAN	0.794369	0.0136488	0.564235	1.02412	0.960806	0.14707	5.40129
MRPL13	sp|Q9BYD1|RM13-HUMAN	0.834703	0.0167265	0.572846	1.09954	0.899392	0.154943	5.38718
MYO19	sp|Q96H55|MYO19-HUMAN	1.22365	0.0777449	0.686975	1.78492	0.211245	0.227866	5.37005
TRAPPC4	sp|Q9Y296|TPPC4-HUMAN	1.14898	0.0608572	0.665931	1.62723	0.272952	0.214706	5.35142
BAG2	sp|O95816|BAG2-HUMAN	1.42017	0.142184	0.684945	2.162	0.132577	0.265513	5.34879
THUMPD2	tr|D6W593|D6W593-HUMAN	1.15288	0.062249	0.661744	1.65649	0.27002	0.216412	5.32724
NEU3	tr|A0A024R5N6|A0A024R5N6-HUMAN	1.34343	0.114833	0.682147	2.01497	0.155421	0.252243	5.32595
CRYZ	sp|Q08257|QOR-HUMAN	1.23742	0.0833755	0.678748	1.82065	0.20547	0.233347	5.30292
ZNF198	tr|A0A024RDS3|A0A024RDS3-HUMAN	0.729256	0.0100598	0.530137	0.93326	0.996527	0.137535	5.30231
TRAPPC1	sp|Q9Y5R8|TPPC1-HUMAN	1.09511	0.0514614	0.626353	1.55943	0.337512	0.207149	5.28658
KCTD9	sp|Q7L273|KCTD9-HUMAN	1.24923	0.087598	0.667209	1.84394	0.199872	0.236922	5.27276
PARPBP	sp|Q9NWS1|PARI-HUMAN	1.13806	0.0603479	0.6542	1.64675	0.287058	0.215857	5.27229
ZBTB9	sp|Q96C00|ZBTB9-HUMAN	1.11855	0.0566107	0.636244	1.58708	0.309152	0.212713	5.2585
HJURP	sp|Q8NCD3|HJURP-HUMAN	1.25093	0.0885886	0.662362	1.82278	0.199595	0.237934	5.25747
ORC6	sp|Q9Y5N6|ORC6-HUMAN	1.27457	0.0954832	0.672945	1.86666	0.187118	0.242437	5.25731
	tr|Q53GX0|Q53GX0-HUMAN	0.744483	0.0111345	0.541602	0.953577	0.992272	0.141736	5.2526
APRT	sp|P07741|APT-HUMAN	1.09686	0.0530285	0.637849	1.56726	0.337016	0.209944	5.22454
PDIK1L	sp|Q8N165|PDK1L-HUMAN	1.11586	0.0568096	0.642664	1.58695	0.313449	0.2136	5.22406
TMEM11	sp|P17152|TMM11-HUMAN	1.28685	0.101103	0.635624	1.92903	0.183492	0.247089	5.20803
EIF2B3	sp|Q9NR50|EI2BG-HUMAN	1.12774	0.0598489	0.639894	1.61746	0.300781	0.21693	5.19864
AMMECR1	tr|A0A0S2Z4X0|A0A0S2Z4X0-HUMAN	1.06336	0.0473817	0.617077	1.48297	0.385496	0.204703	5.19464
EIF3S2	tr|Q5U0F4|Q5U0F4-HUMAN	0.837622	0.0182488	0.574601	1.10211	0.885321	0.161276	5.19373
SYF2	sp|O95926|SYF2-HUMAN	1.41927	0.150827	0.701273	2.12946	0.140165	0.273637	5.18669
MDN1	sp|Q9NU22|MDN1-HUMAN	0.777558	0.0135895	0.542061	1.00454	0.971815	0.149923	5.18637
CHD8	sp|Q9HCK8|CHD8-HUMAN	0.794955	0.0148584	0.553077	1.03785	0.95373	0.153336	5.18441
	tr|Q8WVX7|Q8WVX7-HUMAN	0.688275	0.00839627	0.503195	0.869837	0.999665	0.133132	5.16988
	tr|A8K6L3|A8K6L3-HUMAN	1.26035	0.0949409	0.719896	1.70346	0.199069	0.244476	5.15532
NOL9	sp|Q5SY16|NOL9-HUMAN	1.06735	0.0493825	0.640813	1.50521	0.380916	0.2082	5.12657
GEMIN2	sp|O14893|GEMI2-HUMAN	0.992971	0.0371696	0.605587	1.38069	0.514542	0.194159	5.11422
RNF168	sp|Q8IYW5|RN168-HUMAN	1.09401	0.0551772	0.616888	1.56831	0.344499	0.214713	5.09522
KDM4A	sp|O75164|KDM4A-HUMAN	1.21517	0.0847447	0.6377	1.79613	0.229912	0.239563	5.07245
GINS3	tr|A0A0S2Z5P2|A0A0S2Z5P2-HUMAN	1.08136	0.0532269	0.618092	1.55375	0.362175	0.213351	5.06845
GPS1	sp|Q13098-7|CSN1-HUMAN	1.09991	0.0571409	0.628047	1.58738	0.337988	0.217328	5.06105
PSMD3	sp|O43242|PSMD3-HUMAN	0.730825	0.0111447	0.521986	0.938271	0.99461	0.144451	5.05933
HBG1	tr|D9YZU8|D9YZU8-HUMAN	1.42935	0.163118	0.636144	2.24916	0.143876	0.282561	5.05855
SKI2W	tr|O76046|O76046-HUMAN	1.06977	0.051304	0.63253	1.52147	0.37903	0.211731	5.05249
RAD18	tr|A0A024R2I7|A0A024R2I7-HUMAN	0.71397	0.010223	0.516174	0.911547	0.997665	0.141615	5.04163
MYBL2	sp|P10244|MYBB-HUMAN	1.10594	0.0592371	0.634131	1.58977	0.331682	0.220072	5.02535
NDC80	sp|O14777|NDC80-HUMAN	0.759558	0.0132158	0.529149	0.981615	0.98176	0.151351	5.01851
ZNF473	sp|Q8WTR7|ZN473-HUMAN	1.1406	0.0673077	0.627399	1.62883	0.293929	0.227457	5.01458
NDUFB4	sp|O95168|NDUB4-HUMAN	1.17084	0.0749354	0.58459	1.70055	0.266285	0.233801	5.00785
BCL2L13	tr|A0A087WX97|A0A087WX97-HUMAN	1.04311	0.0472385	0.628422	1.4692	0.421386	0.208362	5.00625
WRNIP1	sp|Q96S55|WRIP1-HUMAN	0.807175	0.0170729	0.551855	1.06191	0.929993	0.161877	4.98634
RNASEH1	sp|O60930|RNH1-HUMAN	1.26516	0.103131	0.624637	1.90429	0.204492	0.253834	4.98421
COPS7B	sp|Q9H9Q2|CSN7B-HUMAN	1.04689	0.0486634	0.611332	1.48287	0.415836	0.210717	4.96822
ASB8	tr|Q6IA19|Q6IA19-HUMAN	1.45611	0.183445	0.622342	2.3124	0.143456	0.294143	4.95034
EIF3F	tr|B3KSH1|B3KSH1-HUMAN	1.08874	0.0574006	0.608831	1.58038	0.355545	0.220056	4.94755
PMPCA	sp|Q10713|MPPA-HUMAN	1.15649	0.0734106	0.632198	1.69855	0.281776	0.234281	4.93633
	tr|E5KMK5|E5KMK5-HUMAN	1.1473	0.0714616	0.627838	1.67379	0.29081	0.233002	4.924
SMC6	sp|Q96SB8|SMC6-HUMAN	1.09883	0.0604751	0.60451	1.58159	0.343885	0.223799	4.9099
CEP72	sp|Q9P209|CEP72-HUMAN	0.886449	0.0257122	0.569962	1.19819	0.760572	0.180891	4.90047
CDC7	sp|O00311|CDC7-HUMAN	0.973699	0.0374319	0.59798	1.36204	0.554066	0.198699	4.90037
ATG101	sp|Q9BSB4|ATGA1-HUMAN	1.03249	0.0474655	0.605906	1.47898	0.440726	0.21101	4.89308
LRRC14	sp|Q15048|LRC14-HUMAN	1.31764	0.126289	0.611901	2.00417	0.185708	0.269703	4.88552
UBL4A	sp|P11441|UBL4A-HUMAN	0.670662	0.0084852	0.490026	0.850017	0.999825	0.13735	4.88288
TAF1C	sp|Q15572|TAF1C-HUMAN	1.27208	0.110005	0.629905	1.90198	0.206013	0.26073	4.87891
IMPA1	sp|P29218-3|IMPA1-HUMAN	0.731092	0.0120371	0.511449	0.955345	0.992877	0.150068	4.87173
DCAF12	sp|Q5T6F0|DCA12-HUMAN	0.892713	0.0267744	0.555864	1.22441	0.743983	0.183294	4.87039
CBX5	sp|P45973|CBX5-HUMAN	0.835333	0.0205529	0.554457	1.11229	0.87464	0.171624	4.86724
MYLIP	sp|Q8WY64|MYLIP-HUMAN	1.26472	0.108162	0.68567	1.78579	0.210435	0.260042	4.86353
ZNF551	sp|Q7Z340|ZN551-HUMAN	1.25106	0.103617	0.654951	1.91509	0.217713	0.257299	4.86229
RAVER1	tr|E9PAU2|E9PAU2-HUMAN	0.659901	0.00802968	0.485316	0.837288	0.999926	0.135791	4.85969
	tr|B7Z852|B7Z852-HUMAN	1.01159	0.0445152	0.594675	1.42109	0.478096	0.208569	4.85015
NAT1	tr|F5H5R8|F5H5R8-HUMAN	1.0932	0.0607907	0.590659	1.56802	0.352714	0.225538	4.84709
AATF	sp|Q9NY61|AATF-HUMAN	1.1852	0.0840059	0.612191	1.76552	0.261419	0.244548	4.8465
USP34	sp|Q70CQ2|UBP34-HUMAN	0.745366	0.0131492	0.518486	0.967856	0.98681	0.153844	4.84495
ARL4A	sp|P40617|ARL4A-HUMAN	1.17248	0.0807313	0.604022	1.74553	0.271912	0.242335	4.83827
TBC1D31	sp|Q96DN5|TBC31-HUMAN	0.624234	0.00650721	0.461521	0.78205	0.999998	0.129226	4.83056
IFT122	sp|Q9HBG6-5|IF122-HUMAN	1.01378	0.0452806	0.577447	1.44296	0.474183	0.2099	4.82982
APPBP2	tr|A0A024QZ47|A0A024QZ47-HUMAN	1.08416	0.0595369	0.567641	1.58027	0.365079	0.225061	4.81719
STARD7	sp|Q9NQZ5|STAR7-HUMAN	1.12956	0.0702815	0.619641	1.69592	0.312524	0.234699	4.8128
POLQ	tr|A0A087WXL3|A0A087WXL3-HUMAN	1.19074	0.0873848	0.634599	1.8151	0.259385	0.248257	4.79641
DCAF5	sp|Q96JK2|DCAF5-HUMAN	0.985928	0.0410889	0.590278	1.4085	0.527673	0.205597	4.79544
SSBP1	tr|Q567R6|Q567R6-HUMAN	1.74059	0.399271	0.563263	2.95554	0.120582	0.363026	4.79467
DNAJA1	sp|P31689|DNJA1-HUMAN	0.63832	0.00723025	0.469413	0.804566	0.999989	0.13321	4.79182
TMEM201	sp|Q5SNT2|TM201-HUMAN	1.65434	0.326455	0.545911	2.80615	0.126056	0.345372	4.79003
ZNF451	sp|Q9Y4E5|ZN451-HUMAN	0.891694	0.0276017	0.562156	1.22448	0.742769	0.186317	4.7859
METTL17	sp|Q9H7H0-3|MET17-HUMAN	1.20502	0.0923502	0.688666	1.80631	0.24995	0.252188	4.77826
NDUFC2	tr|A0A024R5K6|A0A024R5K6-HUMAN	1.70555	0.370765	0.510787	2.96081	0.123281	0.357014	4.77727
TNFAIP1	sp|Q13829|BACD2-HUMAN	0.973291	0.0393564	0.563459	1.38281	0.553549	0.203829	4.77505
	tr|B4DNK0|B4DNK0-HUMAN	1.18406	0.0865598	0.588684	1.77985	0.265787	0.248476	4.76529
EMSY	sp|Q7Z589-7|EMSY-HUMAN	0.6802	0.00943801	0.485004	0.873181	0.999502	0.142825	4.76248
	tr|B2R9C5|B2R9C5-HUMAN	1.03027	0.049686	0.599097	1.47475	0.44599	0.216355	4.76195
PEO1	sp|Q96RR1|PEO1-HUMAN	0.795216	0.0176665	0.534911	1.06758	0.938306	0.167144	4.75768
FANCD2	sp|Q9BXW9-1|FACD2-HUMAN	1.03066	0.0498947	0.589037	1.47547	0.445413	0.216726	4.75558
DSCR3	sp|O14972|DSCR3-HUMAN	1.04666	0.053206	0.611368	1.53218	0.419847	0.220381	4.74931
DNAJC10	sp|Q8IXB1|DJC10-HUMAN	1.06507	0.0570815	0.588735	1.54618	0.392675	0.224321	4.74798
TRIM62	sp|Q9BVG3|TRI62-HUMAN	1.15349	0.079	0.575036	1.71774	0.292501	0.243669	4.73385
SARAF	tr|H0YBH7|H0YBH7-HUMAN	0.861384	0.024619	0.548638	1.16575	0.811501	0.182154	4.72888
BRF2	sp|Q9HAW0|BRF2-HUMAN	1.2249	0.10109	0.573328	1.84715	0.239674	0.259569	4.71897
BBS2	sp|Q9BXC9|BBS2-HUMAN	1.08863	0.0632043	0.594565	1.59033	0.362217	0.230937	4.71398
TNFAIP3	tr|D3TTZ4|D3TTZ4-HUMAN	1.03993	0.0527358	0.589094	1.50611	0.43098	0.220825	4.70929
ARMCX5	sp|Q6P1M9|ARMX5-HUMAN	0.887324	0.028052	0.550404	1.22104	0.749445	0.188756	4.70092
EWSR1	sp|Q01844-5|EWS-HUMAN	0.644273	0.00780923	0.468278	0.816468	0.999972	0.137162	4.69716
CEP152	sp|O94986|CE152-HUMAN	0.566591	0.00467411	0.429	0.703555	1	0.120665	4.69559
PINK1	sp|Q9BXM7|PINK1-HUMAN	1.12562	0.0730083	0.635763	1.71358	0.320997	0.240046	4.68919
STXBP3	sp|O00186|STXB3-HUMAN	0.961463	0.0388875	0.565094	1.34771	0.577469	0.205103	4.6877
NDUFA10	tr|E7ESZ7|E7ESZ7-HUMAN	0.782207	0.0170746	0.525157	1.04202	0.952217	0.167053	4.6824
DNAJC3	sp|Q13217|DNJC3-HUMAN	0.833173	0.0220101	0.542807	1.11879	0.869597	0.178064	4.67907
	tr|Q53FV0|Q53FV0-HUMAN	0.861329	0.0251855	0.551274	1.18025	0.808885	0.184249	4.6748
	tr|Q6ZS38|Q6ZS38-HUMAN	1.11503	0.0707546	0.610197	1.62902	0.332708	0.238556	4.67408
N4BP3	sp|O15049|N4BP3-HUMAN	1.35712	0.156086	0.553802	2.11935	0.183018	0.291114	4.66181
STAR	tr|Q6IBK0|Q6IBK0-HUMAN	1.18946	0.0924709	0.731446	1.69902	0.26663	0.255654	4.65262
MLST8	sp|Q9BVC4|LST8-HUMAN	1.00394	0.0469722	0.584595	1.44307	0.492748	0.21588	4.65045
SETX	sp|Q7Z333-4|SETX-HUMAN	0.724187	0.0127273	0.510649	0.94697	0.992754	0.155782	4.64872
COMMD2	sp|Q86X83|COMD2-HUMAN	1.06981	0.0606688	0.596014	1.57373	0.388426	0.230237	4.64655
C15orf39	sp|Q6ZRI6|CO039-HUMAN	1.02159	0.0505921	0.574703	1.46673	0.461766	0.220173	4.63994
TIMM10B	sp|Q9Y5J6|T10B-HUMAN	1.11604	0.0721766	0.608335	1.6483	0.332898	0.240723	4.63619
PSME4	sp|Q14997|PSME4-HUMAN	0.899241	0.0304455	0.541546	1.25513	0.718186	0.194037	4.63437
NFS1	sp|Q9Y697|NFS1-HUMAN	1.0178	0.0499721	0.561602	1.47218	0.468267	0.219635	4.63405
FAM96B	sp|Q9Y3D0|MIP18-HUMAN	1.0346	0.0534014	0.57448	1.4957	0.44049	0.223359	4.632
PIH1D1	sp|Q9NWS0-2|PIHD1-HUMAN	1.10148	0.0686568	0.574231	1.65852	0.34927	0.237884	4.63032
	tr|B4E3C6|B4E3C6-HUMAN	1.26813	0.120654	0.594276	1.95556	0.22008	0.273909	4.62974
IMP4	sp|Q96G21|IMP4-HUMAN	1.03595	0.0538231	0.564862	1.50541	0.438427	0.223947	4.62587
TYW1	sp|Q9NV66|TYW1-HUMAN	0.741996	0.0142687	0.505705	0.979282	0.98461	0.160987	4.60904
NUTF2	tr|A0A024R6Y2|A0A024R6Y2-HUMAN	1.03408	0.0541702	0.571864	1.47393	0.441792	0.225074	4.59439
PTTG1	sp|O95997|PTTG1-HUMAN	1.2579	0.118733	0.530953	1.94597	0.227093	0.27393	4.59205
STK40	sp|Q8N2I9-4|STK40-HUMAN	1.06488	0.0611691	0.57801	1.55368	0.396534	0.232255	4.58496
PSMD14	sp|O00487|PSDE-HUMAN	1.09689	0.0691411	0.584676	1.6181	0.356259	0.23972	4.5757
C1orf112	sp|Q9NSG2|CA112-HUMAN	1.0043	0.0486475	0.570529	1.45469	0.492223	0.219617	4.57295
PMM1	sp|Q92871|PMM1-HUMAN	1.1937	0.0973126	0.544101	1.82353	0.267322	0.26133	4.56779
DEGS1	sp|O15121|DEGS1-HUMAN	1.34522	0.157042	0.566865	2.13118	0.191839	0.294588	4.56645
FLOT2	sp|Q14254|FLOT2-HUMAN	0.607544	0.00654019	0.440906	0.766031	0.999999	0.133112	4.56415
CABIN1	tr|A0A024R1E5|A0A024R1E5-HUMAN	0.763638	0.0163242	0.512186	1.012	0.96784	0.167313	4.56414
NFYC	sp|Q13952|NFYC-HUMAN	0.839772	0.0239369	0.514953	1.14237	0.849813	0.184235	4.55815
FOXRED1	sp|Q96CU9|FXRD1-HUMAN	0.973987	0.0433296	0.564557	1.40025	0.549725	0.213717	4.55737
RBM14	sp|Q96PK6|RBM14-HUMAN	0.963704	0.0417472	0.565152	1.36594	0.570498	0.212017	4.54542
PHF19	tr|A0A087X169|A0A087X169-HUMAN	1.02621	0.0537354	0.566413	1.49594	0.454989	0.225888	4.54299
RPUSD1	sp|Q9UJJ7|RUSD1-HUMAN	1.19468	0.0987548	0.585653	1.83305	0.267793	0.263043	4.54176
	tr|Q9H715|Q9H715-HUMAN	0.957434	0.0408377	0.54115	1.36949	0.583414	0.211068	4.53615
DDX56	sp|Q9NY93|DDX56-HUMAN	0.571924	0.00521709	0.433881	0.712483	1	0.126292	4.52858
DNMT3B	sp|Q9UBC3|DNM3B-HUMAN	1.47486	0.230789	0.515804	2.39849	0.161464	0.325729	4.52787
HMGN2	sp|P05204|HMGN2-HUMAN	1.86341	0.589024	0.315259	3.34574	0.1302	0.411868	4.52429
ICAM4	sp|Q14773|ICAM4-HUMAN	1.00834	0.0506259	0.565749	1.45903	0.485216	0.223141	4.51885
ANGPT1	sp|Q15389|ANGP1-HUMAN	1.20468	0.103176	0.57734	1.85221	0.261992	0.266635	4.51808
MTO1	sp|Q9Y2Z2-6|MTO1-HUMAN	1.0278	0.0547528	0.57392	1.49098	0.452714	0.227664	4.51455
MUM1	tr|A0A0D9SGJ8|A0A0D9SGJ8-HUMAN	1.02202	0.0536616	0.589	1.51073	0.462135	0.226659	4.50907
ALKBH2	sp|Q6NS38|ALKB2-HUMAN	1.31867	0.150158	0.554483	2.1091	0.205433	0.293858	4.48743
HEATR1	tr|B2RWN5|B2RWN5-HUMAN	0.578835	0.00558081	0.436028	0.726533	1	0.129061	4.48498
MRPS12	tr|A0A024R0H2|A0A024R0H2-HUMAN	0.75973	0.0166771	0.501891	1.01285	0.968596	0.169981	4.46949
RRNAD1	sp|Q96FB5|RRNAD-HUMAN	1.20465	0.105705	0.570763	1.88548	0.264526	0.26989	4.46348
CIAO1	tr|B2RDJ6|B2RDJ6-HUMAN	1.11023	0.0764468	0.553778	1.68228	0.345066	0.249039	4.45806
HERC3	sp|Q15034|HERC3-HUMAN	1.12956	0.0819606	0.559124	1.73249	0.325436	0.253451	4.45673
E2F6	tr|Q6Q9Z7|Q6Q9Z7-HUMAN	1.07205	0.066502	0.574567	1.59663	0.389971	0.240548	4.45669
SLF1	sp|Q9BQI6|SLF1-HUMAN	0.932496	0.038085	0.531552	1.33218	0.635292	0.209281	4.45571
PSMA4	sp|P25789|PSA4-HUMAN	0.858587	0.0274444	0.536796	1.18861	0.803341	0.192949	4.44981
REV1	sp|Q9UBZ9|REV1-HUMAN	1.19412	0.103509	0.54473	1.79664	0.273132	0.269427	4.43207
ZNF440	sp|Q8IYI8|ZN440-HUMAN	1.12834	0.0825758	0.556171	1.69296	0.327576	0.254675	4.43051
GPATCH3	sp|Q96I76|GPTC3-HUMAN	1.29505	0.143321	0.574701	2.07784	0.217882	0.292327	4.43015
FAM207A	sp|Q9NSI2|F207A-HUMAN	1.05685	0.0638031	0.54325	1.54309	0.410964	0.239005	4.42187
STAG1	tr|Q4LE48|Q4LE48-HUMAN	0.918582	0.0365284	0.546839	1.29791	0.664944	0.208064	4.4149
RAB12	sp|Q6IQ22|RAB12-HUMAN	1.03677	0.0594598	0.566967	1.56594	0.440069	0.235196	4.40812
MRPL24	sp|Q96A35|RM24-HUMAN	1.09788	0.0748548	0.574506	1.66085	0.360264	0.249204	4.40555
PITPNB	sp|P48739-3|PIPNB-HUMAN	1.03773	0.0598317	0.559997	1.50952	0.438707	0.235712	4.40254
ARPC3	sp|O15145|ARPC3-HUMAN	1.12511	0.0826888	0.551859	1.69818	0.331752	0.255581	4.40217
OPLAH	tr|A7E261|A7E261-HUMAN	1.09145	0.0732339	0.559343	1.63714	0.367708	0.247943	4.40202
	tr|B4DZK0|B4DZK0-HUMAN	1.29088	0.143646	0.522637	2.04392	0.221398	0.293603	4.39668
ZGRF1	sp|Q86YA3|ZGRF1-HUMAN	1.11353	0.0798994	0.55944	1.66634	0.343974	0.253846	4.38664
PTP4A1	tr|B5BU78|B5BU78-HUMAN	1.22535	0.117595	0.585831	1.94637	0.255543	0.279856	4.37851
	tr|B4DL31|B4DL31-HUMAN	1.38319	0.193073	0.496312	2.23272	0.191584	0.317672	4.35415
SMUG1	tr|A0A024RAZ8|A0A024RAZ8-HUMAN	1.1166	0.0820188	0.517277	1.687	0.341953	0.256483	4.3535
POLD1	tr|M0R2B7|M0R2B7-HUMAN	0.93257	0.0399539	0.536643	1.32365	0.632071	0.214337	4.35094
HMGXB3	tr|Q562E5|Q562E5-HUMAN	0.986209	0.0500169	0.540495	1.43287	0.524585	0.226772	4.3489
MYC	tr|A0A087WUS5|A0A087WUS5-HUMAN	1.29087	0.146964	0.531756	2.04249	0.224004	0.296977	4.3467
RCOR3	sp|Q9P2K3-3|RCOR3-HUMAN	0.769117	0.0186179	0.500953	1.04297	0.954687	0.177408	4.3353
FKBPL	sp|Q9UIM3|FKBPL-HUMAN	0.991841	0.0514981	0.541584	1.43659	0.51434	0.228799	4.33499
DPP9	sp|Q86TI2-2|DPP9-HUMAN	1.04771	0.0641929	0.535406	1.55021	0.425318	0.241826	4.3325
PGM3	sp|O95394-4|AGM1-HUMAN	0.658584	0.0100347	0.462419	0.859164	0.999673	0.152104	4.32982
ODC1	sp|P11926|DCOR-HUMAN	1.09385	0.0764001	0.526021	1.65218	0.367103	0.252691	4.32881
	tr|A8K168|A8K168-HUMAN	1.34784	0.177306	0.523106	2.18735	0.204382	0.312409	4.31435
COPS3	sp|Q9UNS2|CSN3-HUMAN	0.998689	0.0535315	0.530051	1.44608	0.502261	0.231672	4.31078
NIP7	sp|Q9Y221|NIP7-HUMAN	1.1376	0.0905952	0.521685	1.72365	0.323779	0.264584	4.29959
TADA2L	tr|A0A024R0Y4|A0A024R0Y4-HUMAN	1.02126	0.0589454	0.526887	1.50095	0.465111	0.237733	4.29584
TMEM263	sp|Q8WUH6|TM263-HUMAN	0.599955	0.00705495	0.435963	0.765375	0.999999	0.14	4.28539
MVD	sp|P53602|MVD1-HUMAN	1.23332	0.126329	0.516376	1.9492	0.255768	0.288188	4.27957
VWDE	sp|Q8N2E2|VWDE-HUMAN	1.00899	0.0566151	0.537157	1.48417	0.48493	0.235819	4.27866
ZBTB5	sp|O15062|ZBTB5-HUMAN	1.01517	0.0580524	0.516017	1.48559	0.474899	0.23734	4.27728
MTCH1	tr|Q8IW90|Q8IW90-HUMAN	1.01205	0.0573805	0.530324	1.49273	0.47994	0.23669	4.27584
USP11	sp|P51784|UBP11-HUMAN	1.22897	0.124849	0.524045	1.92995	0.258487	0.287509	4.27455
HRAS	sp|P01112|RASH-HUMAN	0.93685	0.0425996	0.505638	1.36174	0.620184	0.220309	4.25243
DIMT1	sp|Q9UNQ2|DIM1-HUMAN	0.863657	0.0308028	0.519043	1.21482	0.781377	0.203214	4.24999
RNGTT	sp|O60942|MCE1-HUMAN	0.96425	0.0479699	0.532291	1.40651	0.56483	0.227141	4.24517
FBXO38	sp|Q6PIJ6|FBX38-HUMAN	1.04291	0.0657234	0.540388	1.55524	0.433536	0.245818	4.24262
MRS2	sp|Q9HD23|MRS2-HUMAN	1.02473	0.0613486	0.542198	1.52351	0.460234	0.241709	4.23952
SUCLG1	sp|P53597|SUCA-HUMAN	0.756837	0.0183027	0.484263	1.02497	0.963862	0.178754	4.23396
CETN3	tr|E5RJF8|E5RJF8-HUMAN	1.13867	0.0941701	0.516621	1.74297	0.325677	0.2695	4.22512
PSMA2	tr|A0A024RA52|A0A024RA52-HUMAN	0.949574	0.0455591	0.508166	1.37177	0.59338	0.224781	4.22445
BCORL1	sp|Q5H9F3-3|BCORL-HUMAN	0.997885	0.0555695	0.537496	1.46034	0.503579	0.236231	4.22418
	tr|Q59GQ0|Q59GQ0-HUMAN	1.00222	0.0565778	0.520313	1.4943	0.496277	0.237334	4.22283
NPRL3	sp|Q12980|NPRL3-HUMAN	1.20473	0.11813	0.566167	1.84681	0.2757	0.285293	4.22279
TNRC18	sp|O15417|TNC18-HUMAN	0.698817	0.0134178	0.467262	0.922902	0.99534	0.165759	4.21586
GTF2I	tr|X5DR09|X5DR09-HUMAN	0.598006	0.00719685	0.43026	0.764078	0.999999	0.141862	4.21541
DNAAF5	sp|Q86Y56|DAAF5-HUMAN	1.12164	0.0893265	0.521128	1.71633	0.342007	0.266463	4.20937
CT55	sp|Q8WUE5|CT55-HUMAN	0.955581	0.0472105	0.532647	1.38258	0.580992	0.22738	4.20258
	tr|A8K4P8|A8K4P8-HUMAN	0.741231	0.0171402	0.484774	1.00418	0.975953	0.176626	4.19662
hCG_39985	tr|Q08ET0|Q08ET0-HUMAN	0.902989	0.0378803	0.52097	1.2973	0.690914	0.215538	4.18946
DCTN5	sp|Q9BTE1|DCTN5-HUMAN	1.20572	0.120537	0.523434	1.89974	0.276745	0.287948	4.18729
FAM20B	sp|O75063|XYLK-HUMAN	0.939822	0.0445642	0.514766	1.37233	0.612203	0.224619	4.18406
RNF216	sp|Q9NWF9-1|RN216-HUMAN	1.16329	0.104713	0.538912	1.79642	0.306915	0.278171	4.18192
PKMYT1	sp|Q99640|PMYT1-HUMAN	1.09091	0.0817444	0.51271	1.6678	0.375255	0.262084	4.16245
EIF3K	sp|Q9UBQ5|EIF3K-HUMAN	1.24938	0.141236	0.510716	1.99959	0.253482	0.3008	4.15352
FAM21A	tr|B7ZME8|B7ZME8-HUMAN	2.14523	1.23684	-0.0644885	4.30859	0.14922	0.518421	4.138
PSMC6	tr|A0A087X2I1|A0A087X2I1-HUMAN	0.841724	0.0295121	0.506144	1.18224	0.821561	0.204094	4.1242
NT5C	sp|Q8TCD5|NT5C-HUMAN	1.02076	0.0639062	0.53439	1.51504	0.467275	0.247655	4.12169
MRPL41	sp|Q8IXM3|RM41-HUMAN	1.50914	0.306223	0.377389	2.61536	0.178767	0.366682	4.11567
TTC38	sp|Q5R3I4|TTC38-HUMAN	1.27734	0.157897	0.509872	2.06801	0.242604	0.311086	4.10607
NXF2	sp|Q9GZY0|NXF2-HUMAN	1.44008	0.255098	0.423408	2.44463	0.191789	0.350725	4.10601
TRIM65	sp|Q6PJ69|TRI65-HUMAN	0.706553	0.0147889	0.470086	0.947192	0.99209	0.172117	4.10508
CHRNA5	sp|P30532|ACHA5-HUMAN	1.12234	0.0943927	0.530918	1.71749	0.345242	0.273744	4.09996
COPS7A	sp|Q9UBW8|CSN7A-HUMAN	0.735666	0.0174315	0.4754	0.996496	0.977363	0.179468	4.09915
PALB2	sp|Q86YC2|PALB2-HUMAN	0.763191	0.020204	0.479359	1.04644	0.952145	0.186245	4.09777
PET100	sp|P0DJ07|PT100-HUMAN	1.17773	0.114821	0.544767	1.84701	0.299963	0.287717	4.09337
UQCRC2	sp|P22695|QCR2-HUMAN	0.839535	0.0296552	0.508667	1.18045	0.824284	0.205122	4.09286
SPACIA1	tr|G1UCX3|G1UCX3-HUMAN	0.905201	0.0401687	0.512784	1.29888	0.681893	0.221411	4.08833
INSIG1	tr|A4D2M9|A4D2M9-HUMAN	1.02442	0.0667857	0.556884	1.49718	0.462358	0.252269	4.06083
RCOR2	tr|F1T0J8|F1T0J8-HUMAN	0.745545	0.0187647	0.482047	1.01036	0.968383	0.183737	4.05767
PMF1-BGLAP	tr|U3KQ54|U3KQ54-HUMAN	0.851231	0.0321012	0.503702	1.21469	0.796824	0.210481	4.04421
HBG2	tr|D3GKD9|D3GKD9-HUMAN	1.32237	0.18719	0.458844	2.17107	0.228106	0.327181	4.04171
MCM3	sp|P25205-2|MCM3-HUMAN	0.688756	0.0138185	0.453276	0.925595	0.995948	0.170673	4.03553
NR1D1	sp|P20393|NR1D1-HUMAN	1.0443	0.0733455	0.501013	1.60028	0.435033	0.259335	4.02683
RNF219	sp|Q5W0B1|RN219-HUMAN	0.725825	0.0171241	0.469235	0.989977	0.981923	0.18029	4.02587
DAP3	sp|P51398|RT29-HUMAN	0.669252	0.0124213	0.443983	0.891023	0.9985	0.166531	4.01879
PHF8	sp|Q9UPP1|PHF8-HUMAN	1.02205	0.0679347	0.501549	1.53306	0.46629	0.25502	4.00773
WDR76	sp|Q9H967|WDR76-HUMAN	1.17331	0.118006	0.491334	1.85427	0.306951	0.292779	4.0075
COPS8	tr|A0A024R4D1|A0A024R4D1-HUMAN	0.819338	0.0281077	0.476065	1.14168	0.859392	0.204621	4.00418
MAPK14	tr|L7RSM2|L7RSM2-HUMAN	1.13578	0.103877	0.522688	1.78938	0.336773	0.283769	4.00248
MRPL21	sp|Q7Z2W9|RM21-HUMAN	1.04236	0.0737831	0.467046	1.59458	0.438037	0.260592	3.99997
CA8	sp|P35219|CAH8-HUMAN	1.03022	0.0704245	0.498532	1.54741	0.454668	0.257592	3.99943
ATP23	sp|Q9Y6H3|ATP23-HUMAN	1.12066	0.0986144	0.488474	1.72891	0.350403	0.280218	3.99924
NISCH	sp|Q9Y2I1|NISCH-HUMAN	0.79693	0.0252318	0.487366	1.11561	0.899448	0.199321	3.99822
AAAS	sp|Q9NRG9|AAAS-HUMAN	0.855057	0.0335005	0.497729	1.22153	0.785791	0.214058	3.99452
	tr|B2RA05|B2RA05-HUMAN	1.02265	0.0688436	0.514074	1.53518	0.465604	0.256569	3.98586
IPO8	sp|O15397|IPO8-HUMAN	0.575264	0.00689514	0.414567	0.737762	1	0.144346	3.98532
ABHD11	sp|Q8NFV4|ABHDB-HUMAN	0.998803	0.0627044	0.484876	1.50918	0.501907	0.250709	3.98392
NBEAL2	sp|Q6ZNJ1|NBEL2-HUMAN	1.03048	0.0713173	0.481385	1.5353	0.454566	0.259154	3.97632
SIRT1	tr|A0A024QZQ1|A0A024QZQ1-HUMAN	1.2349	0.147283	0.481686	1.984	0.270243	0.310774	3.97363
OGFOD1	sp|Q8N543|OGFD1-HUMAN	1.15576	0.113529	0.496801	1.80735	0.321941	0.291532	3.96444
ASPM	sp|Q8IZT6|ASPM-HUMAN	0.825417	0.0295578	0.491389	1.1568	0.845058	0.208287	3.96288
HEL-S-271	tr|V9HW31|V9HW31-HUMAN	0.70325	0.015576	0.461008	0.948181	0.99129	0.177467	3.9627
EMC3	sp|Q9P0I2|EMC3-HUMAN	1.04328	0.0756356	0.505744	1.61214	0.437476	0.26361	3.95766
SAMM50	sp|Q9Y512|SAM50-HUMAN	0.924053	0.0466893	0.491555	1.36208	0.637386	0.233836	3.95171
SPTLC1	tr|A0A024R277|A0A024R277-HUMAN	1.00413	0.0651677	0.473077	1.51167	0.493546	0.25423	3.9497
ZNF215	sp|Q9UL58|ZN215-HUMAN	1.44986	0.283703	0.845432	2.06072	0.199168	0.367372	3.94657
RPL35A	sp|P18077|RL35A-HUMAN	0.618281	0.00938962	0.42109	0.813764	0.999959	0.156725	3.94501
ELF2	sp|Q15723|ELF2-HUMAN	0.702867	0.0156842	0.453805	0.953835	0.991168	0.17818	3.94471
PPIP5K1	sp|Q6PFW1|VIP1-HUMAN	1.0733	0.085418	0.476092	1.65162	0.400984	0.272304	3.94155
PPP2CA	sp|P67775|PP2AA-HUMAN	0.85657	0.0347094	0.49655	1.23324	0.779311	0.217501	3.93824
SDCCAG3	sp|Q96C92|SDCG3-HUMAN	2.41267	2.18856	-0.232965	5.22807	0.15928	0.613171	3.93475
DNAJC5	sp|Q9H3Z4|DNJC5-HUMAN	1.04695	0.0776877	0.485212	1.61554	0.433116	0.266226	3.93256
TRIM11	sp|Q96F44|TRI11-HUMAN	0.932536	0.048984	0.472781	1.39413	0.619749	0.237335	3.9292
MRPS22	sp|P82650|RT22-HUMAN	0.800282	0.0267326	0.478668	1.12509	0.889053	0.204304	3.91711
NPAT	tr|B9EG70|B9EG70-HUMAN	0.590079	0.00790156	0.411884	0.767821	0.999998	0.150642	3.91709
C6orf89	sp|Q6UWU4-2|CF089-HUMAN	1.27955	0.174834	0.478478	2.11113	0.251885	0.32678	3.91563
RBMX	sp|P38159|RBMX-HUMAN	0.859801	0.0357839	0.490683	1.23819	0.770696	0.220012	3.90798
	tr|A8KA77|A8KA77-HUMAN	0.783586	0.0249584	0.466268	1.10548	0.914635	0.201614	3.88656
COMMD3-BMI1	tr|R4GMX3|R4GMX3-HUMAN	0.795023	0.0265206	0.464854	1.11671	0.895926	0.204839	3.88122
SNAP47	sp|Q5SQN1|SNP47-HUMAN	1.07591	0.0894668	0.469468	1.67235	0.39983	0.278007	3.87009
	tr|B4E0Z6|B4E0Z6-HUMAN	0.975589	0.0605635	0.491903	1.48175	0.539507	0.252254	3.86748
RLF	sp|Q13129|RLF-HUMAN	0.791639	0.0263185	0.474532	1.1178	0.900492	0.204929	3.86299
CASP2	tr|A0A0S2Z3H1|A0A0S2Z3H1-HUMAN	1.25937	0.168823	0.459776	2.08927	0.263937	0.326259	3.86003
TCEAL8	sp|Q8IYN2|TCAL8-HUMAN	0.694402	0.015679	0.452142	0.940007	0.992668	0.180322	3.8509
DHX34	sp|Q14147|DHX34-HUMAN	1.03457	0.0774029	0.478045	1.58579	0.450556	0.268917	3.84717
GINS2	sp|Q9Y248|PSF2-HUMAN	0.965883	0.0590784	0.476363	1.4718	0.555814	0.251646	3.83826
GNB2	sp|P62879|GBB2-HUMAN	0.840777	0.0339538	0.485752	1.20631	0.806232	0.219161	3.83634
STAG2	sp|Q8N3U4-2|STAG2-HUMAN	1.00096	0.068787	0.477795	1.52022	0.49854	0.262021	3.82015
HNRPLL	tr|A0A0S2Z5U3|A0A0S2Z5U3-HUMAN	0.648311	0.0121471	0.430705	0.866879	0.999291	0.170002	3.81356
SMCHD1	sp|A6NHR9|SMHD1-HUMAN	0.895066	0.04424	0.482568	1.3061	0.691073	0.234992	3.80893
TFDP2	sp|Q14188|TFDP2-HUMAN	1.03431	0.0789296	0.502195	1.61351	0.4514	0.271625	3.80786
DCAF13	tr|A0A087WT20|A0A087WT20-HUMAN	0.936378	0.0533417	0.472627	1.3961	0.608522	0.246651	3.79637
TFB2M	sp|Q9H5Q4|TFB2M-HUMAN	0.623366	0.0105438	0.422223	0.827825	0.999878	0.164723	3.78432
PSMC3	sp|P17980|PRS6A-HUMAN	0.560514	0.00691817	0.396687	0.723133	1	0.148392	3.77726
HDHD2	sp|Q9H0R4|HDHD2-HUMAN	0.980536	0.0648611	0.550686	1.42487	0.53046	0.259734	3.77516
LRRC58	sp|Q96CX6|LRC58-HUMAN	1.07375	0.0933483	0.497433	1.63647	0.404629	0.284544	3.77358
KLHL21	sp|Q9UJP4|KLH21-HUMAN	1.0993	0.102728	0.472634	1.74065	0.37835	0.29156	3.77041
NDUFA4	sp|O00483|NDUA4-HUMAN	0.912955	0.0488733	0.483379	1.34276	0.653113	0.242151	3.77019
MRPL14	tr|A0A024RD78|A0A024RD78-HUMAN	0.997927	0.0698698	0.458345	1.52332	0.503129	0.264878	3.7675
ATAD2	sp|Q6PL18|ATAD2-HUMAN	1.07816	0.095387	0.477348	1.70132	0.400107	0.286458	3.76376
PIWIL4	tr|A0A140VKG8|A0A140VKG8-HUMAN	1.24884	0.171776	0.410569	2.08245	0.274121	0.331875	3.76298
GRB10	sp|Q13322|GRB10-HUMAN	0.803214	0.0294163	0.45973	1.14912	0.874384	0.213532	3.76156
TAF15	sp|Q92804|RBP56-HUMAN	1.06326	0.0903975	0.469677	1.6518	0.416677	0.282774	3.76011
IREB2	tr|A0A0A6YY96|A0A0A6YY96-HUMAN	1.05953	0.0893036	0.469637	1.64138	0.421051	0.282047	3.75657
FIBP	sp|O43427|FIBP-HUMAN	1.05531	0.0882892	0.446315	1.64846	0.426166	0.281562	3.74806
DTX3L	sp|Q8TDB6|DTX3L-HUMAN	0.824418	0.0329186	0.455174	1.18608	0.833413	0.220076	3.74606
LCMT2	sp|O60294|TYW4-HUMAN	0.971338	0.0634738	0.454761	1.48089	0.545288	0.259374	3.74493
PAPD7	tr|A0A0X1KG68|A0A0X1KG68-HUMAN	0.842119	0.0360145	0.471485	1.22247	0.797278	0.225354	3.73687
PNKD	sp|Q8N490|PNKD-HUMAN	0.902174	0.0474463	0.452846	1.33822	0.673324	0.241441	3.73662
CBWD2	sp|Q8IUF1|CBWD2-HUMAN	0.955139	0.0597397	0.447362	1.45032	0.572814	0.255897	3.73252
MYH4	sp|Q9Y623|MYH4-HUMAN	1.26445	0.183667	0.423358	2.14237	0.268597	0.338933	3.73068
RRP12	sp|Q5JTH9|RRP12-HUMAN	0.645244	0.0124594	0.426404	0.861895	0.999259	0.172991	3.72992
RPS6KA4	sp|O75676|KS6A4-HUMAN	1.18423	0.141631	0.469454	1.9613	0.312233	0.317792	3.72643
EDEM3	sp|Q9BZQ6|EDEM3-HUMAN	1.05343	0.0887244	0.453892	1.68138	0.428821	0.282759	3.72555
	tr|B2R702|B2R702-HUMAN	1.02789	0.0804816	0.459322	1.60591	0.460843	0.275995	3.7243
UBXN6	sp|Q9BZV1|UBXN6-HUMAN	1.09154	0.102783	0.468802	1.71188	0.387619	0.293712	3.71637
LZTR1	sp|Q8N653|LZTR1-HUMAN	0.917499	0.0514473	0.467552	1.36589	0.64197	0.247215	3.71133
SPC25	sp|Q9HBM1|SPC25-HUMAN	0.878375	0.0434213	0.465051	1.30287	0.720281	0.237231	3.70261
NQO2	sp|P16083|NQO2-HUMAN	1.05697	0.0910453	0.463319	1.65191	0.425122	0.285474	3.70251
GNAS	sp|Q5JWF2|GNAS1-HUMAN	1.04689	0.0878989	0.471604	1.63874	0.437167	0.283198	3.69667
ZNF281	sp|Q9Y2X9|ZN281-HUMAN	0.525218	0.00558499	0.37615	0.670616	1	0.142289	3.6912
CDC25B	sp|P30305|MPIP2-HUMAN	1.03269	0.0835469	0.452333	1.5993	0.454977	0.279895	3.68956
SNIP1	tr|B1AK66|B1AK66-HUMAN	0.707412	0.0183973	0.429864	0.981682	0.984503	0.191736	3.6895
RALY	tr|Q53GL6|Q53GL6-HUMAN	0.679695	0.0158203	0.429367	0.929109	0.994561	0.185052	3.673
TBKBP1	sp|A7MCY6|TBKB1-HUMAN	0.882739	0.0450211	0.463918	1.30244	0.709746	0.240367	3.67246
SMCR8	sp|Q8TEV9|SMCR8-HUMAN	0.920676	0.0532939	0.463139	1.38556	0.63443	0.250745	3.67177
NSUN2	sp|Q08J23|NSUN2-HUMAN	0.674836	0.01548	0.421116	0.916151	0.995519	0.184369	3.66025
LONRF3	sp|Q496Y0|LONF3-HUMAN	1.05545	0.0929021	0.399946	1.65288	0.427821	0.288785	3.65479
TICRR	sp|Q7Z2Z1|TICRR-HUMAN	0.976192	0.0687825	0.459194	1.49392	0.536166	0.26866	3.63355
KIAA0430	sp|Q9Y4F3|MARF1-HUMAN	0.517568	0.00543514	0.373543	0.665661	1	0.142442	3.63354
ANKRD27	sp|Q96NW4|ANR27-HUMAN	1.02001	0.0820701	0.449216	1.58064	0.472157	0.280859	3.63175
TBCK	sp|Q8TEA7|TBCK-HUMAN	0.660912	0.0144894	0.420549	0.905777	0.997576	0.18213	3.62879
FAM51A1	tr|A0A024RBX2|A0A024RBX2-HUMAN	0.757456	0.0250677	0.440155	1.07001	0.937228	0.209026	3.62374
	tr|B2R577|B2R577-HUMAN	0.889616	0.0481502	0.44764	1.33707	0.692534	0.246659	3.60667
MAEA	tr|E7ESC7|E7ESC7-HUMAN	0.921324	0.055414	0.464166	1.3759	0.630893	0.255504	3.60591
FUS	sp|P35637|FUS-HUMAN	0.849563	0.0401417	0.45698	1.23057	0.77363	0.235832	3.60241
MALSU1	sp|Q96EH3|MASU1-HUMAN	0.903962	0.0514595	0.444633	1.36558	0.663984	0.250947	3.6022
POLR2H	sp|P52434|RPAB3-HUMAN	0.92083	0.055439	0.42762	1.41373	0.631656	0.255699	3.60123
SSFA2	sp|P28290|SSFA2-HUMAN	0.699494	0.0184695	0.432124	0.967988	0.986489	0.194287	3.60031
TAF13	sp|Q15543|TAF13-HUMAN	1.21285	0.167454	0.416798	2.04231	0.301481	0.337397	3.59473
ALMS1	tr|A0A087WZY3|A0A087WZY3-HUMAN	0.453194	0.00327532	0.342085	0.563759	1	0.126282	3.58874
IER2	sp|Q9BTL4|IER2-HUMAN	0.917458	0.0552206	0.425672	1.38118	0.637302	0.256132	3.58197
CANX	sp|P27824-2|CALX-HUMAN	1.08263	0.107111	0.432032	1.73293	0.400336	0.302299	3.58132
MYDGF	tr|M0QYN0|M0QYN0-HUMAN	1.28819	0.214976	0.398285	2.22221	0.267115	0.359928	3.57903
CHAC2	sp|Q8WUX2|CHAC2-HUMAN	0.95082	0.063913	0.427877	1.45102	0.577121	0.265887	3.57604
	tr|Q86U62|Q86U62-HUMAN	1.07293	0.10409	0.420272	1.7252	0.410582	0.3007	3.56811
SAE1	sp|Q9UBE0|SAE1-HUMAN	0.966217	0.0686909	0.469838	1.48394	0.551281	0.271253	3.56205
ARHGAP19	sp|Q14CB8-2|RHG19-HUMAN	0.988209	0.0752081	0.472282	1.48971	0.517147	0.277513	3.56095
LRRC41	sp|Q15345|LRC41-HUMAN	1.18592	0.156133	0.365686	1.9499	0.318991	0.33319	3.55929
P4HA2	sp|O15460|P4HA2-HUMAN	1.01481	0.0837267	0.436382	1.57571	0.47959	0.285133	3.55908
WRAP73	sp|Q9P2S5|WRP73-HUMAN	0.691211	0.0180224	0.426248	0.953085	0.98928	0.194221	3.55889
TRIM39-RPP21	tr|A0A096LP39|A0A096LP39-HUMAN	1.03841	0.0918944	0.45853	1.59406	0.449586	0.291928	3.55708
DCC1	tr|A0A024R9J7|A0A024R9J7-HUMAN	1.22699	0.179148	0.409937	2.06611	0.295879	0.344957	3.55694
PYCR1	sp|P32322-3|P5CR1-HUMAN	0.949798	0.0644626	0.443839	1.46995	0.578371	0.267315	3.55311
LMNB2	sp|Q03252|LMNB2-HUMAN	0.770298	0.0278881	0.437929	1.10371	0.915509	0.216796	3.55311
GET4	sp|Q7L5D6|GET4-HUMAN	0.869477	0.0454672	0.439212	1.29619	0.729771	0.24524	3.54542
RBM4	sp|Q9BWF3|RBM4-HUMAN	0.920897	0.0572336	0.433311	1.38755	0.629545	0.259785	3.54484
	tr|B4DTN5|B4DTN5-HUMAN	1.3396	0.256631	0.41396	2.19084	0.25131	0.378163	3.54238
	tr|B4DP48|B4DP48-HUMAN	1.27942	0.214559	0.371975	2.25307	0.273177	0.362043	3.53389
TUBGCP2	sp|Q9BSJ2-4|GCP2-HUMAN	0.531961	0.00642607	0.378736	0.689738	1	0.150693	3.5301
LRPPRC	sp|P42704|LPPRC-HUMAN	0.485923	0.00450661	0.356333	0.616056	1	0.138152	3.5173
SAGE1	sp|Q9NXZ1|SAGE1-HUMAN	0.713104	0.020904	0.426216	0.997802	0.976389	0.20275	3.51715
	tr|A0A142I7X2|A0A142I7X2-HUMAN	1.08533	0.112202	0.433117	1.77314	0.399461	0.30863	3.5166
ZNF844	sp|Q08AG5|ZN844-HUMAN	1.2933	0.226692	0.32091	2.21732	0.26894	0.368145	3.51302
HCCS	sp|P53701|CCHL-HUMAN	0.733193	0.0234269	0.430445	1.02934	0.959348	0.208756	3.5122
SBDS	sp|Q9Y3A5|SBDS-HUMAN	1.15117	0.14325	0.399188	1.88638	0.344796	0.328782	3.50132
SSX1	sp|Q16384|SSX1-HUMAN	1.37807	0.294966	0.265045	2.44384	0.24317	0.394108	3.49669
THAP4	sp|Q8WY91|THAP4-HUMAN	0.834047	0.0396805	0.436581	1.2336	0.797606	0.238835	3.49215
HSPB11	sp|Q9Y547|IFT25-HUMAN	0.990617	0.0792231	0.434055	1.57137	0.513297	0.284132	3.48647
PLEKHG4	tr|A0A024R6X4|A0A024R6X4-HUMAN	1.11866	0.128855	0.435986	1.80385	0.370487	0.320887	3.48615
HEPH	sp|Q9BQS7-3|HEPH-HUMAN	1.00004	0.0825002	0.455013	1.53316	0.499944	0.287217	3.48183
NARF	sp|Q9UHQ1|NARF-HUMAN	0.760133	0.0275876	0.426877	1.08605	0.925652	0.218508	3.47874
RPL38	sp|P63173|RL38-HUMAN	0.541768	0.0071529	0.369695	0.707734	1	0.156109	3.47045
ADPGK	sp|Q9BRR6|ADPGK-HUMAN	0.916278	0.0585384	0.442788	1.42426	0.635342	0.264054	3.47004
ALG2	tr|A0A024R184|A0A024R184-HUMAN	1.04697	0.0998551	0.396456	1.6357	0.440919	0.301822	3.46883
NXF1	sp|Q9UBU9|NXF1-HUMAN	0.662527	0.0160625	0.414283	0.907208	0.996125	0.191295	3.46338
RPL23	sp|P62829|RL23-HUMAN	0.50905	0.00561404	0.360739	0.658319	1	0.14719	3.45846
DPH2	sp|Q9BQC3|DPH2-HUMAN	1.24317	0.199849	0.328036	2.14737	0.293238	0.359601	3.45708
HSDL1	sp|Q3SXM5|HSDL1-HUMAN	0.920263	0.0600828	0.440961	1.3956	0.627523	0.266356	3.45501
	tr|Q14475|Q14475-HUMAN	0.645352	0.0145398	0.397955	0.883348	0.998365	0.186845	3.45393
BCL2L1	tr|A0A0S2Z3C5|A0A0S2Z3C5-HUMAN	1.19602	0.171765	0.359568	2.02609	0.318117	0.34652	3.45151
CYC1	sp|P08574|CY1-HUMAN	0.859316	0.0457865	0.445297	1.29565	0.744561	0.249009	3.45094
	tr|B2RDP1|B2RDP1-HUMAN	0.91099	0.0584223	0.464446	1.3445	0.643659	0.265323	3.43351
ZWINT	tr|A0A024QZN5|A0A024QZN5-HUMAN	0.752522	0.0273034	0.427235	1.08251	0.932896	0.219578	3.42713
RPUSD4	sp|Q96CM3|RUSD4-HUMAN	1.00574	0.0875762	0.42684	1.62377	0.492262	0.294244	3.41805
WDR53	sp|Q7Z5U6|WDR53-HUMAN	0.935926	0.0657098	0.394769	1.4232	0.59869	0.273888	3.41718
BAG6	sp|P46379-3|BAG6-HUMAN	0.926393	0.0631448	0.426145	1.41993	0.615209	0.271252	3.41524
TET1	sp|Q8NFU7|TET1-HUMAN	0.974484	0.0773489	0.430155	1.52905	0.53655	0.285399	3.41446
	tr|B2RC06|B2RC06-HUMAN	1.12706	0.138799	0.367159	1.88454	0.366534	0.330557	3.40958
ILK	tr|A0A0A0MTH3|A0A0A0MTH3-HUMAN	0.84283	0.043667	0.429343	1.2441	0.774014	0.247934	3.39941
	tr|B4E071|B4E071-HUMAN	0.913241	0.0601974	0.406436	1.41358	0.638185	0.26866	3.39924
USP1	sp|O94782|UBP1-HUMAN	0.797877	0.035197	0.432174	1.1671	0.859341	0.235135	3.39328
PCGF6	sp|Q9BYE7|PCGF6-HUMAN	1.14428	0.148935	0.379534	1.92431	0.354255	0.337261	3.39286
KDM5C	sp|P41229|KDM5C-HUMAN	0.969373	0.0768732	0.43268	1.51244	0.543979	0.28602	3.38918
C17orf62	tr|A0A024R8W9|A0A024R8W9-HUMAN	0.806912	0.0369713	0.418737	1.19815	0.84236	0.23829	3.38626
ZNF644	sp|Q9H582|ZN644-HUMAN	1.08736	0.122409	0.40079	1.78573	0.401412	0.321761	3.3794
KIAA1328	sp|Q86T90|K1328-HUMAN	0.979278	0.0805391	0.412808	1.54453	0.529104	0.289799	3.37916
CRY1	tr|A2I2P0|A2I2P0-HUMAN	0.92144	0.0631716	0.4183	1.42579	0.622694	0.272768	3.37811
SETMAR	sp|Q53H47|SETMR-HUMAN	0.571297	0.00935387	0.383607	0.768932	0.999995	0.169291	3.37465
DKFZp686J1525	tr|Q6AWA7|Q6AWA7-HUMAN	1.32286	0.268954	0.297369	2.33843	0.266786	0.392035	3.37434
CDK4	tr|A0A024RBB6|A0A024RBB6-HUMAN	1.2764	0.233204	0.314818	2.22694	0.283537	0.378339	3.37369
IPO4	sp|Q8TEX9-2|IPO4-HUMAN	0.945634	0.0703687	0.427145	1.49162	0.581193	0.280522	3.37098
TSTD2	sp|Q5T7W7|TSTD2-HUMAN	0.817998	0.0395228	0.43147	1.2226	0.820032	0.243037	3.36574
C2orf33	tr|A0A024R491|A0A024R491-HUMAN	1.18307	0.174972	0.378727	1.97224	0.330818	0.353569	3.34608
ESD	sp|P10768|ESTD-HUMAN	0.855889	0.0479825	0.416023	1.302	0.744697	0.255932	3.34421
	tr|B2R6H3|B2R6H3-HUMAN	0.802449	0.0371933	0.417664	1.17656	0.847164	0.240334	3.33889
	tr|B4DU42|B4DU42-HUMAN	1.00919	0.0936572	0.425101	1.59925	0.488022	0.303248	3.32794
CEP295	tr|H0YDK0|H0YDK0-HUMAN	1.12639	0.145524	0.313569	1.91338	0.370202	0.338671	3.32591
UHRF1	tr|A0A087WTW0|A0A087WTW0-HUMAN	0.71878	0.0242326	0.415187	1.02625	0.964583	0.216573	3.31888
TBCD	sp|Q9BTW9-4|TBCD-HUMAN	0.67075	0.0184815	0.394738	0.946185	0.99228	0.202679	3.30943
AAMP	tr|C9JEH3|C9JEH3-HUMAN	0.961217	0.0780106	0.368633	1.52151	0.555218	0.290573	3.308
FAN1	sp|Q9Y2M0|FAN1-HUMAN	0.901833	0.0604788	0.422025	1.38755	0.655118	0.272694	3.30713
PDE12	sp|Q6L8Q7|PDE12-HUMAN	0.983155	0.0855782	0.365118	1.57469	0.522959	0.29755	3.30417
	tr|Q59EG8|Q59EG8-HUMAN	0.677734	0.0193433	0.404875	0.945659	0.989752	0.205214	3.30258
ARL14EP	sp|Q8N8R7|AL14E-HUMAN	0.902054	0.0612937	0.396942	1.38874	0.653807	0.274458	3.28668
FAM96A	sp|Q9H5X1|FA96A-HUMAN	0.889849	0.0581734	0.420642	1.39722	0.676055	0.271048	3.283
PSMD6	sp|Q15008-4|PSMD6-HUMAN	0.7249	0.0256458	0.410544	1.04205	0.957087	0.220917	3.28132
KRBA1	tr|A0A0C4DH65|A0A0C4DH65-HUMAN	1.36936	0.326816	0.24653	2.50908	0.259091	0.417478	3.28007
TCEB1	tr|A0A024R7Y5|A0A024R7Y5-HUMAN	0.934493	0.0708848	0.408002	1.4628	0.597176	0.284905	3.28001
PPP1R15B	sp|Q5SWA1|PR15B-HUMAN	0.929956	0.0696119	0.481987	1.40943	0.60468	0.283713	3.2778
LRRCC1	sp|Q9C099|LRCC1-HUMAN	0.712748	0.0240842	0.396626	1.0168	0.967912	0.217736	3.27345
MRPS7	tr|J3QLS3|J3QLS3-HUMAN	0.677148	0.0196851	0.395578	0.948933	0.989307	0.207198	3.26812
MIS18BP1	sp|Q6P0N0|M18BP-HUMAN	0.751995	0.0299701	0.412654	1.10644	0.92401	0.230213	3.26652
FANCL	sp|Q9NW38-2|FANCL-HUMAN	1.11535	0.145755	0.333503	1.88133	0.381273	0.342295	3.25845
RNPEP	sp|Q9H4A4|AMPB-HUMAN	0.757588	0.0310523	0.39543	1.11459	0.915535	0.232602	3.25701
UBN2	sp|Q6ZU65|UBN2-HUMAN	0.883515	0.0574517	0.417127	1.35511	0.686509	0.271292	3.25669
AVEN	sp|Q9NQS1|AVEN-HUMAN	0.778265	0.0347502	0.401507	1.1486	0.882874	0.239525	3.2492
ATG5	tr|A9UGY9|A9UGY9-HUMAN	1.03111	0.107449	0.408596	1.64336	0.462194	0.317904	3.24346
NAE1	sp|Q13564|ULA1-HUMAN	1.19931	0.197657	0.333787	2.09024	0.326966	0.370702	3.23524
PSMD1	sp|Q99460|PSMD1-HUMAN	0.518048	0.0068828	0.355494	0.675731	1	0.160145	3.23487
KDM5A	sp|P29375|KDM5A-HUMAN	0.754826	0.0310418	0.412322	1.10373	0.917972	0.233414	3.23385
IQGAP3	tr|A2RRC9|A2RRC9-HUMAN	1.09737	0.138786	0.383777	1.79552	0.396904	0.339484	3.23246
CDK6	sp|Q00534|CDK6-HUMAN	0.881514	0.0580144	0.407992	1.36192	0.688614	0.273236	3.22619
SMPD4	sp|Q9NXE4-4|NSMA3-HUMAN	0.638483	0.015978	0.380562	0.885372	0.997882	0.197976	3.22506
LDB3	sp|O75112-7|LDB3-HUMAN	1.90928	1.28266	-0.38441	4.15272	0.205924	0.59318	3.21872
ZBTB2	sp|Q8N680|ZBTB2-HUMAN	0.929034	0.0720123	0.393904	1.47759	0.604284	0.28885	3.21632
MYNN	sp|Q9NPC7|MYNN-HUMAN	0.919148	0.0691349	0.41146	1.45094	0.620768	0.286064	3.21309
FAM65C	sp|Q96MK2|FA65C-HUMAN	0.885369	0.0600003	0.395282	1.39104	0.6801	0.276664	3.20016
SRM	sp|P19623|SPEE-HUMAN	0.861757	0.053927	0.386578	1.31596	0.72418	0.269475	3.19791
DKFZp686A111	tr|Q6AHZ7|Q6AHZ7-HUMAN	0.787145	0.037579	0.398064	1.16329	0.863903	0.246274	3.19622
RRP1	tr|Q6PJJ2|Q6PJJ2-HUMAN	0.636415	0.0160596	0.378936	0.890415	0.997941	0.199126	3.19605
CRYAB	sp|P02511|CRYAB-HUMAN	0.896948	0.0634125	0.401984	1.38957	0.658815	0.28075	3.19483
SIN3B	sp|O75182|SIN3B-HUMAN	0.782415	0.0367346	0.401121	1.1559	0.871865	0.244963	3.19401
CUL2	sp|Q13617-2|CUL2-HUMAN	0.902234	0.0650749	0.388393	1.43047	0.649232	0.28274	3.19104
	tr|B3KU76|B3KU76-HUMAN	0.897758	0.0638913	0.400468	1.38779	0.657074	0.281554	3.18858
NOL6	sp|Q9H6R4|NOL6-HUMAN	0.62135	0.0146991	0.38596	0.859229	0.999105	0.195123	3.1844
KTI12	sp|Q96EK9|KTI12-HUMAN	0.933862	0.0750964	0.393962	1.47441	0.595357	0.293445	3.18241
TGFBR3	sp|Q03167|TGBR3-HUMAN	0.869559	0.0564598	0.420736	1.35283	0.708485	0.273257	3.18221
KDM5B	sp|Q9UGL1-2|KDM5B-HUMAN	1.39349	0.373002	0.165638	2.58299	0.259651	0.43828	3.17945
FAM124B	sp|Q9H5Z6|F124B-HUMAN	0.91309	0.0687691	0.41945	1.45194	0.629835	0.287199	3.17929
	tr|A0A140VJG2|A0A140VJG2-HUMAN	0.865009	0.0554275	0.374887	1.34012	0.716806	0.272171	3.17818
CSE1L	sp|P55060|XPO2-HUMAN	0.657296	0.0185945	0.39139	0.928064	0.994018	0.207459	3.16833
C18orf8	sp|Q96DM3|MIC1-HUMAN	0.665171	0.0195071	0.392448	0.950494	0.991742	0.209973	3.16789
GUK1	tr|A0A024R3U5|A0A024R3U5-HUMAN	0.913908	0.0695246	0.394171	1.42356	0.62798	0.288514	3.16764
UVSSA	sp|Q2YD98|UVSSA-HUMAN	1.01396	0.105422	0.386218	1.67369	0.482853	0.320217	3.16647
TRPT1	sp|Q86TN4|TRPT1-HUMAN	0.891103	0.062925	0.411997	1.38221	0.667897	0.281503	3.16551
ASUN	sp|Q9NVM9|ASUN-HUMAN	0.652098	0.0180769	0.388201	0.912772	0.995167	0.206181	3.16274
FAM46C	sp|Q5VWP2|FA46C-HUMAN	1.06412	0.128258	0.354299	1.75907	0.428953	0.336552	3.16183
POLR2H	sp|P52434-4|RPAB3-HUMAN	0.940666	0.0783549	0.410207	1.46929	0.583934	0.297576	3.1611
CDC42BPG	sp|Q6DT37|MRCKG-HUMAN	0.990481	0.0964594	0.444635	1.53263	0.512225	0.313564	3.15878
SPCS2	tr|E9PI68|E9PI68-HUMAN	0.590776	0.0122118	0.36968	0.808861	0.999894	0.187054	3.15832
SUPT16H	sp|Q9Y5B9|SP16H-HUMAN	1.19874	0.207538	0.275592	2.09774	0.331327	0.380035	3.15429
	tr|Q59GX7|Q59GX7-HUMAN	1.35294	0.337084	0.200262	2.49226	0.271602	0.429132	3.15274
KLHL12	sp|Q53G59-2|KLH12-HUMAN	0.99552	0.0989868	0.351517	1.64366	0.50568	0.316038	3.15001
GOLGA7	sp|Q7Z5G4|GOGA7-HUMAN	0.622498	0.0151347	0.376977	0.869748	0.998924	0.197628	3.14984
TTC3	sp|P53804|TTC3-HUMAN	0.705765	0.0251823	0.400291	1.01593	0.968142	0.224847	3.13886
DKFZp451C205	tr|Q8N3S0|Q8N3S0-HUMAN	0.788033	0.0391557	0.383001	1.18777	0.85796	0.251104	3.13828
CHAF1B	sp|Q13112|CAF1B-HUMAN	0.566882	0.010526	0.360913	0.769418	0.999988	0.180984	3.13223
TMBIM6	sp|P55061-2|BI1-HUMAN	0.826202	0.0476188	0.404159	1.28397	0.787113	0.264121	3.12812
ERP44	sp|Q9BS26|ERP44-HUMAN	0.833664	0.0495674	0.379084	1.27298	0.772503	0.267059	3.12165
DCAKD	sp|Q8WVC6|DCAKD-HUMAN	1.0467	0.123272	0.354513	1.75345	0.447093	0.335436	3.12041
DTWD1	sp|Q8N5C7|DTWD1-HUMAN	1.07309	0.136215	0.309809	1.78817	0.421508	0.343935	3.12004
TEX15	tr|D3DSV6|D3DSV6-HUMAN	1.03066	0.116049	0.365382	1.71808	0.464143	0.330526	3.11824
RRS1	sp|Q15050|RRS1-HUMAN	0.84319	0.0520301	0.397281	1.3212	0.754103	0.270522	3.1169
MRPL38	sp|Q96DV4|RM38-HUMAN	0.777015	0.0375662	0.377918	1.17448	0.875026	0.249442	3.11502
ADRM1	sp|Q16186|ADRM1-HUMAN	1.23559	0.240325	0.293864	2.21744	0.315408	0.396757	3.11422
CTH	sp|P32929|CGL-HUMAN	1.10834	0.155793	0.319926	1.87641	0.391857	0.356124	3.11223
VPS33A	sp|Q96AX1|VP33A-HUMAN	0.69427	0.0239885	0.384059	1.00483	0.975806	0.223086	3.11211
	tr|Q59G70|Q59G70-HUMAN	0.959036	0.0875566	0.366576	1.58169	0.555053	0.308539	3.10832
NDUFS3	sp|O75489|NDUS3-HUMAN	0.917841	0.0734778	0.425407	1.42125	0.619091	0.295332	3.10783
	tr|B4DQJ7|B4DQJ7-HUMAN	0.969735	0.0920783	0.424513	1.52587	0.539724	0.312914	3.09904
	tr|B3KM43|B3KM43-HUMAN	1.03128	0.118424	0.37184	1.72392	0.463787	0.33369	3.09053
ERGIC3	tr|H0Y5K5|H0Y5K5-HUMAN	1.01613	0.111659	0.344175	1.6808	0.48075	0.32885	3.08995
GINS1	sp|Q14691|PSF1-HUMAN	0.957351	0.0880286	0.353233	1.55189	0.55715	0.309914	3.08909
PER1	sp|O15534|PER1-HUMAN	1.19126	0.211209	0.296324	2.11414	0.338643	0.385789	3.08786
ISOC1	sp|Q96CN7|ISOC1-HUMAN	0.526932	0.00810729	0.338026	0.706968	1	0.170877	3.08369
CNOT8	sp|Q9UFF9|CNOT8-HUMAN	0.862594	0.0585724	0.366548	1.34394	0.714899	0.280569	3.07444
	tr|A0A140VJT8|A0A140VJT8-HUMAN	0.67973	0.0225924	0.371081	0.981289	0.983446	0.221129	3.07391
TTLL4	sp|Q14679|TTLL4-HUMAN	0.558999	0.0103416	0.360292	0.75605	0.999993	0.181921	3.07276
IPO5	sp|O00410-3|IPO5-HUMAN	0.862215	0.0585452	0.405553	1.3442	0.715475	0.280627	3.07245
	tr|A8K7R5|A8K7R5-HUMAN	0.784989	0.0404892	0.37642	1.18502	0.857362	0.256334	3.06237
ELAC2	sp|Q9BQ52|RNZ2-HUMAN	0.858741	0.0580221	0.350677	1.31228	0.721208	0.280501	3.06145
RPL23A	sp|P62750|RL23A-HUMAN	0.593702	0.0132745	0.362949	0.827322	0.999789	0.194062	3.05934
CASS4	sp|Q9NQ75|CASS4-HUMAN	1.16764	0.199656	0.279384	2.03588	0.353764	0.382677	3.05124
GFM1	tr|E5KND7|E5KND7-HUMAN	0.569209	0.0112845	0.359194	0.781322	0.999975	0.186625	3.05002
MRPL36	sp|Q9P0J6|RM36-HUMAN	0.854312	0.0573281	0.374611	1.37215	0.728562	0.280264	3.04824
EMC8	sp|O43402|EMC8-HUMAN	0.95585	0.0899931	0.378962	1.56234	0.558502	0.313845	3.04561
TMEM173	sp|Q86WV6|STING-HUMAN	0.895699	0.0696977	0.36228	1.423	0.653606	0.294745	3.03889
TOP3B	sp|O95985|TOP3B-HUMAN	0.546232	0.00966338	0.35593	0.741612	0.999998	0.179965	3.03522
LMNA	sp|P02545|LMNA-HUMAN	0.822083	0.0497247	0.382856	1.26325	0.787527	0.27125	3.03072
SNX10	tr|B4DJM0|B4DJM0-HUMAN	1.13144	0.179716	0.284607	1.99951	0.378261	0.374681	3.01974
UBTF	sp|P17480|UBF1-HUMAN	0.876269	0.0646963	0.370461	1.38471	0.686676	0.29027	3.01881
GFI1B	tr|A0A1B0GTD0|A0A1B0GTD0-HUMAN	0.974785	0.0993175	0.366484	1.62682	0.531885	0.323299	3.01512
GSR	sp|P00390|GSHR-HUMAN	0.857057	0.059378	0.370017	1.33941	0.721267	0.284317	3.01444
BRAT1	sp|Q6PJG6|BRAT1-HUMAN	1.06582	0.142291	0.322535	1.83872	0.43074	0.35392	3.01147
C16orf59	sp|Q7L2K0|CP059-HUMAN	0.684363	0.0242106	0.381543	0.997395	0.978748	0.227361	3.01003
CTSH	tr|Q6IBC3|Q6IBC3-HUMAN	0.941043	0.086749	0.362312	1.53538	0.579327	0.312984	3.00668
ARF4	sp|P18085|ARF4-HUMAN	0.787257	0.0425371	0.37439	1.2119	0.848848	0.26198	3.00503
EIF3H	tr|B3KS98|B3KS98-HUMAN	0.779617	0.0409324	0.376817	1.18468	0.861988	0.259509	3.0042
DHRS2	sp|Q13268-2|DHRS2-HUMAN	0.959233	0.0939569	0.351046	1.55196	0.552902	0.319551	3.00181
	tr|B4DZC6|B4DZC6-HUMAN	1.09324	0.158607	0.271741	1.93041	0.407445	0.364289	3.00103
SSBP3	sp|Q9BWW4|SSBP3-HUMAN	0.857674	0.0600845	0.365276	1.34019	0.719257	0.285798	3.00098
	tr|H3BVE0|H3BVE0-HUMAN	0.818284	0.0497913	0.346362	1.25714	0.792281	0.272692	3.00076
MFN2	sp|O95140|MFN2-HUMAN	0.866299	0.0625596	0.368561	1.3522	0.703519	0.288722	3.00047
FAM58A	sp|Q8N1B3|FA58A-HUMAN	0.83863	0.055007	0.378441	1.3109	0.754286	0.279665	2.99869
NR2F2	sp|P24468|COT2-HUMAN	0.93637	0.0856441	0.360143	1.50818	0.586062	0.312537	2.99603
C14orf119	sp|Q9NWQ9|CN119-HUMAN	0.944193	0.0888234	0.382717	1.52721	0.574268	0.315648	2.99129
MTHFS	sp|P49914|MTHFS-HUMAN	1.0802	0.152378	0.313785	1.85817	0.418609	0.361374	2.98915
NARFL	sp|Q9H6Q4|NARFL-HUMAN	0.901547	0.0739474	0.362684	1.44175	0.641342	0.301629	2.98893
DCK	tr|D6RFG8|D6RFG8-HUMAN	0.976805	0.10222	0.33505	1.60145	0.528917	0.327311	2.98434
RFC3	sp|P40938|RFC3-HUMAN	0.881821	0.067953	0.353894	1.41176	0.674853	0.295613	2.98302
MYO1D	sp|O94832|MYO1D-HUMAN	0.628949	0.0175872	0.364478	0.893064	0.997428	0.210855	2.98286
ZNF761	tr|A0A087WXT7|A0A087WXT7-HUMAN	1.03618	0.129627	0.323695	1.75393	0.459978	0.347466	2.9821
AUP1	sp|Q9Y679|AUP1-HUMAN	0.802983	0.0468645	0.38711	1.20917	0.818611	0.269597	2.97845
GLMN	sp|Q92990|GLMN-HUMAN	0.818638	0.0506973	0.346785	1.25713	0.789728	0.275043	2.9764
	tr|Q59FB9|Q59FB9-HUMAN	0.854683	0.0606275	0.400643	1.34316	0.722464	0.288091	2.96671
ZBTB1	sp|Q9Y2K1|ZBTB1-HUMAN	1.13892	0.19121	0.270346	2.01366	0.375358	0.383939	2.96641
PHGDHL1	tr|A0A024RE02|A0A024RE02-HUMAN	0.946148	0.0911995	0.35258	1.52866	0.570765	0.319181	2.9643
EGLN2	sp|Q96KS0|EGLN2-HUMAN	0.89862	0.0742318	0.395821	1.39789	0.64509	0.303193	2.96386
HERC1	tr|A0A024R5W0|A0A024R5W0-HUMAN	0.60548	0.0153421	0.3698	0.848271	0.999277	0.20457	2.95976
MAGED2	sp|Q9UNF1|MAGD2-HUMAN	0.716554	0.0302073	0.371245	1.05784	0.948539	0.242553	2.95421
FANCG	sp|O15287|FANCG-HUMAN	1.07504	0.153522	0.289107	1.8394	0.42406	0.364469	2.94961
MYH7B	tr|A0A087X0T3|A0A087X0T3-HUMAN	1.17908	0.22258	0.265118	2.11579	0.352126	0.400129	2.94675
HDAC7	tr|J3KPH8|J3KPH8-HUMAN	0.940864	0.0902769	0.319179	1.5408	0.578015	0.319346	2.94622
UBR4	sp|Q5T4S7|UBR4-HUMAN	0.487501	0.00650738	0.3268	0.645903	1	0.165473	2.9461
WDR89	sp|Q96FK6|WDR89-HUMAN	0.860476	0.0631656	0.344244	1.37048	0.710603	0.29208	2.94603
NUP214	tr|A0A024R8B6|A0A024R8B6-HUMAN	0.370207	0.00216899	0.276794	0.460529	1	0.125801	2.9428
KBTBD2	sp|Q8IY47|KBTB2-HUMAN	0.816909	0.0515424	0.391719	1.27477	0.790012	0.277913	2.93944
ADSS	sp|P30520|PURA2-HUMAN	0.80369	0.0484075	0.368824	1.25047	0.81387	0.273759	2.93576
ZNHIT2	sp|Q9UHR6|ZNHI2-HUMAN	0.875062	0.0680579	0.351341	1.3945	0.683999	0.298126	2.9352
ZNF93	sp|P35789|ZNF93-HUMAN	1.01649	0.124246	0.296395	1.71023	0.481343	0.346767	2.93133
PRKAR2B	sp|P31323|KAP3-HUMAN	0.601871	0.0153884	0.355993	0.846442	0.999335	0.206107	2.92018
ATP6V0D1	tr|F5GYQ1|F5GYQ1-HUMAN	1.50517	0.608966	-0.0357959	3.03332	0.258039	0.518455	2.90318
PLEC	sp|Q15149-3|PLEC-HUMAN	0.92784	0.0879501	0.329821	1.52212	0.596121	0.319628	2.90287
PMVK	sp|Q15126|PMVK-HUMAN	0.838691	0.0588738	0.359831	1.31075	0.746914	0.289307	2.89896
CDCA8	sp|Q53HL2|BOREA-HUMAN	0.629452	0.0187053	0.357896	0.902938	0.996629	0.21728	2.89696
FBXO3	sp|Q9UK99|FBX3-HUMAN	0.956129	0.0995996	0.324691	1.58786	0.555279	0.330075	2.8967
INTS6L	sp|Q5JSJ4|INT6L-HUMAN	0.903304	0.0800367	0.346822	1.48802	0.633747	0.313192	2.88419
	tr|B4DWX3|B4DWX3-HUMAN	0.91479	0.0842656	0.316719	1.48524	0.615445	0.317325	2.88282
CASP8	sp|Q14790-9|CASP8-HUMAN	0.881288	0.0726097	0.392162	1.40129	0.670231	0.305759	2.88229
WDR4	sp|P57081|WDR4-HUMAN	0.947389	0.0970597	0.319643	1.57392	0.567051	0.328845	2.88096
FARP2	sp|O94887|FARP2-HUMAN	0.827343	0.0565538	0.432637	1.24158	0.766089	0.287439	2.87833
NUP210	sp|Q8TEM1|PO210-HUMAN	0.619245	0.0177553	0.353204	0.879595	0.997865	0.21518	2.8778
SIRT7	sp|Q9NRC8|SIR7-HUMAN	0.897654	0.078407	0.318681	1.47281	0.642633	0.311938	2.87767
FBL	sp|P22087|FBRL-HUMAN	0.591813	0.0148402	0.352875	0.830579	0.999597	0.205843	2.87507
GEMIN4	sp|P57678|GEMI4-HUMAN	0.694801	0.028248	0.3764	1.03431	0.965306	0.241899	2.87228
MICU1	tr|A0A0U1RRK1|A0A0U1RRK1-HUMAN	0.841271	0.0607958	0.353781	1.3267	0.740132	0.29309	2.87035
	tr|B4DIS6|B4DIS6-HUMAN	0.870139	0.069614	0.309485	1.37681	0.688707	0.303221	2.86965
TPGS1	sp|Q6ZTW0|TPGS1-HUMAN	0.852444	0.0641391	0.345891	1.39201	0.71993	0.297095	2.86926
FSCN1	sp|Q16658|FSCN1-HUMAN	0.572676	0.0130804	0.344583	0.796882	0.999907	0.199711	2.86753
CYBA	sp|P13498|CY24A-HUMAN	0.803302	0.0506588	0.355098	1.25485	0.80892	0.280187	2.86702
GRHPR	tr|U3KQ56|U3KQ56-HUMAN	0.828434	0.0574348	0.35481	1.33435	0.762969	0.289287	2.8637
TUFM	sp|P49411|EFTU-HUMAN	0.694821	0.028424	0.362425	1.0185	0.964863	0.242644	2.86354
	tr|B2RCE0|B2RCE0-HUMAN	0.918296	0.0868864	0.319495	1.51593	0.60918	0.320991	2.86081
GZF1	sp|Q9H116|GZF1-HUMAN	0.873747	0.071349	0.367128	1.44553	0.681772	0.305709	2.8581
NEDD8-MDP1	tr|E9PL57|E9PL57-HUMAN	0.970082	0.108771	0.304899	1.63335	0.53614	0.339976	2.85338
CHD1L	sp|Q86WJ1|CHD1L-HUMAN	0.819344	0.0554141	0.308852	1.26814	0.778589	0.287305	2.85182
HADHA	sp|P40939|ECHA-HUMAN	0.57886	0.0138166	0.339422	0.807107	0.99983	0.203061	2.85067
AGK	sp|Q53H12|AGK-HUMAN	0.740655	0.0371262	0.356013	1.12282	0.910845	0.26015	2.84703
MRPL19	sp|P49406|RM19-HUMAN	0.810984	0.0535418	0.334337	1.27765	0.792998	0.285321	2.84235
BAG5	sp|Q9UL15-2|BAG5-HUMAN	0.912101	0.0858597	0.311507	1.4791	0.617903	0.321256	2.83917
CTU2	sp|Q2VPK5|CTU2-HUMAN	0.65439	0.0227852	0.35419	0.950607	0.988978	0.230669	2.83692
MSL2	sp|Q9HCI7|MSL2-HUMAN	0.873807	0.0724966	0.330647	1.42416	0.680351	0.308137	2.83578
CLK1	sp|P49759-3|CLK1-HUMAN	1.07396	0.165723	0.34297	1.80469	0.427917	0.379056	2.83325
SPFH1	tr|D3DR65|D3DR65-HUMAN	0.863	0.0692845	0.343632	1.38079	0.698635	0.305005	2.82946
DGKZ	sp|Q13574|DGKZ-HUMAN	0.618185	0.0184083	0.354021	0.891	0.997555	0.219477	2.81663
HPS5	sp|Q9UPZ3|HPS5-HUMAN	0.939714	0.0986258	0.332065	1.55425	0.576115	0.334195	2.81188
SDF4	tr|A0A024R084|A0A024R084-HUMAN	0.851283	0.0665945	0.320545	1.38074	0.717791	0.303141	2.8082
SLC25A21	sp|Q9BQT8|ODC-HUMAN	0.823032	0.0581938	0.313742	1.2992	0.768402	0.293104	2.80799
CSNK2B	tr|Q5SRQ6|Q5SRQ6-HUMAN	1.19559	0.259197	0.202252	2.24411	0.350415	0.425827	2.80769
SREBF2	tr|A0A024R1Q0|A0A024R1Q0-HUMAN	0.66992	0.0255681	0.362599	0.989202	0.980505	0.238686	2.8067
KHDRBS1	sp|Q07666|KHDR1-HUMAN	0.466652	0.00605676	0.312903	0.620511	1	0.166774	2.79812
RNF14	sp|Q9UBS8|RNF14-HUMAN	0.88239	0.0774954	0.338856	1.44129	0.663663	0.315484	2.79694
	tr|B4DJ30|B4DJ30-HUMAN	0.550503	0.0117465	0.343831	0.766493	0.999983	0.196877	2.79618
SGSM3	sp|Q96HU1-2|SGSM3-HUMAN	0.824561	0.0593065	0.323918	1.32036	0.764361	0.295344	2.79187
EXOSC10	sp|Q01780|EXOSX-HUMAN	0.570599	0.0136171	0.335213	0.80656	0.999883	0.204508	2.7901
TMEM43	tr|A0A024R2F9|A0A024R2F9-HUMAN	0.969005	0.11333	0.288772	1.65349	0.536679	0.347413	2.7892
PRSS21	sp|Q9Y6M0|TEST-HUMAN	1.06621	0.166434	0.228186	1.85645	0.435537	0.382629	2.78653
KMT2C	sp|Q8NEZ4-3|KMT2C-HUMAN	0.619412	0.0189822	0.350069	0.894485	0.997131	0.22243	2.78475
hCG_2002731	tr|A0A024QZR3|A0A024QZR3-HUMAN	0.556435	0.0124321	0.334502	0.776202	0.999965	0.200382	2.77688
FTL	tr|Q6S4P3|Q6S4P3-HUMAN	1.32677	0.402532	0.0581932	2.59074	0.30314	0.478194	2.77454
	tr|A8K322|A8K322-HUMAN	0.86462	0.0726067	0.345823	1.39946	0.692314	0.311647	2.77436
ANAPC5	sp|Q9UJX4|APC5-HUMAN	0.595418	0.0164035	0.349527	0.84643	0.999208	0.215103	2.76806
NGLY1	sp|Q96IV0|NGLY1-HUMAN	0.760331	0.0439273	0.339584	1.15843	0.873589	0.275654	2.75828
CENPV	sp|Q7Z7K6-3|CENPV-HUMAN	0.88031	0.0792021	0.343601	1.45084	0.664689	0.319693	2.75361
	tr|B3KNH6|B3KNH6-HUMAN	0.752615	0.0424067	0.342443	1.15437	0.885185	0.273618	2.75061
GTF2H2	sp|Q13888|TF2H2-HUMAN	1.12653	0.212977	0.218314	2.01085	0.391973	0.40966	2.74991
LIN9	tr|H0Y322|H0Y322-HUMAN	0.667395	0.0263778	0.338247	0.99119	0.979715	0.243353	2.7425
NSMCE3	sp|Q96MG7|NSE3-HUMAN	0.837377	0.0654605	0.314251	1.33423	0.737485	0.30554	2.74064
	tr|U3KQV3|U3KQV3-HUMAN	0.905231	0.0896546	0.320264	1.4835	0.62419	0.330771	2.73673
TAF9B	sp|Q9HBM6|TAF9B-HUMAN	1.69837	1.11257	-0.445957	3.90011	0.248694	0.621057	2.73464
CBX1	tr|Q6IBN6|Q6IBN6-HUMAN	0.636679	0.0220957	0.338016	0.932112	0.992741	0.233471	2.72701
ZNHIT6	sp|Q9NWK9|BCD1-HUMAN	0.871335	0.0775601	0.325698	1.41147	0.677959	0.31962	2.72616
ALKBH8	sp|Q96BT7-4|ALKB8-HUMAN	0.619034	0.0198024	0.340533	0.903961	0.996608	0.227324	2.72314
BCR/ABL	tr|A9UF07|A9UF07-HUMAN	0.593477	0.0167661	0.333922	0.852547	0.999154	0.218179	2.72014
BHLHB9	sp|Q6PI77|BHLH9-HUMAN	0.828144	0.0636345	0.310332	1.35679	0.752149	0.304607	2.71873
FADS3	tr|A0A024R564|A0A024R564-HUMAN	0.724461	0.0374425	0.331084	1.10651	0.922772	0.267096	2.71236
LIN52	sp|Q52LA3|LIN52-HUMAN	0.823264	0.0626557	0.355579	1.31636	0.759926	0.304047	2.70768
CLIC2	sp|O15247|CLIC2-HUMAN	0.854035	0.0727246	0.322878	1.3709	0.705837	0.315766	2.70465
RPL10	tr|X5D2T3|X5D2T3-HUMAN	0.747269	0.0426336	0.33276	1.15411	0.889524	0.276312	2.70444
Nbla00052	tr|Q3LID7|Q3LID7-HUMAN	0.792885	0.0543118	0.299505	1.27126	0.812923	0.293925	2.69757
	tr|Q53G69|Q53G69-HUMAN	0.477303	0.00715279	0.312211	0.642956	1	0.177192	2.69371
THEMIS2	sp|Q5TEJ8|THMS2-HUMAN	0.833262	0.0664494	0.290345	1.36201	0.741128	0.30936	2.6935
UBA6	sp|A0AVT1|UBA6-HUMAN	0.760001	0.0459973	0.332501	1.17926	0.868437	0.282197	2.69316
OFD1	sp|O75665|OFD1-HUMAN	0.578296	0.0154263	0.332985	0.826496	0.999657	0.214774	2.69259
NCKAP1L	sp|P55160|NCKPL-HUMAN	1.0537	0.170199	0.229535	1.90006	0.448217	0.391527	2.69126
GATA1	sp|P15976|GATA1-HUMAN	0.735312	0.040529	0.338938	1.13257	0.905707	0.273786	2.68572
ATG12	tr|C1IDX9|C1IDX9-HUMAN	0.770396	0.0488458	0.334953	1.23629	0.85057	0.28688	2.68543
INTS8	sp|Q75QN2|INT8-HUMAN	0.836999	0.0681238	0.324081	1.32752	0.733854	0.311835	2.68411
GALE	sp|Q14376|GALE-HUMAN	1.23491	0.322934	0.0943703	2.32949	0.339624	0.460173	2.68357
VPS26A	sp|O75436|VP26A-HUMAN	0.534694	0.0113527	0.312567	0.749502	0.999994	0.199271	2.68325
PSMC4	tr|A8K2M0|A8K2M0-HUMAN	0.767538	0.0482595	0.330889	1.20093	0.855014	0.286214	2.68169
	tr|Q53FC3|Q53FC3-HUMAN	0.754219	0.0451018	0.322423	1.18938	0.876428	0.281578	2.67854
TARS2	sp|Q9BW92|SYTM-HUMAN	0.864164	0.077851	0.29838	1.43289	0.686813	0.322876	2.67646
RRN3	sp|Q9NYV6|RRN3-HUMAN	0.846296	0.0717354	0.320591	1.37189	0.716974	0.316479	2.6741
PPP5C	tr|A0A024R0Q7|A0A024R0Q7-HUMAN	0.75076	0.0446627	0.342404	1.19666	0.880872	0.281495	2.66704
RPL11	sp|P62913|RL11-HUMAN	0.599923	0.0182438	0.336311	0.874864	0.998472	0.225145	2.66461
CAMKMT	sp|Q7Z624|CMKMT-HUMAN	0.824174	0.0651265	0.280395	1.30958	0.754581	0.309642	2.6617
HEL-S-102	tr|V9HW43|V9HW43-HUMAN	0.853427	0.0749629	0.317534	1.39161	0.703793	0.320817	2.66017
NUBP2	tr|B2RDN3|B2RDN3-HUMAN	0.815262	0.0627283	0.311531	1.30893	0.769623	0.307209	2.65377
TRMT1	tr|A0A024R7I5|A0A024R7I5-HUMAN	1.09304	0.20377	0.203096	1.99179	0.418351	0.412985	2.64668
WDR60	sp|Q8WVS4|WDR60-HUMAN	0.842581	0.0720619	0.311224	1.37721	0.721201	0.318597	2.64466
COG5	sp|Q9UP83-2|COG5-HUMAN	0.736499	0.0420733	0.327867	1.14422	0.90054	0.278504	2.64448
SKAP2	sp|O75563|SKAP2-HUMAN	0.637361	0.0236131	0.332654	0.93986	0.990861	0.241097	2.64359
	tr|B3KMX0|B3KMX0-HUMAN	0.683274	0.0312525	0.338076	1.02762	0.963402	0.25873	2.64087
TMEM70	sp|Q9BUB7|TMM70-HUMAN	0.926953	0.105938	0.278344	1.51717	0.588788	0.35113	2.63991
PIK4CA	tr|Q4LE69|Q4LE69-HUMAN	0.6494	0.0256122	0.326839	0.961029	0.985764	0.24644	2.63512
EIF3E	tr|Q6IAX5|Q6IAX5-HUMAN	0.812377	0.063141	0.311809	1.30302	0.772369	0.309313	2.62639
GDPD1	sp|Q8N9F7|GDPD1-HUMAN	0.78448	0.0551709	0.289567	1.25835	0.820574	0.299415	2.62004
TTLL12	tr|A0A024R4U3|A0A024R4U3-HUMAN	0.83265	0.0700857	0.348319	1.35222	0.736351	0.317945	2.61885
B3GLCT	sp|Q6Y288|B3GLT-HUMAN	0.955413	0.121668	0.238066	1.65934	0.550857	0.365088	2.61694
PPM1D	tr|A0A0S2Z4M2|A0A0S2Z4M2-HUMAN	0.854864	0.0780714	0.32858	1.41418	0.69827	0.32685	2.61546
PDHB	sp|P11177|ODPB-HUMAN	1.4758	0.693651	-0.202096	3.18945	0.282427	0.564343	2.61508
AP2S1	tr|M0QYZ2|M0QYZ2-HUMAN	0.961183	0.125792	0.232293	1.688	0.543575	0.368995	2.60487
PIK3CD	tr|A7E2E0|A7E2E0-HUMAN	0.82737	0.069127	0.301001	1.36059	0.744277	0.317778	2.60361
	tr|B4E1J8|B4E1J8-HUMAN	0.830448	0.070226	0.312315	1.36353	0.738853	0.319107	2.60241
RPS5	sp|P46782|RS5-HUMAN	0.66003	0.0280361	0.327844	0.986305	0.978842	0.253685	2.60177
HPRT1	sp|P00492|HPRT-HUMAN	1.01245	0.155303	0.251017	1.79367	0.487398	0.389239	2.6011
PASK	sp|Q96RG2-2|PASK-HUMAN	0.538207	0.0124265	0.305541	0.750556	0.999983	0.207121	2.59851
AKAP9	sp|Q99996-6|AKAP9-HUMAN	0.388219	0.00336836	0.274511	0.501039	1	0.149497	2.59683
PCNA	tr|Q6FI35|Q6FI35-HUMAN	0.737768	0.0439676	0.321015	1.15447	0.89446	0.284215	2.59581
TERF2	sp|Q15554|TERF2-HUMAN	0.819693	0.0670236	0.306526	1.33212	0.756931	0.315837	2.59531
KIAA0753	sp|Q2KHM9|MOONR-HUMAN	0.762984	0.0505091	0.330332	1.20232	0.854199	0.294557	2.59028
PSMC1	tr|Q53XL8|Q53XL8-HUMAN	0.591729	0.0182867	0.325727	0.856066	0.998732	0.228531	2.58927
ZNF627	sp|Q7L945|ZN627-HUMAN	0.861354	0.0822749	0.275953	1.42492	0.685581	0.333006	2.5866
TMEM147	sp|Q9BVK8|TM147-HUMAN	0.865379	0.0839846	0.283987	1.43751	0.678866	0.334883	2.58412
	tr|A8K3X3|A8K3X3-HUMAN	0.749824	0.0474882	0.315695	1.16233	0.874522	0.290625	2.58004
COX7A2L	sp|O14548|COX7R-HUMAN	1.00158	0.152125	0.21249	1.79733	0.498384	0.389417	2.572
PCNT	sp|O95613|PCNT-HUMAN	0.501954	0.00962251	0.310189	0.69903	1	0.195425	2.56852
NUP107	sp|P57740|NU107-HUMAN	0.743371	0.0464548	0.328432	1.16481	0.883108	0.289941	2.56387
HPF1	sp|Q9NWY4|HPF1-HUMAN	1.14943	0.265669	0.0936961	2.17145	0.385926	0.448423	2.56327
SYNGR2	sp|O43760-2|SNG2-HUMAN	0.920982	0.109545	0.311029	1.55891	0.594347	0.359373	2.56275
ZFP36L2	sp|P47974|TISD-HUMAN	0.857915	0.0825699	0.290235	1.44995	0.689512	0.33494	2.5614
AKAP11	sp|Q9UKA4|AKA11-HUMAN	0.55837	0.0148913	0.320528	0.791697	0.999852	0.218547	2.55492
RABEPK	tr|A0A024R8A0|A0A024R8A0-HUMAN	0.720053	0.0411894	0.310861	1.13341	0.916111	0.281857	2.55468
INTU	sp|Q9ULD6|INTU-HUMAN	0.788481	0.0596764	0.326071	1.29555	0.806717	0.30982	2.54496
RPS11	sp|P62280|RS11-HUMAN	0.598368	0.0197977	0.32092	0.884117	0.997844	0.235147	2.54466
DNAJB6	sp|O75190|DNJB6-HUMAN	0.823412	0.0713062	0.286056	1.34966	0.74579	0.3243	2.53905
POLR1C	sp|O15160|RPAC1-HUMAN	0.819526	0.0700537	0.305239	1.34255	0.752338	0.322963	2.53752
POLE2	sp|P56282|DPOE2-HUMAN	0.910417	0.107717	0.24512	1.55739	0.607554	0.360497	2.52545
DDX31	sp|Q9H8H2|DDX31-HUMAN	0.838034	0.0773757	0.262766	1.38344	0.719806	0.331926	2.52477
FRG1	sp|Q14331|FRG1-HUMAN	0.811448	0.0681853	0.288991	1.32416	0.764878	0.321799	2.5216
POLR2A	sp|P24928|RPB1-HUMAN	0.581841	0.0180563	0.316945	0.845413	0.999071	0.230946	2.51938
MAPK6	sp|Q16659|MK06-HUMAN	0.624466	0.0240767	0.318728	0.927812	0.992244	0.248479	2.51315
BRCA1	sp|P38398-7|BRCA1-HUMAN	0.571588	0.016933	0.314695	0.824906	0.999503	0.227658	2.51073
MRPL20	sp|Q9BYC9|RM20-HUMAN	0.798958	0.0647171	0.286936	1.30107	0.785316	0.318409	2.50922
CALU	sp|O43852-3|CALU-HUMAN	0.661293	0.0305735	0.308865	1.00763	0.973633	0.26441	2.50101
FZR1	sp|Q9UM11|FZR1-HUMAN	0.846235	0.0820236	0.295807	1.40662	0.704329	0.338437	2.50042
PPM1F	sp|P49593|PPM1F-HUMAN	0.547929	0.0145426	0.305978	0.784211	0.999911	0.220088	2.48959
WDR41	tr|A0A0S2Z5D8|A0A0S2Z5D8-HUMAN	0.873117	0.0937981	0.280058	1.50208	0.66067	0.350772	2.48913
MAGEC1	sp|O60732|MAGC1-HUMAN	0.832142	0.0778417	0.283746	1.37807	0.726293	0.335281	2.48193
PITRM1	sp|Q5JRX3-2|PREP-HUMAN	0.873195	0.0945335	0.296332	1.44731	0.659986	0.352113	2.47987
CHD6	sp|Q8TD26|CHD6-HUMAN	0.775297	0.0588036	0.30274	1.25289	0.822941	0.312776	2.47876
RPL27A	tr|Q6NZ52|Q6NZ52-HUMAN	0.501953	0.0103356	0.296048	0.706972	1	0.202537	2.47833
TRIM13	sp|O60858-3|TRI13-HUMAN	0.951383	0.133536	0.183727	1.65013	0.55292	0.3841	2.47692
RNF169	sp|Q8NCN4|RN169-HUMAN	0.75123	0.0521318	0.298066	1.21278	0.862044	0.303933	2.47169
GALNT2	tr|A0A1L7NY41|A0A1L7NY41-HUMAN	0.949497	0.133212	0.255337	1.67773	0.555026	0.384395	2.47011
RFC2	sp|P35250|RFC2-HUMAN	0.519966	0.0120003	0.3103	0.736071	0.999994	0.210679	2.46805
WDR81	sp|Q562E7|WDR81-HUMAN	0.579468	0.0185508	0.314765	0.864497	0.998991	0.235045	2.46534
LARP1B	sp|Q659C4|LAR1B-HUMAN	0.961339	0.140586	0.188821	1.69254	0.541062	0.390027	2.4648
ZFP106	tr|A0A024R9R5|A0A024R9R5-HUMAN	0.544369	0.0145228	0.300772	0.777618	0.999922	0.221377	2.45902
CMBL	sp|Q96DG6|CMBL-HUMAN	0.768759	0.0577781	0.302489	1.24135	0.83198	0.312674	2.45866
SUZ12	sp|Q15022|SUZ12-HUMAN	0.61546	0.0237495	0.314569	0.925279	0.993707	0.250396	2.45795
RASSF1	sp|Q9NS23-5|RASF1-HUMAN	0.750806	0.0528506	0.289501	1.2074	0.860808	0.306194	2.45206
CEP57	sp|Q86XR8|CEP57-HUMAN	0.733472	0.0481527	0.304597	1.17007	0.88774	0.299176	2.45164
BARD1	sp|Q99728|BARD1-HUMAN	0.571888	0.0178434	0.30868	0.845214	0.999325	0.233576	2.4484
HDAC3	sp|O15379-2|HDAC3-HUMAN	0.748965	0.0530341	0.289196	1.20827	0.86216	0.307479	2.43582
LRIF1	sp|Q5T3J3|LRIF1-HUMAN	1.11419	0.259829	0.102779	2.12693	0.411355	0.457493	2.43542
USP48	sp|Q86UV5-8|UBP48-HUMAN	0.609027	0.0233128	0.305604	0.906384	0.994776	0.250704	2.42927
RUSC2	sp|Q8N2Y8|RUSC2-HUMAN	0.882737	0.103072	0.227967	1.53	0.642538	0.363696	2.42713
NVL	sp|O15381|NVL-HUMAN	0.890782	0.107092	0.220545	1.54182	0.630714	0.367373	2.42474
ZNF280B	tr|A0A0D9SEJ8|A0A0D9SEJ8-HUMAN	0.871435	0.0983009	0.25422	1.48558	0.659118	0.359786	2.4221
COX7A2	tr|H0UI06|H0UI06-HUMAN	0.780573	0.0633165	0.278732	1.30015	0.808404	0.322363	2.42141
	tr|B3KRQ2|B3KRQ2-HUMAN	0.770313	0.0600944	0.289292	1.2668	0.82561	0.318236	2.42057
SETDB1	sp|Q15047|SETB1-HUMAN	0.560566	0.0168807	0.302308	0.820783	0.99964	0.231776	2.41857
EED	sp|O75530-2|EED-HUMAN	1.17698	0.328132	0.065567	2.30731	0.378604	0.486693	2.41832
	tr|Q59ER5|Q59ER5-HUMAN	0.698553	0.0408127	0.305028	1.09849	0.93217	0.2892	2.41547
PRKAB1	tr|A0A024RBN1|A0A024RBN1-HUMAN	0.595893	0.0217072	0.297441	0.886419	0.996954	0.247248	2.4101
MAD2L2	tr|B1AK44|B1AK44-HUMAN	1.00404	0.175456	0.176183	1.84949	0.496151	0.417189	2.40668
CTBP1	sp|Q13363|CTBP1-HUMAN	0.861113	0.0952003	0.239572	1.47679	0.673693	0.35831	2.40326
CHCHD3	tr|C9JRZ6|C9JRZ6-HUMAN	0.720257	0.0466221	0.292543	1.16045	0.902439	0.299784	2.40259
	tr|B4DLV7|B4DLV7-HUMAN	0.796196	0.0698068	0.285908	1.32316	0.779757	0.33184	2.39934
MTOR	sp|P42345|MTOR-HUMAN	0.524789	0.0132	0.295465	0.747394	0.999982	0.218928	2.39708
WDSUB1	tr|D3DPA6|D3DPA6-HUMAN	0.495281	0.0104794	0.29525	0.696894	1	0.206689	2.39627
UBR2	sp|Q8IWV8-4|UBR2-HUMAN	0.848405	0.0904099	0.244668	1.43482	0.692929	0.354409	2.39386
HEL-S-99n	tr|V9HW88|V9HW88-HUMAN	0.909066	0.119209	0.226921	1.59363	0.603869	0.379804	2.39352
DAPK1	sp|P53355-3|DAPK1-HUMAN	0.75289	0.0564027	0.252916	1.21493	0.850945	0.315441	2.38678
EIF2B5	sp|Q13144|EI2BE-HUMAN	0.797096	0.0711283	0.244655	1.31273	0.776611	0.334588	2.38232
RABIF	sp|P47224|MSS4-HUMAN	0.669726	0.0355204	0.277587	1.05927	0.960148	0.281411	2.37988
DDX51	sp|Q8N8A6|DDX51-HUMAN	0.685598	0.0391282	0.291011	1.0801	0.944018	0.28852	2.37626
GDI1	sp|P31150|GDIA-HUMAN	0.962014	0.151787	0.253795	1.7225	0.538835	0.404982	2.37545
SECISBP2	sp|Q96T21|SEBP2-HUMAN	0.549913	0.0163056	0.289278	0.801231	0.999788	0.232207	2.36821
AKR1B10	sp|O60218|AK1BA-HUMAN	1.22028	0.397298	-0.0335085	2.43134	0.363152	0.516534	2.36244
NOM1	sp|Q5C9Z4|NOM1-HUMAN	0.909347	0.122982	0.200308	1.618	0.60199	0.385648	2.35797
HSD17B7	sp|P56937|DHB7-HUMAN	0.817002	0.080267	0.265332	1.39811	0.740834	0.346773	2.35601
TRMT12	sp|Q53H54|TYW2-HUMAN	0.863037	0.100106	0.239651	1.53696	0.667451	0.366607	2.35412
MGC3731	tr|A0A024R1M6|A0A024R1M6-HUMAN	0.696021	0.0425865	0.265304	1.10767	0.929627	0.296492	2.34752
LCOR	sp|Q96JN0-3|LCOR-HUMAN	0.750772	0.0576563	0.281787	1.23797	0.850352	0.319827	2.34743
HSD17B11	sp|Q8NBQ5|DHB11-HUMAN	0.649148	0.0324902	0.295746	0.999829	0.974201	0.277672	2.33782
	tr|A8K509|A8K509-HUMAN	0.973348	0.164424	0.157043	1.76173	0.526202	0.416595	2.33643
GALNT1	sp|Q10472|GALT1-HUMAN	0.866542	0.103558	0.235479	1.50061	0.660826	0.371366	2.33339
PSMD13	tr|A0A024R201|A0A024R201-HUMAN	0.583664	0.0213339	0.293928	0.867494	0.997817	0.250249	2.33233
TRIM24	sp|O15164|TIF1A-HUMAN	0.697879	0.0436067	0.290575	1.12164	0.926022	0.299224	2.3323
TUBGCP6	sp|Q96RT7|GCP6-HUMAN	0.835735	0.0897314	0.233086	1.43049	0.708281	0.358429	2.33166
ATP5C1	sp|P36542|ATPG-HUMAN	0.836062	0.0900643	0.235454	1.42308	0.707558	0.358953	2.32917
HSPBP1	sp|Q9NZL4-3|HPBP1-HUMAN	0.52143	0.0136406	0.28784	0.749253	0.999979	0.223986	2.32796
CEP85	sp|Q6P2H3|CEP85-HUMAN	0.414592	0.0054772	0.27062	0.561415	1	0.178508	2.32254
UBE3B	tr|B9EK57|B9EK57-HUMAN	0.728838	0.0524168	0.278354	1.19516	0.88187	0.314126	2.32021
COPS5	sp|Q92905|CSN5-HUMAN	0.788425	0.0718107	0.259028	1.3156	0.785099	0.339887	2.31967
NLRP1	sp|Q9C000|NLRP1-HUMAN	0.731688	0.053313	0.264889	1.194	0.877392	0.315566	2.31865
GGCX	tr|A7YA96|A7YA96-HUMAN	0.791296	0.0731125	0.258951	1.28402	0.779899	0.341709	2.3157
ALKBH4	sp|Q9NXW9|ALKB4-HUMAN	0.828785	0.0881015	0.23956	1.45453	0.717974	0.358137	2.31415
MYCBP2	sp|O75592|MYCB2-HUMAN	0.597067	0.0237431	0.300515	0.903466	0.995538	0.258075	2.31354
2019-03-07	sp|Q9H992|MARH7-HUMAN	1.03763	0.216904	0.0992723	1.95075	0.467795	0.44884	2.31181
HOXB9	sp|P17482|HXB9-HUMAN	0.468765	0.00904671	0.280314	0.662071	1	0.202904	2.31028
RPS16	sp|P62249|RS16-HUMAN	0.587529	0.0223656	0.29579	0.881774	0.997093	0.254543	2.30817
RPS6KB1	sp|P23443|KS6B1-HUMAN	0.67313	0.0386644	0.256973	1.06057	0.951778	0.292117	2.30432
LIMK2	sp|P53671-3|LIMK2-HUMAN	0.685141	0.0415458	0.271109	1.10189	0.938794	0.297498	2.30301
CCDC112	sp|Q8NEF3-2|CC112-HUMAN	0.760775	0.0631925	0.254566	1.26367	0.829361	0.330428	2.30239
SR-A1	tr|A0A024QZH6|A0A024QZH6-HUMAN	0.746608	0.0587778	0.2711	1.24702	0.852027	0.324724	2.29921
	tr|Q59FR2|Q59FR2-HUMAN	0.649099	0.0336522	0.284399	1.01941	0.972116	0.282615	2.29676
CNKSR3	sp|Q6P9H4|CNKR3-HUMAN	1.79575	1.98154	-0.982089	4.6339	0.262424	0.783891	2.29082
BRF1	sp|Q92994|TF3B-HUMAN	0.833902	0.0924519	0.228114	1.44021	0.707559	0.364622	2.28703
ATP6AP1	sp|Q15904|VAS1-HUMAN	0.745534	0.0593299	0.263202	1.21701	0.85192	0.326715	2.28191
E2F7	sp|Q96AV8|E2F7-HUMAN	0.771362	0.0682693	0.26269	1.29042	0.809228	0.338731	2.27721
TAX1BP1	tr|B8ZZD4|B8ZZD4-HUMAN	0.815155	0.0851508	0.240436	1.39053	0.736781	0.357976	2.27712
TYK2	tr|A0A024R7E4|A0A024R7E4-HUMAN	0.720272	0.051911	0.252204	1.18343	0.890228	0.316325	2.277
	tr|B3KXY9|B3KXY9-HUMAN	0.8462	0.0989325	0.222233	1.46695	0.68757	0.371703	2.27655
CNNM3	sp|Q8NE01|CNNM3-HUMAN	0.729534	0.0548012	0.247793	1.18441	0.876029	0.320885	2.27351
SPTLC2	tr|A0A024R6H1|A0A024R6H1-HUMAN	0.711011	0.049448	0.236427	1.13927	0.90313	0.312751	2.27341
YEATS2	sp|Q9ULM3|YETS2-HUMAN	0.514833	0.0136489	0.287487	0.745867	0.999984	0.226925	2.26874
CTU1	sp|Q7Z7A3|CTU1-HUMAN	0.587582	0.0231819	0.282793	0.883887	0.996623	0.259123	2.26758
TBC1D7	sp|Q9P0N9|TBCD7-HUMAN	0.835847	0.0950129	0.243202	1.40672	0.702826	0.368778	2.26653
RCC1	tr|A0A0S2Z404|A0A0S2Z404-HUMAN	0.913458	0.135834	0.186335	1.64874	0.592823	0.403474	2.26398
USP5	sp|P45974|UBP5-HUMAN	0.75106	0.0622923	0.251136	1.24082	0.840719	0.332309	2.26012
NTPCR	tr|Q5TDF0|Q5TDF0-HUMAN	0.721212	0.0533692	0.251655	1.19998	0.886242	0.320319	2.25154
	tr|Q53FW2|Q53FW2-HUMAN	0.709435	0.0500292	0.271212	1.14469	0.90304	0.315282	2.25016
IDI1	sp|Q13907-2|IDI1-HUMAN	0.846715	0.101572	0.207631	1.50158	0.684729	0.3764	2.24951
NIT2	sp|Q9NQR4|NIT2-HUMAN	0.711587	0.0509396	0.265196	1.1829	0.899353	0.317176	2.24351
	tr|Q53EP4|Q53EP4-HUMAN	0.430897	0.00685092	0.266018	0.596563	1	0.192088	2.24322
FBRS	tr|J3KNZ9|J3KNZ9-HUMAN	0.9376	0.154291	0.138917	1.72073	0.56311	0.418941	2.23802
	tr|B3KMQ6|B3KMQ6-HUMAN	0.734349	0.0580629	0.231916	1.21193	0.864869	0.328131	2.23798
PIAS4	sp|Q8N2W9|PIAS4-HUMAN	1.17086	0.376839	-0.0775861	2.38332	0.390176	0.524292	2.23322
UBN1	sp|Q9NPG3|UBN1-HUMAN	0.61688	0.0291404	0.288196	0.942727	0.987594	0.276724	2.22922
CASC5	tr|Q05C46|Q05C46-HUMAN	0.901135	0.133109	0.17202	1.61762	0.606797	0.404868	2.22575
HBEBP2BPA	tr|Q1HDL3|Q1HDL3-HUMAN	1.03992	0.236714	0.197757	1.93796	0.46729	0.467856	2.22274
TMEM38B	sp|Q9NVV0|TM38B-HUMAN	0.913318	0.141649	0.189994	1.60946	0.591076	0.412083	2.21634
XPO1	sp|O14980|XPO1-HUMAN	0.425299	0.00666925	0.264658	0.587171	1	0.192019	2.21488
GNL3L	tr|A0A024R9Y6|A0A024R9Y6-HUMAN	0.502016	0.0129685	0.283155	0.727199	0.999994	0.226844	2.21304
RRM1	sp|P23921|RIR1-HUMAN	0.543187	0.0179099	0.276155	0.806196	0.999679	0.246375	2.20471
OFD1	sp|O75665-3|OFD1-HUMAN	0.790932	0.0807334	0.208649	1.3088	0.769074	0.359242	2.20167
RRP7A	sp|Q9Y3A4|RRP7A-HUMAN	0.769753	0.07253	0.230913	1.29837	0.803708	0.349871	2.20011
AES	tr|K7ELE3|K7ELE3-HUMAN	0.775235	0.0748592	0.2419	1.30471	0.794318	0.352931	2.19657
HEL-S-113	tr|V9HW79|V9HW79-HUMAN	0.715162	0.0544064	0.225417	1.17544	0.888987	0.326152	2.19272
TRNAU1AP	sp|Q9NX07|TSAP1-HUMAN	0.856948	0.112627	0.210118	1.5371	0.66504	0.391622	2.1882
KIAA1542	tr|A0A024RCA1|A0A024RCA1-HUMAN	0.486975	0.0117496	0.271146	0.700239	0.999999	0.22259	2.18777
ALAS1	tr|Q5JAM2|Q5JAM2-HUMAN	0.795198	0.0838302	0.235	1.37458	0.760325	0.364104	2.18399
	tr|Q59GR2|Q59GR2-HUMAN	0.659002	0.0395657	0.265467	1.0618	0.956765	0.301837	2.1833
POC5	sp|Q8NA72|POC5-HUMAN	0.599997	0.0273507	0.265085	0.922036	0.992212	0.275635	2.17678
H3F3B	tr|K7ES00|K7ES00-HUMAN	0.929352	0.157453	0.134519	1.70556	0.570655	0.426968	2.17663
TYW3	sp|Q6IPR3|TYW3-HUMAN	0.860909	0.11604	0.193042	1.53848	0.658479	0.395682	2.17576
DDX54	sp|Q8TDD1-2|DDX54-HUMAN	0.782044	0.0791017	0.237582	1.35499	0.780817	0.359635	2.17455
	tr|B4DHW9|B4DHW9-HUMAN	0.755828	0.0692929	0.219807	1.27835	0.823187	0.348274	2.17021
hCG_1994130	tr|B2R4W8|B2R4W8-HUMAN	0.710072	0.0540502	0.24796	1.19185	0.893814	0.327413	2.16873
PCTK2	tr|A0A024RBH0|A0A024RBH0-HUMAN	0.763458	0.0722907	0.234839	1.29756	0.810507	0.352173	2.16785
RANBP10	tr|R4GMX8|R4GMX8-HUMAN	0.88958	0.133418	0.182213	1.62276	0.618789	0.410603	2.16652
ST3GAL2	tr|A0A024QZA4|A0A024QZA4-HUMAN	0.857925	0.116193	0.155387	1.53381	0.661588	0.39732	2.15928
TYMS	sp|P04818|TYSY-HUMAN	0.863829	0.120036	0.181441	1.56062	0.652852	0.401077	2.15377
VPS41	sp|P49754|VPS41-HUMAN	0.503865	0.0139065	0.270524	0.744733	0.999987	0.234042	2.15288
EHMT1	sp|Q9H9B1|EHMT1-HUMAN	0.533291	0.0174766	0.276177	0.793686	0.999792	0.247893	2.1513
HNRNPU	sp|Q00839|HNRPU-HUMAN	0.517926	0.0155522	0.277479	0.756437	0.999945	0.240784	2.151
HBE1	sp|P02100|HBE-HUMAN	0.871483	0.124713	0.162754	1.56879	0.642041	0.405226	2.15061
URB1	sp|O60287|NPA1P-HUMAN	0.870694	0.124569	0.152942	1.56055	0.642953	0.405359	2.14796
RPL37A	sp|P61513|RL37A-HUMAN	0.525775	0.0165877	0.276803	0.782154	0.999884	0.244959	2.14638
	tr|B4DEF8|B4DEF8-HUMAN	0.818643	0.0976345	0.182782	1.43894	0.71918	0.381687	2.1448
HEL-S-124m	tr|V9HW84|V9HW84-HUMAN	0.510453	0.01477	0.27635	0.749183	0.999972	0.238086	2.14398
	tr|B2RD51|B2RD51-HUMAN	1.14548	0.374671	-0.086677	2.33577	0.405839	0.534364	2.14363
NEK4	sp|P51957|NEK4-HUMAN	0.673729	0.0450293	0.25024	1.10405	0.937921	0.314965	2.13906
	tr|B4DY90|B4DY90-HUMAN	0.447912	0.00881132	0.263733	0.628478	1	0.209569	2.1373
TRPM7	tr|A0A024R5V1|A0A024R5V1-HUMAN	0.98284	0.205276	0.076446	1.91812	0.5151	0.460984	2.13205
NDUFS1	sp|P28331-2|NDUS1-HUMAN	0.752029	0.0707509	0.212064	1.2842	0.824398	0.353697	2.1262
DLD	sp|P09622|DLDH-HUMAN	0.578894	0.0249553	0.263781	0.890037	0.996159	0.272887	2.12137
TRUB2	sp|O95900|TRUB2-HUMAN	0.915783	0.15637	0.114939	1.71123	0.584325	0.431801	2.12084
DNAJB11	sp|Q9UBS4|DJB11-HUMAN	0.5722	0.023968	0.267567	0.884772	0.997139	0.270563	2.11485
ZNF608	sp|Q9ULD9|ZN608-HUMAN	1.4212	0.912289	-0.441661	3.29259	0.323989	0.672065	2.11468
	tr|B4DHQ3|B4DHQ3-HUMAN	0.673206	0.0460959	0.249531	1.10032	0.936008	0.318921	2.11089
THAP11	sp|Q96EK4|THA11-HUMAN	0.717986	0.0598374	0.236359	1.21939	0.87552	0.340699	2.10739
TPT1	tr|A0A0B4J2C3|A0A0B4J2C3-HUMAN	0.70936	0.0570956	0.249866	1.19891	0.888072	0.336849	2.10587
LOC202789	tr|A4D1R5|A4D1R5-HUMAN	1.35663	0.767951	-0.394738	3.09809	0.338438	0.64596	2.10018
RMDN1	sp|Q96DB5|RMD1-HUMAN	0.780803	0.084509	0.194456	1.35672	0.774582	0.372315	2.09716
RPUSD3	sp|Q6P087|RUSD3-HUMAN	0.831648	0.108776	0.245607	1.42608	0.695131	0.396577	2.09707
	tr|B2R694|B2R694-HUMAN	1.12708	0.368221	-0.0659615	2.33891	0.416831	0.538393	2.09341
BCCIP	sp|Q9P287-2|BCCIP-HUMAN	0.698982	0.0544753	0.201101	1.17899	0.901425	0.333913	2.0933
FDPS	sp|P14324|FPPS-HUMAN	0.896526	0.14777	0.130988	1.66203	0.606103	0.428776	2.0909
FAF1	sp|Q9UNN5|FAF1-HUMAN	0.723226	0.0626254	0.224498	1.21167	0.865634	0.34602	2.09013
PSMA1	sp|P25786-2|PSA1-HUMAN	0.763894	0.0780417	0.203452	1.31894	0.800992	0.365704	2.08883
PCM1	tr|E7EV93|E7EV93-HUMAN	1.18339	0.449532	-0.129707	2.55447	0.391661	0.566568	2.0887
ATP2A3	sp|Q93084-5|AT2A3-HUMAN	0.682959	0.0499792	0.219647	1.14183	0.921926	0.327341	2.08639
	tr|B2R4A5|B2R4A5-HUMAN	0.67055	0.0466553	0.227957	1.10055	0.936401	0.322121	2.08167
FAM126A	sp|Q9BYI3|HYCCI-HUMAN	0.697138	0.0545495	0.218119	1.14537	0.902638	0.335025	2.08086
PHF19	sp|Q5T6S3-2|PHF19-HUMAN	0.726162	0.0644359	0.214155	1.25295	0.859655	0.349567	2.07732
RCC1L	sp|Q96I51|RCC1L-HUMAN	0.863891	0.130465	0.136013	1.53402	0.646848	0.418108	2.06619
TOP2B	sp|Q02880|TOP2B-HUMAN	0.544652	0.0206335	0.260994	0.823309	0.999238	0.263735	2.06515
FASTKD5	sp|Q7L8L6|FAKD5-HUMAN	0.738209	0.0696446	0.200269	1.25164	0.839401	0.35749	2.06498
CALCOCO2	sp|Q13137-4|CACO2-HUMAN	0.692769	0.0540308	0.230517	1.1431	0.906872	0.335531	2.0647
RXRB	sp|P28702-3|RXRB-HUMAN	0.619817	0.034812	0.251209	0.982004	0.979207	0.301024	2.05903
SHQ1	sp|Q6PI26|SHQ1-HUMAN	0.739806	0.0707353	0.224051	1.27881	0.836041	0.359501	2.05787
PNKD	sp|Q8N490-2|PNKD-HUMAN	0.788784	0.0914532	0.147635	1.3692	0.757548	0.383391	2.05739
BOP1	sp|Q14137|BOP1-HUMAN	0.715906	0.0625235	0.231783	1.15811	0.872056	0.349274	2.0497
TAOK1	tr|A0A024QZ70|A0A024QZ70-HUMAN	0.569555	0.0251183	0.251667	0.882107	0.996696	0.278266	2.0468
NOC3L	sp|Q8WTT2|NOC3L-HUMAN	0.502538	0.0152435	0.254744	0.755196	0.999972	0.245682	2.04548
CLTC	tr|A0A087WVQ6|A0A087WVQ6-HUMAN	0.365817	0.00428103	0.239075	0.495691	1	0.178859	2.04528
SUPT4H1	sp|P63272|SPT4H-HUMAN	0.806981	0.101385	0.217219	1.40645	0.727808	0.39457	2.04522
KLHL7	sp|Q8IXQ5|KLHL7-HUMAN	0.726936	0.0671196	0.211907	1.24859	0.854058	0.356392	2.03971
SMAD5	sp|Q99717|SMAD5-HUMAN	0.760609	0.0805448	0.208828	1.33863	0.800528	0.373128	2.03847
LIN37	sp|Q96GY3|LIN37-HUMAN	0.686347	0.0534574	0.249524	1.14604	0.912543	0.336868	2.03743
KIAA1551	sp|Q9HCM1|K1551-HUMAN	0.632716	0.0386176	0.247982	1.01149	0.969189	0.310587	2.03716
RAD54L	sp|Q92698|RAD54-HUMAN	1.0678	0.313722	-0.0470642	2.18613	0.451715	0.524545	2.03567
CBWD3	sp|Q5JTY5|CBWD3-HUMAN	0.885346	0.14848	0.118751	1.65493	0.616975	0.435232	2.03419
AP4B1	sp|Q9Y6B7|AP4B1-HUMAN	0.599685	0.0312669	0.250995	0.955831	0.98821	0.294862	2.03378
CENPU	sp|Q71F23|CENPU-HUMAN	0.662605	0.0468408	0.234249	1.09898	0.940493	0.326631	2.0286
TNPO3	tr|A0A024R794|A0A024R794-HUMAN	0.565979	0.024951	0.250339	0.876614	0.996999	0.27909	2.02795
TXNDC17	tr|I3L2R6|I3L2R6-HUMAN	0.766436	0.084155	0.180189	1.34594	0.789628	0.378498	2.02494
CCDC61	sp|Q9Y6R9|CCD61-HUMAN	0.575034	0.0267869	0.253775	0.901996	0.995291	0.284622	2.02035
EXPH5	tr|Q149M6|Q149M6-HUMAN	0.669266	0.0493196	0.224357	1.10348	0.93179	0.331826	2.01692
TRPV2	sp|Q9Y5S1|TRPV2-HUMAN	0.679349	0.0523653	0.195975	1.13987	0.919428	0.336844	2.01681
AARSD1	sp|Q9BTE6-3|AASD1-HUMAN	0.827394	0.115266	0.149175	1.51206	0.694413	0.410335	2.01639
TTC12	sp|Q9H892-2|TTC12-HUMAN	0.690988	0.0561182	0.207443	1.18517	0.903958	0.342832	2.01553
TBL3	sp|Q12788|TBL3-HUMAN	0.637437	0.040925	0.234096	1.03919	0.96345	0.317364	2.00854
CCDC8	sp|Q9H0W5|CCDC8-HUMAN	0.671286	0.0503502	0.221683	1.13855	0.92853	0.334267	2.00824
USP4	sp|Q13107|UBP4-HUMAN	0.644241	0.0427528	0.236211	1.05549	0.957336	0.320947	2.00731
ATAD5	sp|Q96QE3|ATAD5-HUMAN	0.613958	0.0352727	0.248945	0.994863	0.980084	0.305901	2.00705
TOP2A	sp|P11388-4|TOP2A-HUMAN	0.391363	0.00586256	0.242152	0.543271	1	0.195643	2.0004
RHAG	tr|A0A0A0MQS8|A0A0A0MQS8-HUMAN	0.7406	0.0753732	0.188966	1.28522	0.827632	0.370702	1.99783
	tr|B3KVH4|B3KVH4-HUMAN	0.685586	0.0553676	0.202225	1.15212	0.909259	0.343215	1.99754
AGPS	sp|O00116|ADAS-HUMAN	0.534178	0.0204589	0.254508	0.820825	0.999436	0.267766	1.99494
LMNB1	sp|P20700|LMNB1-HUMAN	0.684643	0.0552168	0.237347	1.15299	0.910209	0.343219	1.99477
CDK5	tr|A0A090N7W4|A0A090N7W4-HUMAN	0.482212	0.013606	0.249472	0.713559	0.999995	0.241895	1.99348
LPCAT2	sp|Q7L5N7|PCAT2-HUMAN	0.71747	0.0668883	0.227511	1.20986	0.862676	0.360472	1.99036
SLX4IP	sp|Q5VYV7|SLX4I-HUMAN	0.631191	0.0401058	0.206575	1.01222	0.967234	0.31728	1.98938
ACAA1	tr|A0A024R2M6|A0A024R2M6-HUMAN	0.700476	0.0611416	0.201979	1.20931	0.887116	0.353	1.98435
AGPAT3	sp|Q9NRZ7-3|PLCC-HUMAN	0.763614	0.086423	0.157945	1.37903	0.789329	0.384982	1.9835
ACTR3	sp|P61158|ARP3-HUMAN	0.636742	0.0418452	0.225514	1.04776	0.962116	0.321262	1.982
ZSCAN29	sp|Q8IWY8|ZSC29-HUMAN	0.706797	0.063629	0.244632	1.15042	0.877455	0.356889	1.98044
MSMO1	sp|Q15800|MSMO1-HUMAN	0.722223	0.0697964	0.215405	1.24354	0.853469	0.365801	1.97436
BAHD1	tr|A0A024R9K2|A0A024R9K2-HUMAN	0.716477	0.067612	0.201722	1.23996	0.862226	0.362919	1.97421
PRKACA	tr|A0A024R7J0|A0A024R7J0-HUMAN	0.479298	0.0135433	0.244556	0.707611	0.999996	0.242804	1.97401
MAML2	sp|Q8IZL2|MAML2-HUMAN	0.88138	0.155224	0.11111	1.66817	0.618321	0.447009	1.97173
TRAFD1	sp|O14545|TRAD1-HUMAN	1.0899	0.363284	-0.0898145	2.30205	0.440453	0.553014	1.97083
	tr|A0A140VK43|A0A140VK43-HUMAN	0.835725	0.125806	0.145188	1.54854	0.678371	0.424412	1.96914
GTPBP4	sp|Q9BZE4|NOG1-HUMAN	0.654144	0.0473079	0.227923	1.0864	0.944096	0.332501	1.96734
	tr|A8K1B1|A8K1B1-HUMAN	0.647991	0.045587	0.232924	1.09923	0.950392	0.329497	1.96661
MAP2K3	sp|P46734-3|MP2K3-HUMAN	0.68223	0.0560398	0.198867	1.16423	0.910258	0.34699	1.96614
TAMM41	sp|Q96BW9|TAM41-HUMAN	0.715789	0.0679537	0.194785	1.23316	0.862203	0.364185	1.96546
ARMC10	sp|Q8N2F6|ARM10-HUMAN	0.679251	0.0553348	0.20058	1.16325	0.913643	0.346313	1.96138
GNA13	tr|A0A024R8M0|A0A024R8M0-HUMAN	0.575118	0.0284785	0.241009	0.903453	0.994094	0.293428	1.96
DLAT	sp|P10515|ODP2-HUMAN	0.895257	0.167258	0.0880041	1.72265	0.601066	0.456821	1.95976
PDCD11	sp|Q14690|RRP5-HUMAN	0.7913	0.102343	0.164261	1.39951	0.742918	0.404285	1.95728
ALYREF	tr|E9PB61|E9PB61-HUMAN	0.605701	0.0351728	0.23314	0.975404	0.982242	0.309632	1.9562
GTF3C5	sp|Q9Y5Q8-3|TF3C5-HUMAN	0.49777	0.0161092	0.247586	0.7477	0.999962	0.254981	1.95218
WDTC1	sp|Q8N5D0|WDTC1-HUMAN	0.696514	0.0619116	0.223103	1.18573	0.88871	0.357237	1.94973
GEN1	sp|Q17RS7|GEN-HUMAN	0.607143	0.035849	0.223715	0.987714	0.981002	0.311851	1.9469
	tr|A8KA19|A8KA19-HUMAN	0.60062	0.0344813	0.226127	0.969683	0.984253	0.309166	1.94271
BBS7	sp|Q8IWZ6|BBS7-HUMAN	0.676882	0.0558294	0.195571	1.14477	0.914267	0.349075	1.93907
	tr|A8K800|A8K800-HUMAN	0.637946	0.0440728	0.198955	1.04856	0.9577	0.32908	1.93857
CNTROB	sp|Q8N137-2|CNTRB-HUMAN	0.631055	0.0422547	0.220244	1.04557	0.96366	0.325739	1.9373
PPP2R1B	sp|P30154-2|2AAB-HUMAN	0.763138	0.0904743	0.162503	1.35154	0.784496	0.394148	1.93617
HEL-S-276	tr|A0A0K0K1K4|A0A0K0K1K4-HUMAN	0.636692	0.0438987	0.219181	1.05348	0.958541	0.329076	1.93479
KIF1BP	tr|A0A1B0GUA3|A0A1B0GUA3-HUMAN	0.72954	0.0759677	0.168147	1.28294	0.83677	0.377803	1.93101
NUP160	sp|Q12769|NU160-HUMAN	0.50076	0.016894	0.246771	0.75262	0.999939	0.259559	1.92927
XRCC6	sp|P12956|XRCC6-HUMAN	0.634141	0.0435247	0.218651	1.04678	0.960256	0.32899	1.92754
PPP6R1	sp|Q9UPN7|PP6R1-HUMAN	0.664131	0.0524941	0.198981	1.12625	0.928667	0.344986	1.9251
AARS2	sp|Q5JTZ9|SYAM-HUMAN	0.480339	0.0144178	0.246043	0.718699	0.999992	0.249978	1.92153
FLOT1	tr|Q5ST80|Q5ST80-HUMAN	0.45921	0.0121073	0.243576	0.675035	1	0.239614	1.91646
BMS1	sp|Q14692|BMS1-HUMAN	0.759338	0.0908725	0.167182	1.34951	0.787665	0.396991	1.91273
DKFZp686L20222	tr|Q5H9N4|Q5H9N4-HUMAN	0.71218	0.0705099	0.182982	1.23647	0.860799	0.372851	1.91009
C5orf30	sp|Q96GV9|CE030-HUMAN	0.744332	0.0842713	0.1575	1.30599	0.810765	0.390008	1.90851
RPS18	sp|P62269|RS18-HUMAN	0.544407	0.0242032	0.237731	0.853197	0.998297	0.285767	1.90507
LGALS8	tr|A0A024R3X1|A0A024R3X1-HUMAN	0.667962	0.0550097	0.221547	1.12443	0.921567	0.35113	1.90232
GOPC	sp|Q9HD26|GOPC-HUMAN	0.567729	0.0287953	0.23292	0.902898	0.994573	0.298896	1.89942
HNRNPM	sp|P52272|HNRPM-HUMAN	0.473776	0.0139654	0.231528	0.706632	0.999996	0.249433	1.89941
SPOC1	tr|A0A158RFV6|A0A158RFV6-HUMAN	0.688242	0.0622922	0.200733	1.20364	0.894188	0.36264	1.89787
PSMB5	sp|P28074|PSB5-HUMAN	0.650744	0.0502156	0.215153	1.09943	0.94045	0.344357	1.88974
GTF3C3	sp|Q9Y5Q9|TF3C3-HUMAN	0.819029	0.126453	0.11569	1.51023	0.694594	0.434175	1.8864
FTO	tr|A0A1B0GVH5|A0A1B0GVH5-HUMAN	0.818157	0.125937	0.123781	1.5218	0.695819	0.433751	1.88624
HERC2	sp|O95714|HERC2-HUMAN	0.419915	0.00874867	0.239255	0.604182	1	0.222746	1.88518
PITX1	tr|X5D9A5|X5D9A5-HUMAN	0.659511	0.0532385	0.203243	1.11783	0.929984	0.349857	1.88509
C8orf59	sp|Q8N0T1|CH059-HUMAN	0.649497	0.050085	0.219365	1.09846	0.941345	0.344569	1.88495
AP3M1	tr|A0A024QZR5|A0A024QZR5-HUMAN	0.696201	0.0664922	0.198182	1.19886	0.880632	0.370383	1.87968
PDS5B	sp|Q9NTI5|PDS5B-HUMAN	0.480331	0.015176	0.234771	0.724724	0.999988	0.256471	1.87285
NDUFS2	sp|O75306|NDUS2-HUMAN	0.65062	0.0512309	0.195029	1.11811	0.938656	0.347887	1.8702
GTF2H3	sp|Q13889|TF2H3-HUMAN	0.697083	0.0676243	0.193159	1.22072	0.877961	0.37305	1.86861
BBS4	sp|Q96RK4-2|BBS4-HUMAN	0.707881	0.0720514	0.170283	1.24162	0.861763	0.379194	1.86681
PELP1	tr|C9JFV4|C9JFV4-HUMAN	1.0792	0.391138	-0.165649	2.26392	0.449171	0.579513	1.86225
UBA52	tr|M0R2S1|M0R2S1-HUMAN	1.06085	0.366557	-0.182089	2.25157	0.459639	0.570712	1.85882
MSL3P1	sp|P0C860|MS3L2-HUMAN	0.78616	0.110704	0.18905	1.3865	0.73979	0.423224	1.85755
RDH10	sp|Q8IZV5|RDH10-HUMAN	0.866698	0.164262	0.0464487	1.66015	0.628884	0.467628	1.85339
STK11IP	sp|Q8N1F8|S11IP-HUMAN	0.674467	0.0603019	0.166102	1.18501	0.907522	0.364087	1.85249
UTY	tr|F4MH30|F4MH30-HUMAN	0.684842	0.0641745	0.158013	1.1915	0.893264	0.369906	1.8514
FN3KRP	sp|Q9HA64|KT3K-HUMAN	0.659515	0.0552129	0.194331	1.11482	0.926336	0.356283	1.8511
ITPR1	sp|Q14643|ITPR1-HUMAN	0.764162	0.0996462	0.126418	1.36142	0.772501	0.41309	1.84987
MCRS1	sp|Q96EZ8-2|MCRS1-HUMAN	0.323038	0.00318271	0.211686	0.434569	1	0.17464	1.84973
HNRPF	tr|A0A024R7T3|A0A024R7T3-HUMAN	0.45508	0.0125495	0.236257	0.676213	0.999999	0.246165	1.84868
GAS8	sp|O95995|GAS8-HUMAN	0.540164	0.0249517	0.225113	0.856591	0.998199	0.292432	1.84715
STARD8	sp|Q92502-2|STAR8-HUMAN	0.747132	0.0918712	0.149545	1.31071	0.797934	0.405688	1.84164
COA7	sp|Q96BR5|COA7-HUMAN	0.63002	0.0464989	0.182177	1.06968	0.956897	0.342269	1.84072
ZMAT5	tr|A0A024R1I1|A0A024R1I1-HUMAN	0.622315	0.0444058	0.197114	1.05243	0.963457	0.338618	1.83781
CASP8AP2	sp|Q9UKL3|C8AP2-HUMAN	0.492915	0.0175443	0.227275	0.756097	0.999935	0.268718	1.83432
PCYT1A	tr|C9JEJ2|C9JEJ2-HUMAN	0.863326	0.165394	0.0541693	1.66847	0.631588	0.47107	1.83269
	tr|H7C0C1|H7C0C1-HUMAN	0.653475	0.0547573	0.227856	1.07579	0.930678	0.35809	1.82489
OGDH	tr|E9PCR7|E9PCR7-HUMAN	0.75321	0.0968768	0.153283	1.38355	0.786082	0.413232	1.82273
HLTF	sp|Q14527|HLTF-HUMAN	0.59361	0.0374005	0.220725	0.974075	0.982196	0.32579	1.82206
SMN1	tr|E7EQZ4|E7EQZ4-HUMAN	0.712895	0.0780514	0.156465	1.27179	0.847946	0.391891	1.81912
EIF4A1	sp|P60842|IF4A1-HUMAN	0.744729	0.0932473	0.132638	1.35469	0.79841	0.410034	1.81626
UBE4B	sp|O95155-4|UBE4B-HUMAN	0.906715	0.205446	-0.00595449	1.79735	0.581517	0.499894	1.81381
GNL3	sp|Q9BVP2|GNL3-HUMAN	0.504619	0.0197697	0.226162	0.774044	0.999787	0.278635	1.81104
CBX4	tr|A0A0S2Z5B2|A0A0S2Z5B2-HUMAN	0.722456	0.0831864	0.158031	1.29566	0.832048	0.399222	1.80966
	tr|A0A140VJT2|A0A140VJT2-HUMAN	0.655473	0.0563713	0.196087	1.13064	0.926623	0.362221	1.80959
NUCKS1	sp|Q9H1E3|NUCKS-HUMAN	0.556016	0.0293058	0.212918	0.892763	0.99525	0.307886	1.80592
ZCCHC17	tr|A0A087WXF8|A0A087WXF8-HUMAN	0.652611	0.0563565	0.182411	1.12499	0.928312	0.363762	1.79406
CCDC15	tr|E9PKB1|E9PKB1-HUMAN	0.832648	0.149855	0.0715385	1.60618	0.667241	0.464916	1.79097
STON2	sp|Q8WXE9-3|STON2-HUMAN	0.458903	0.0138277	0.230373	0.696198	0.999998	0.256244	1.79088
ID1	sp|P41134|ID1-HUMAN	0.683246	0.0679651	0.147915	1.19335	0.887818	0.381563	1.79065
MADD	sp|Q8WXG6-2|MADD-HUMAN	0.484451	0.0171948	0.219173	0.741809	0.999958	0.270675	1.78979
MAGEA12	tr|Q6FHH8|Q6FHH8-HUMAN	0.784763	0.118626	0.0969374	1.51066	0.733989	0.438886	1.78808
	tr|Q53ET7|Q53ET7-HUMAN	0.675225	0.0650842	0.175627	1.19043	0.8985	0.377824	1.78714
RPRD1A	sp|Q96P16|RPR1A-HUMAN	0.669766	0.0630168	0.157506	1.17784	0.90583	0.374805	1.78697
EARS2	sp|Q5JPH6-2|SYEM-HUMAN	0.66942	0.0629124	0.194448	1.16771	0.906245	0.374688	1.78661
AKR1A1	sp|P14550|AK1A1-HUMAN	0.966732	0.273811	-0.0707977	1.97589	0.525261	0.541277	1.78602
MED24	tr|A0A0B4J1W0|A0A0B4J1W0-HUMAN	0.634811	0.0509738	0.182784	1.07798	0.947115	0.355655	1.78491
OBSL1	sp|O75147|OBSL1-HUMAN	0.573449	0.0339798	0.22082	0.936543	0.989666	0.321452	1.78394
METTL5	sp|Q9NRN9|METL5-HUMAN	0.892621	0.200111	0.00170409	1.75664	0.594839	0.501151	1.78114
	tr|B4DTZ1|B4DTZ1-HUMAN	0.335523	0.00399729	0.213188	0.458732	1	0.188435	1.78058
PHF21A	sp|Q96BD5-3|PF21A-HUMAN	0.76359	0.108	0.0918855	1.40378	0.764044	0.43038	1.77422
GOLPH3L	sp|Q9H4A5|GLP3L-HUMAN	0.521877	0.0235713	0.213567	0.827077	0.999078	0.294187	1.77396
PRPF38A	sp|Q8NAV1|PR38A-HUMAN	0.8697	0.181831	0.0218009	1.66383	0.620028	0.490303	1.7738
GMDS	sp|O60547|GMDS-HUMAN	0.627514	0.049282	0.17335	1.06063	0.953317	0.35377	1.77379
RPS4X	tr|B2R491|B2R491-HUMAN	0.52068	0.0234763	0.221692	0.819749	0.999121	0.294269	1.7694
	tr|B2R7I9|B2R7I9-HUMAN	0.663094	0.0619719	0.162437	1.13337	0.912029	0.375424	1.76625
FAM83A	sp|Q86UY5|FA83A-HUMAN	0.953077	0.265753	-0.0624604	2.01698	0.536187	0.540893	1.76204
TARDBP	sp|Q13148|TADBP-HUMAN	0.661925	0.0618478	0.16945	1.15616	0.912992	0.375711	1.7618
CPEB1	tr|A0A024R214|A0A024R214-HUMAN	0.750371	0.102432	0.0983579	1.39544	0.782295	0.426522	1.75928
KIF22	sp|Q14807|KIF22-HUMAN	0.3872	0.00727694	0.217456	0.55663	1	0.220312	1.7575
RBM39	sp|Q14498|RBM39-HUMAN	0.541285	0.0278535	0.207702	0.866459	0.997007	0.308329	1.75555
FBXO11	sp|Q86XK2-5|FBX11-HUMAN	0.527678	0.0251616	0.213646	0.840736	0.998548	0.300608	1.75537
HSPC152	tr|A0A024R565|A0A024R565-HUMAN	0.642374	0.0552658	0.185113	1.1156	0.935902	0.365966	1.75529
POLR1A	sp|O95602|RPA1-HUMAN	0.625433	0.049831	0.190866	1.06744	0.953322	0.356918	1.75231
WDR6	tr|A0A087X295|A0A087X295-HUMAN	0.439864	0.0122153	0.225793	0.661013	1	0.251266	1.75059
RBM45	sp|Q8IUH3|RBM45-HUMAN	0.604074	0.0436155	0.190677	1.01947	0.971007	0.345725	1.74727
WDR12	sp|Q9GZL7|WDR12-HUMAN	0.498094	0.0202364	0.210697	0.790049	0.999791	0.285598	1.74404
EZH2	sp|Q15910-2|EZH2-HUMAN	0.893515	0.209715	0.00350078	1.8201	0.591918	0.512522	1.74337
PRPSAP1	sp|Q14558-2|KPRA-HUMAN	0.509389	0.0222061	0.216144	0.804581	0.999503	0.292541	1.74126
SUPT3H	sp|O75486|SUPT3-HUMAN	1.24202	0.789886	-0.484912	3.09683	0.386867	0.715572	1.7357
DDX41	tr|J3KNN5|J3KNN5-HUMAN	0.425783	0.0109375	0.218528	0.63528	1	0.245624	1.73348
	tr|B7Z8T0|B7Z8T0-HUMAN	0.573305	0.036177	0.200585	0.964928	0.987564	0.331765	1.72805
TROAP	tr|F8W130|F8W130-HUMAN	0.53011	0.026517	0.221631	0.85652	0.998047	0.307182	1.72572
POLR3D	sp|P05423|RPC4-HUMAN	1.24013	0.801162	-0.497412	3.023	0.38808	0.72176	1.7182
WDR48	sp|Q8TAF3|WDR48-HUMAN	0.660946	0.0646494	0.159991	1.16015	0.908813	0.384695	1.71811
C13orf1	tr|A0A024RDT6|A0A024RDT6-HUMAN	0.802672	0.140913	0.0703643	1.57086	0.70044	0.467668	1.71633
TSFM	sp|P43897|EFTS-HUMAN	0.639727	0.0570068	0.157293	1.12382	0.934341	0.373223	1.71406
ASH1L	sp|Q9NR48|ASH1L-HUMAN	1.09155	0.483356	-0.274281	2.49625	0.446305	0.636927	1.71377
PARP14	sp|Q460N5|PAR14-HUMAN	0.523371	0.0255477	0.203745	0.839892	0.998568	0.305398	1.71373
ADH5	tr|Q6IRT1|Q6IRT1-HUMAN	0.876767	0.201782	-0.000679667	1.75922	0.608073	0.512339	1.7113
	tr|B2R5C5|B2R5C5-HUMAN	0.702207	0.0833081	0.108747	1.28235	0.848903	0.411035	1.70839
ALKBH5	sp|Q6P6C2|ALKB5-HUMAN	0.735396	0.100334	0.12291	1.3612	0.798242	0.430728	1.70733
BCAT1	sp|P54687-5|BCAT1-HUMAN	0.711481	0.0879127	0.112115	1.30117	0.834743	0.416737	1.70726
ENO2	sp|P09104|ENOG-HUMAN	0.724706	0.0948367	0.0972136	1.34277	0.814323	0.424939	1.70544
SYDE2	sp|Q5VT97|SYDE2-HUMAN	0.861447	0.189695	-0.0206817	1.72609	0.624793	0.505591	1.70384
HEL-S-166mP	tr|V9HWA2|V9HWA2-HUMAN	0.5964	0.0435911	0.174626	1.03817	0.973387	0.350075	1.70363
SENP3	sp|Q9H4L4|SENP3-HUMAN	0.633863	0.05562	0.143646	1.08456	0.939727	0.372066	1.70363
MRPL1	sp|Q9BYD6|RM01-HUMAN	0.466921	0.016482	0.212325	0.720138	0.999984	0.274955	1.69817
CHP1	sp|Q99653|CHP1-HUMAN	0.638838	0.0578987	0.172548	1.1131	0.933316	0.376655	1.69608
INTS7	sp|Q9NVH2|INT7-HUMAN	0.829534	0.164662	0.0237386	1.62688	0.662786	0.489173	1.69579
CD59	tr|E9PR17|E9PR17-HUMAN	0.670536	0.070378	0.1156	1.19648	0.892865	0.395637	1.69483
TMA16	tr|H0Y9X1|H0Y9X1-HUMAN	0.469232	0.0168777	0.208633	0.718242	0.999978	0.276866	1.6948
CHTF8	tr|L0R4W3|L0R4W3-HUMAN	0.88871	0.217284	-0.0547314	1.85954	0.594325	0.52451	1.69436
	tr|B3KWY9|B3KWY9-HUMAN	0.580732	0.0396591	0.183953	0.990353	0.982369	0.342922	1.69348
SHPRH	tr|A0A0D9SFM0|A0A0D9SFM0-HUMAN	0.945433	0.27932	-0.0855535	1.97484	0.541001	0.559011	1.69126
PUS1	sp|Q9Y606|TRUA-HUMAN	0.595647	0.0441085	0.167184	1.0105	0.972904	0.352592	1.68934
	tr|B2R6K4|B2R6K4-HUMAN	0.712027	0.0900782	0.121786	1.29642	0.831345	0.421515	1.68921
TSC2	sp|P49815|TSC2-HUMAN	0.652984	0.0640653	0.175301	1.16485	0.914813	0.387622	1.68459
HTATIP2	sp|Q9BUP3-3|HTAI2-HUMAN	0.696481	0.0830618	0.114646	1.27016	0.853861	0.413801	1.68313
QKI	sp|Q96PU8|QKI-HUMAN	0.572125	0.0378745	0.194555	0.960226	0.986046	0.340159	1.68193
FGF2	sp|P09038|FGF2-HUMAN	0.599133	0.045587	0.156834	1.02901	0.969775	0.356367	1.68123
SOD2	sp|P04179|SODM-HUMAN	1.44357	1.53657	-1.0191	3.98844	0.335887	0.858694	1.68112
NOP58	sp|Q9Y2X3|NOP58-HUMAN	0.486408	0.0198742	0.212487	0.760093	0.999865	0.289831	1.67825
ORC4	sp|O43929|ORC4-HUMAN	0.608005	0.0486102	0.162112	1.0493	0.962293	0.362624	1.67668
SDHA	tr|A0A024QZ30|A0A024QZ30-HUMAN	0.827919	0.167636	0.00121368	1.64069	0.662859	0.494534	1.67414
USP3	sp|Q9Y6I4|UBP3-HUMAN	0.667696	0.0709187	0.116961	1.19308	0.893953	0.398843	1.67408
FAM83G	sp|A6ND36|FA83G-HUMAN	0.629144	0.0560886	0.137623	1.10731	0.941316	0.376433	1.67133
C2CD3	sp|Q4AC94|C2CD3-HUMAN	0.654699	0.0658382	0.166933	1.16307	0.910806	0.39192	1.67049
NDUFAF4	sp|Q9P032|NDUF4-HUMAN	0.809503	0.153967	0.0225786	1.60421	0.686331	0.484725	1.67003
HPCA	sp|P84074|HPCA-HUMAN	0.614201	0.0510596	0.174214	1.08889	0.956121	0.367899	1.66948
MRPL22	tr|J3KQY1|J3KQY1-HUMAN	0.96404	0.309901	0.318563	1.64092	0.525543	0.577453	1.66947
FAM208B	sp|Q5VWN6|F208B-HUMAN	0.372303	0.00689753	0.206685	0.533934	1	0.223075	1.66896
CHTF18	sp|Q8WVB6-2|CTF18-HUMAN	0.612814	0.0506351	0.168786	1.0629	0.957343	0.367195	1.6689
GRAMD1A	tr|M0QZ12|M0QZ12-HUMAN	0.687675	0.0804548	0.115442	1.25342	0.864576	0.41247	1.66721
BCR	sp|P11274|BCR-HUMAN	0.475005	0.0183183	0.205409	0.743143	0.999948	0.284934	1.66707
SNAPC4	sp|Q5SXM2|SNPC4-HUMAN	0.631544	0.057342	0.170912	1.11168	0.938059	0.379169	1.6656
DDX24	sp|Q9GZR7|DDX24-HUMAN	0.468996	0.0174494	0.212406	0.722356	0.999971	0.281657	1.66513
GADD45B	sp|O75293|GA45B-HUMAN	1.3204	1.09633	-0.747444	3.41638	0.36646	0.792985	1.6651
PPAN-P2RY11	tr|A0A0B4J1V8|A0A0B4J1V8-HUMAN	0.489339	0.0207264	0.210554	0.777819	0.999805	0.294206	1.66325
NCLN	sp|Q969V3|NCLN-HUMAN	0.985809	0.341499	-0.14715	2.16845	0.509348	0.592791	1.66299
NDUFA5	sp|Q16718|NDUA5-HUMAN	0.481258	0.0194189	0.197575	0.751475	0.999901	0.289557	1.66205
IARS2	sp|Q9NSE4|SYIM-HUMAN	0.601941	0.0475412	0.144683	1.03643	0.966047	0.362227	1.66178
KIAA0415	tr|A4D1Z4|A4D1Z4-HUMAN	0.656067	0.0671642	0.147741	1.17567	0.907763	0.395021	1.66084
TUBB2C	tr|Q8IZ29|Q8IZ29-HUMAN	0.527626	0.0281853	0.185996	0.850785	0.997551	0.318189	1.65822
ZZZ3	sp|Q8IYH5|ZZZ3-HUMAN	0.564325	0.0368871	0.181555	0.938092	0.988348	0.340336	1.65814
TERF2IP	sp|Q9NYB0|TE2IP-HUMAN	0.635458	0.0593199	0.132077	1.11985	0.93277	0.383278	1.65796
PPRC1	sp|Q5VV67|PPRC1-HUMAN	0.612732	0.0513024	0.172645	1.05318	0.956348	0.369656	1.65757
	tr|H9A532|H9A532-HUMAN	0.619007	0.0537491	0.154788	1.08432	0.949845	0.374533	1.65274
USP33	sp|Q8TEY7|UBP33-HUMAN	0.660632	0.0697921	0.0832202	1.17623	0.900534	0.399893	1.65202
PSMC5	sp|P62195|PRS8-HUMAN	0.650756	0.0658016	0.14412	1.14175	0.913319	0.394185	1.65089
DUSP1	sp|P28562|DUS1-HUMAN	1.13642	0.613234	-0.403728	2.6637	0.427667	0.689087	1.64917
EIF2D	sp|P41214|EIF2D-HUMAN	0.68123	0.0795268	0.115279	1.22539	0.87084	0.413964	1.64562
NUDC	sp|Q9Y266|NUDC-HUMAN	0.37651	0.00743016	0.211656	0.545671	1	0.22894	1.64458
RAB10	sp|P61026|RAB10-HUMAN	0.643855	0.0635577	0.117018	1.15016	0.921125	0.391558	1.64434
	tr|Q59GY0|Q59GY0-HUMAN	0.601272	0.048676	0.172924	1.05551	0.964639	0.366933	1.63864
ETFA	tr|A0A0S2Z3L0|A0A0S2Z3L0-HUMAN	0.682774	0.0812926	0.120015	1.23598	0.867062	0.417589	1.63504
AK2	sp|P54819|KAD2-HUMAN	0.754875	0.121764	0.0651069	1.44864	0.758807	0.462258	1.63302
KCTD20	sp|Q7Z5Y7|KCD20-HUMAN	0.696996	0.0885188	0.1071	1.27735	0.845763	0.426862	1.63284
ZNF200	sp|P98182|ZN200-HUMAN	0.701809	0.091023	0.0922413	1.33526	0.838514	0.429889	1.63253
POLDIP2	sp|Q9Y2S7|PDIP2-HUMAN	0.667063	0.0749864	0.0947197	1.21263	0.887974	0.410511	1.62496
USP20	tr|A0A024R8A9|A0A024R8A9-HUMAN	0.537357	0.0316597	0.192487	0.892553	0.99534	0.331124	1.62283
SSX2	sp|Q16385-2|SSX2-HUMAN	0.729762	0.107756	0.0733689	1.34859	0.794814	0.449821	1.62234
ZKSCAN1	sp|P17029|ZKSC1-HUMAN	0.808421	0.162319	0.0152765	1.61233	0.682786	0.498364	1.62215
	tr|A8K5Y7|A8K5Y7-HUMAN	0.497164	0.0232389	0.193027	0.80171	0.999514	0.306625	1.62141
	tr|Q59GF1|Q59GF1-HUMAN	0.632706	0.0615975	0.123469	1.13053	0.93055	0.392265	1.61296
	tr|B3KY51|B3KY51-HUMAN	0.655412	0.0710794	0.14427	1.19355	0.901907	0.406778	1.61123
HNRNPA0	sp|Q13151|ROA0-HUMAN	0.693698	0.0896004	0.0939925	1.27629	0.846912	0.431504	1.60763
SETD3	tr|A0A024R6K3|A0A024R6K3-HUMAN	0.646215	0.0675832	0.18429	1.1	0.913224	0.402293	1.60633
C6orf130	tr|A0A024RCY9|A0A024RCY9-HUMAN	0.637577	0.0643876	0.136478	1.13913	0.923395	0.397987	1.60201
ADSL	tr|A0A0A6YY92|A0A0A6YY92-HUMAN	0.495186	0.023439	0.191504	0.802051	0.999512	0.309173	1.60165
SUPV3L1	sp|Q8IYB8|SUV3-HUMAN	0.692771	0.0899033	0.0719592	1.29398	0.847235	0.432811	1.60063
OPA1	sp|O60313-2|OPA1-HUMAN	0.48615	0.0218744	0.198786	0.780938	0.999744	0.304227	1.59798
RARS2	sp|Q5T160|SYRM-HUMAN	0.615415	0.0563942	0.155295	1.07707	0.947328	0.385877	1.59485
	tr|Q6ZNF7|Q6ZNF7-HUMAN	0.665806	0.0773103	0.131084	1.19845	0.885305	0.41761	1.59432
	tr|B2RAH7|B2RAH7-HUMAN	0.617713	0.0575075	0.137543	1.08422	0.944548	0.388218	1.59115
ECI1	sp|P42126|ECI1-HUMAN	0.698791	0.0944401	0.0756612	1.31665	0.836492	0.439775	1.58897
AKAP8	tr|Q8NE02|Q8NE02-HUMAN	0.474826	0.0201344	0.203148	0.755779	0.999893	0.298837	1.58891
PHB2	sp|Q99623|PHB2-HUMAN	0.583078	0.0459397	0.154395	1.01635	0.974124	0.367593	1.5862
	tr|B2R6K0|B2R6K0-HUMAN	0.592738	0.0490933	0.151915	1.00066	0.966974	0.373808	1.58568
MBD4	sp|O95243-2|MBD4-HUMAN	0.735789	0.116623	0.0505367	1.40508	0.780438	0.464129	1.58531
NOSTRIN	sp|Q8IVI9-4|NOSTN-HUMAN	0.538138	0.0333898	0.174054	0.893172	0.994257	0.339557	1.58482
POLR3A	sp|O14802|RPC1-HUMAN	0.477281	0.0207419	0.192235	0.76698	0.999858	0.301752	1.5817
LARS2	sp|Q15031|SYLM-HUMAN	0.687417	0.0895974	0.101151	1.2904	0.851822	0.435439	1.57868
PROSER1	sp|Q86XN7|PRSR1-HUMAN	0.40025	0.0103102	0.201738	0.610768	1	0.253689	1.57772
NSMCE2	sp|Q96MF7|NSE2-HUMAN	0.544247	0.0353184	0.180749	0.919652	0.992348	0.345306	1.57613
	tr|B4DY32|B4DY32-HUMAN	0.656614	0.0748901	0.155294	1.17683	0.895222	0.416775	1.57546
	tr|B3KPB2|B3KPB2-HUMAN	0.592016	0.0496306	0.137353	1.02065	0.966475	0.376306	1.57323
RCOR1	sp|Q9UKL0|RCOR1-HUMAN	0.621733	0.0606821	0.130424	1.09329	0.937677	0.396211	1.5692
USP19	tr|A5PL36|A5PL36-HUMAN	0.683232	0.088736	0.0926325	1.25954	0.856197	0.435995	1.56706
KIAA0586	sp|Q9BVV6-3|TALD3-HUMAN	0.585847	0.0480119	0.157158	1.01753	0.970628	0.374016	1.56637
PEX1	sp|O43933|PEX1-HUMAN	0.336581	0.00523638	0.193957	0.481456	1	0.214994	1.56554
CDC25A	sp|P30304|MPIP1-HUMAN	0.911785	0.282066	-0.156672	1.99766	0.565801	0.582483	1.56534
GRWD1	sp|Q9BQ67|GRWD1-HUMAN	0.635353	0.0665392	0.155397	1.1393	0.921264	0.405998	1.56492
GSTK1	sp|Q9Y2Q3|GSTK1-HUMAN	0.663266	0.0790352	0.131056	1.22895	0.884498	0.42386	1.56482
JAK1	sp|P23458|JAK1-HUMAN	0.727193	0.114467	0.0453333	1.4058	0.789975	0.465254	1.563
TUBB2A	sp|Q13885|TBB2A-HUMAN	0.390693	0.0095704	0.196021	0.584998	1	0.250397	1.56029
TCAF1	sp|Q9Y4C2|TCAF1-HUMAN	0.756348	0.134617	0.0301349	1.50579	0.746679	0.485097	1.55917
ICE1	sp|Q9Y2F5|ICE1-HUMAN	0.536726	0.0341545	0.182707	0.905868	0.993908	0.344327	1.55877
TUBE1	sp|Q9UJT0|TBE-HUMAN	0.677112	0.0865385	0.113708	1.28631	0.863812	0.434454	1.55853
NAB2	sp|Q15742|NAB2-HUMAN	0.615778	0.0592199	0.127145	1.1052	0.942818	0.395193	1.55817
THAP12	sp|O43422|P52K-HUMAN	0.912127	0.285341	-0.157382	1.95456	0.56516	0.585635	1.5575
NOTCH1	sp|P46531|NOTC1-HUMAN	0.646723	0.0721972	0.113458	1.19324	0.905709	0.415472	1.5566
TMEM131	sp|Q92545|TM131-HUMAN	0.544595	0.0365698	0.158235	0.923051	0.991377	0.351146	1.55091
XRCC5	sp|P13010|XRCC5-HUMAN	0.456131	0.0181112	0.192803	0.726702	0.999973	0.295042	1.54599
PHIP	sp|Q8WWQ0|PHIP-HUMAN	0.624614	0.0637381	0.149616	1.09795	0.931478	0.404192	1.54534
UQCRFS1	sp|P47985|UCRI-HUMAN	0.962165	0.360067	-0.222561	2.14523	0.5246	0.623652	1.54279
	tr|A8K4Z4|A8K4Z4-HUMAN	0.514727	0.0295617	0.176204	0.855217	0.997617	0.334032	1.54095
GLS	sp|O94925|GLSK-HUMAN	0.659243	0.0797728	0.118075	1.2033	0.886182	0.428432	1.53873
CLPTM1L	sp|Q96KA5|CLP1L-HUMAN	0.594285	0.0528881	0.140939	1.06921	0.961149	0.386976	1.53571
ZWILCH	sp|Q9H900|ZWILC-HUMAN	0.733866	0.123108	0.0486077	1.4201	0.775925	0.478108	1.53494
ASF1A	sp|Q9Y294|ASF1A-HUMAN	0.559227	0.041709	0.162923	0.96377	0.984545	0.365197	1.5313
HEL-S-10	tr|V9HWI1|V9HWI1-HUMAN	0.812631	0.18629	-0.0221111	1.66824	0.667884	0.531131	1.53
PTGES3	tr|B3KUY2|B3KUY2-HUMAN	0.592046	0.0525681	0.135706	1.04737	0.962405	0.387263	1.5288
COG4	tr|J3KNI1|J3KNI1-HUMAN	0.615649	0.0615626	0.118665	1.11065	0.939317	0.403019	1.52759
	tr|Q59EK0|Q59EK0-HUMAN	0.668923	0.0858023	0.0702661	1.25863	0.870817	0.437898	1.52758
AMFR	sp|Q9UKV5|AMFR-HUMAN	0.547778	0.0386113	0.136488	0.953834	0.989316	0.358718	1.52705
HELLS	tr|A0A0B4J1V9|A0A0B4J1V9-HUMAN	0.685371	0.0947576	0.0735035	1.2894	0.846632	0.44914	1.52596
	tr|A8KA74|A8KA74-HUMAN	0.57474	0.0469533	0.145989	0.992472	0.975151	0.377018	1.52444
	tr|Q53HH3|Q53HH3-HUMAN	0.598484	0.0555931	0.13288	1.07485	0.955708	0.393965	1.51913
KANK2	sp|Q63ZY3|KANK2-HUMAN	0.44122	0.0164308	0.185213	0.695066	0.999993	0.290519	1.51873
NOMO1	tr|A0A0G2JN29|A0A0G2JN29-HUMAN	0.612587	0.0611916	0.111465	1.10406	0.941341	0.403811	1.51701
	tr|B2RAR2|B2RAR2-HUMAN	0.477348	0.0226646	0.186496	0.774218	0.999741	0.315383	1.51355
SNRPF	sp|P62306|RUXF-HUMAN	1.24017	1.03436	-0.80087	3.21494	0.392849	0.820077	1.51226
TNKS2	sp|Q9H2K2|TNKS2-HUMAN	0.644503	0.0755389	0.116128	1.1541	0.902073	0.426442	1.51135
INPPL1	sp|O15357|SHIP2-HUMAN	0.442093	0.0167397	0.187634	0.698332	0.999992	0.292658	1.51061
SLCO4A1	sp|Q96BD0|SO4A1-HUMAN	0.569657	0.0461931	0.135679	1.00118	0.977373	0.37729	1.50987
CHD2	sp|O14647|CHD2-HUMAN	0.624679	0.066873	0.113992	1.13204	0.926661	0.41397	1.509
SEC24C	sp|P53992|SC24C-HUMAN	0.356189	0.00706973	0.190414	0.518062	1	0.236059	1.5089
KAT14	sp|Q9H8E8|CSR2B-HUMAN	0.455156	0.0189615	0.185507	0.730989	0.999962	0.302535	1.50447
	tr|B4DND3|B4DND3-HUMAN	0.628476	0.0689357	0.122944	1.14661	0.92147	0.417766	1.50437
SMC5	sp|Q8IY18|SMC5-HUMAN	0.685908	0.0978339	0.0516237	1.31207	0.842354	0.456015	1.50414
TRAF7	sp|Q6Q0C0|TRAF7-HUMAN	0.597334	0.0567494	0.124897	1.05762	0.954515	0.398808	1.4978
N-PAC	tr|D3DUE6|D3DUE6-HUMAN	0.624018	0.0677006	0.104304	1.13287	0.925772	0.416965	1.49657
ECT2	sp|Q9H8V3|ECT2-HUMAN	0.559839	0.0438904	0.151627	0.967664	0.98218	0.374215	1.49603
PSMD6	sp|Q15008|PSMD6-HUMAN	0.608801	0.0614585	0.113428	1.10975	0.942717	0.407207	1.49506
hfzo2	tr|Q4AEJ4|Q4AEJ4-HUMAN	0.656568	0.0837716	0.0563967	1.23286	0.882301	0.440828	1.4894
THADA	sp|Q6YHU6|THADA-HUMAN	0.732223	0.129736	0.0363735	1.44568	0.77139	0.491911	1.48853
GNAI2	sp|P04899-4|GNAI2-HUMAN	0.578103	0.0504412	0.126884	1.01783	0.969844	0.388497	1.48805
EPPK1	sp|P58107|EPIPL-HUMAN	0.580295	0.0514212	0.150763	1.02948	0.967905	0.390771	1.485
RILP	sp|Q96NA2|RILP-HUMAN	0.551753	0.0421901	0.139801	0.962122	0.985456	0.372272	1.48212
HMGA1	sp|P17096|HMGA1-HUMAN	1.37126	1.6147	-1.27582	3.81064	0.354065	0.926672	1.47977
PES1	tr|B2RDF2|B2RDF2-HUMAN	0.420846	0.0143458	0.188186	0.656862	0.999999	0.284603	1.47871
IFI35	sp|P80217-2|IN35-HUMAN	0.576113	0.0508537	0.121357	1.0189	0.969926	0.39143	1.47182
MZT2A	sp|Q6P582|MZT2A-HUMAN	0.674856	0.0961705	0.0884558	1.28536	0.852788	0.459526	1.46859
UCHL5	tr|Q5LJA9|Q5LJA9-HUMAN	0.480674	0.0247643	0.167627	0.788749	0.999517	0.327388	1.46821
NCAPD3	sp|P42695|CNDD3-HUMAN	0.878611	0.276733	-0.129792	1.92555	0.591069	0.598734	1.46745
HNRNPH1	tr|G8JLB6|G8JLB6-HUMAN	0.361948	0.00804264	0.185258	0.53632	1	0.247773	1.46081
RBBP8	sp|Q99708-2|CTIP-HUMAN	0.502259	0.0298713	0.151109	0.85162	0.998011	0.344112	1.45958
PCM1	tr|D3DSQ0|D3DSQ0-HUMAN	0.41533	0.0139967	0.184603	0.648842	1	0.284852	1.45805
LPIN1	sp|Q14693-7|LPIN1-HUMAN	0.637298	0.0776601	0.0760587	1.19469	0.90346	0.437277	1.45742
GDAP2	sp|Q9NXN4|GDAP2-HUMAN	0.62716	0.0728671	0.124877	1.14477	0.916391	0.430415	1.45711
RUFY2	sp|Q8WXA3|RUFY2-HUMAN	0.699748	0.112944	0.0179023	1.37699	0.814183	0.480275	1.45697
VPS11	sp|Q9H270|VPS11-HUMAN	0.689211	0.106706	0.0240619	1.33859	0.829304	0.473961	1.45415
ICE2	sp|Q659A1|ICE2-HUMAN	0.443075	0.0183248	0.180079	0.710311	0.999981	0.305522	1.45022
DNAJB12	tr|J3KPS0|J3KPS0-HUMAN	0.586591	0.0563227	0.106704	1.05248	0.959242	0.404582	1.44987
DBF4	sp|Q9UBU7|DBF4A-HUMAN	0.621211	0.0710452	0.076898	1.15614	0.922359	0.42907	1.44781
KDM1B	sp|Q8NB78|KDM1B-HUMAN	0.514887	0.0335774	0.154873	0.876316	0.995944	0.355887	1.44677
ATP6V1E1	tr|Q53Y06|Q53Y06-HUMAN	0.549711	0.0436676	0.136459	0.959154	0.984412	0.380141	1.44607
	tr|Q59EM7|Q59EM7-HUMAN	0.648153	0.0851572	0.0668267	1.21972	0.886035	0.450229	1.43961
AHI1	sp|Q8N157|AHI1-HUMAN	0.618034	0.0704744	0.0754713	1.13735	0.9249	0.42954	1.43883
RAB6A	sp|P20340|RAB6A-HUMAN	0.586942	0.0576812	0.0701194	1.05333	0.957271	0.409187	1.43441
C18orf55	tr|A8K1K8|A8K1K8-HUMAN	0.570442	0.0515097	0.100341	1.02855	0.9708	0.397863	1.43377
TNPO1	tr|A0A024RAM0|A0A024RAM0-HUMAN	0.453071	0.0205001	0.176664	0.731698	0.999933	0.316018	1.43369
PKP3	sp|Q9Y446-2|PKP3-HUMAN	0.330408	0.00580319	0.179976	0.482129	1	0.230559	1.43307
FAM210A	sp|Q96ND0|F210A-HUMAN	0.625297	0.0748158	0.0662635	1.14566	0.914642	0.437432	1.42947
MTCH2	sp|Q9Y6C9|MTCH2-HUMAN	0.637145	0.0808406	0.0484618	1.21327	0.899057	0.446248	1.42778
SENP5	sp|Q96HI0|SENP5-HUMAN	0.620795	0.0729742	0.0788263	1.14278	0.919803	0.435147	1.42663
MAPK3	sp|P27361|MK03-HUMAN	0.525621	0.0375591	0.138968	0.901934	0.992813	0.36871	1.42557
RPS27L	tr|H0YMV8|H0YMV8-HUMAN	0.576003	0.054241	0.0995071	1.02386	0.965661	0.404333	1.42458
CAMKK1	tr|J3KPJ3|J3KPJ3-HUMAN	0.611206	0.0689379	0.0966775	1.14704	0.930667	0.429577	1.42281
SPATA5L1	sp|Q9BVQ7|SPA5L-HUMAN	0.622986	0.074538	0.0775467	1.17239	0.916348	0.438239	1.42157
VRK3	tr|A0A024QZI4|A0A024QZI4-HUMAN	0.669115	0.0992832	0.00397745	1.30206	0.853169	0.470909	1.4209
SP2	sp|Q02086|SP2-HUMAN	0.551331	0.0459424	0.109492	0.97012	0.981836	0.388772	1.41814
AP3M2	sp|P53677|AP3M2-HUMAN	0.642759	0.084901	0.0422892	1.22611	0.889908	0.453324	1.41788
USP36	tr|A0A024R8V6|A0A024R8V6-HUMAN	0.456152	0.0216118	0.168947	0.753988	0.999892	0.322282	1.41538
MRPS31	sp|Q92665|RT31-HUMAN	0.602957	0.0661612	0.0858577	1.11389	0.938658	0.426595	1.41342
TAB3	sp|Q8N5C8|TAB3-HUMAN	0.556309	0.0480385	0.110607	1.0193	0.978533	0.393984	1.41201
PDRG1	sp|Q9NUG6|PDRG1-HUMAN	0.819502	0.226496	-0.115971	1.77444	0.647688	0.580738	1.41114
COX6B1	sp|P14854|CX6B1-HUMAN	0.756749	0.165046	-0.0821883	1.56837	0.725326	0.536847	1.40962
CAPN1	sp|P07384|CAN1-HUMAN	0.500644	0.0316215	0.139839	0.8524	0.997509	0.355191	1.40951
HIST2H2BC	sp|Q6DN03|H2B2C-HUMAN	0.595563	0.0636323	0.0885707	1.09378	0.945565	0.423556	1.4061
CEP192	sp|Q8TEP8-3|CE192-HUMAN	0.305864	0.00442797	0.175325	0.436902	1	0.217557	1.4059
PEAK1	sp|Q9H792|PEAK1-HUMAN	0.424423	0.0164531	0.17155	0.674733	0.999996	0.302221	1.40435
KIAA0922	sp|A2VDJ0-5|T131L-HUMAN	0.692044	0.116322	0.0264669	1.35675	0.81672	0.49283	1.40422
SETX	tr|A0A024R8E8|A0A024R8E8-HUMAN	0.573003	0.0548315	0.137996	1.03616	0.965887	0.408656	1.40216
HECTD4	tr|J3KPF0|J3KPF0-HUMAN	0.551244	0.0470547	0.127144	1.0062	0.980715	0.393512	1.40083
BAZ1A	sp|Q9NRL2|BAZ1A-HUMAN	0.528256	0.0396891	0.13853	0.921852	0.991056	0.37713	1.40073
ZNF326	sp|Q5BKZ1|ZN326-HUMAN	0.695548	0.119518	-0.00571872	1.38697	0.810745	0.497038	1.39939
ABCC5	sp|O15440|MRP5-HUMAN	0.594712	0.0639986	0.0784488	1.09064	0.945429	0.425381	1.39807
CSNK1G1	tr|U3KQB3|U3KQB3-HUMAN	0.623543	0.0773815	0.0609101	1.19614	0.912021	0.44612	1.3977
NEK2	sp|P51955|NEK2-HUMAN	0.555016	0.04881	0.115728	0.995272	0.978003	0.39806	1.3943
	tr|Q53ET4|Q53ET4-HUMAN	0.498462	0.0318257	0.136007	0.851162	0.997533	0.357896	1.39276
RECQL4	sp|O94761|RECQ4-HUMAN	0.610081	0.0714201	0.0916229	1.14896	0.927722	0.438049	1.39272
TPP1	tr|D3DQU2|D3DQU2-HUMAN	0.583823	0.0599664	0.0804184	1.07713	0.955389	0.419443	1.3919
TTLL5	tr|G3V2J9|G3V2J9-HUMAN	0.659788	0.0978735	-0.00681709	1.29864	0.861585	0.474164	1.39148
PHF6	tr|A0A0D9SGE8|A0A0D9SGE8-HUMAN	0.426819	0.0171633	0.169167	0.69365	0.999994	0.306942	1.39055
DECR2	sp|Q9NUI1|DECR2-HUMAN	0.578668	0.058249	0.0838671	1.07366	0.959572	0.417076	1.38744
RCE1	tr|Q0P5W4|Q0P5W4-HUMAN	0.581841	0.0595746	0.110485	1.11546	0.956663	0.419494	1.38701
NSA2	sp|O95478|NSA2-HUMAN	0.757084	0.170943	-0.00523239	1.56149	0.721566	0.546112	1.38632
MPP5	tr|Q4VBP4|Q4VBP4-HUMAN	0.633316	0.0838141	0.0623358	1.1982	0.897348	0.457128	1.38542
ARHG	tr|Q6ICQ8|Q6ICQ8-HUMAN	0.462112	0.0238716	0.160985	0.769585	0.999751	0.334344	1.38215
CRK	sp|P46108-2|CRK-HUMAN	0.562149	0.0522921	0.0952038	1.03273	0.972237	0.406787	1.38193
RBM15B	sp|Q8NDT2|RB15B-HUMAN	0.476582	0.0272165	0.146482	0.805337	0.999245	0.346161	1.37676
HADH	tr|A0A0A0MSE2|A0A0A0MSE2-HUMAN	1.69085	4.3313	-2.26335	5.68974	0.271948	1.23085	1.37373
RPS23	tr|A8K517|A8K517-HUMAN	0.355009	0.00842035	0.173383	0.53635	1	0.258479	1.37345
SMC4	sp|Q9NTJ3|SMC4-HUMAN	0.397475	0.0133054	0.171096	0.623915	1	0.290205	1.36964
GPN3	sp|Q9UHW5-2|GPN3-HUMAN	0.597446	0.0680467	0.100352	1.14882	0.938608	0.436621	1.36834
CCDC93	sp|Q567U6|CCD93-HUMAN	0.584005	0.0621922	0.055487	1.08627	0.952351	0.427023	1.36762
DDX47	sp|Q9H0S4|DDX47-HUMAN	0.58107	0.061388	0.102161	1.05839	0.954565	0.426396	1.36275
LGALS1	sp|P09382|LEG1-HUMAN	0.390017	0.0124855	0.169529	0.614214	1	0.286497	1.36133
SNX14	sp|Q9Y5W7|SNX14-HUMAN	0.833379	0.260545	-0.175276	1.83219	0.627786	0.61249	1.36064
C1orf33	tr|A0A024RAE1|A0A024RAE1-HUMAN	0.630177	0.0852121	0.0521116	1.21044	0.897405	0.463221	1.36042
ERCC1	tr|A0A024R0Q6|A0A024R0Q6-HUMAN	0.827281	0.253216	-0.182431	1.8372	0.634149	0.608265	1.36007
FLYWCH1	sp|Q4VC44|FWCH1-HUMAN	0.588023	0.0647926	0.0637574	1.08745	0.947222	0.432881	1.35839
	tr|A8KAI3|A8KAI3-HUMAN	0.615277	0.0777319	0.0631707	1.18168	0.916192	0.453136	1.35782
CUL3	tr|A0A024R475|A0A024R475-HUMAN	0.59621	0.0689798	0.0703981	1.11476	0.937906	0.440516	1.35344
EIF2B4	tr|E7ERK9|E7ERK9-HUMAN	0.743713	0.167119	-0.0771234	1.56513	0.734635	0.549677	1.353
RNF2	sp|Q99496|RING2-HUMAN	0.668714	0.109904	0.00975587	1.32832	0.841175	0.495754	1.34888
HDAC2	sp|Q92769|HDAC2-HUMAN	0.377607	0.0111777	0.169829	0.585695	1	0.279986	1.34866
TFDP1	sp|Q14186|TFDP1-HUMAN	0.431777	0.0191983	0.153903	0.706175	0.999979	0.320902	1.34551
FKBP5	tr|Q2TA84|Q2TA84-HUMAN	0.363881	0.00971257	0.166363	0.557962	1	0.270837	1.34354
CNOT10	sp|Q9H9A5-6|CNO10-HUMAN	0.452596	0.0233544	0.155679	0.748383	0.99983	0.337655	1.34041
HNRNPC	tr|B4DY08|B4DY08-HUMAN	0.575284	0.0609719	0.082536	1.07071	0.957286	0.429223	1.34029
CRK	tr|L7RT18|L7RT18-HUMAN	0.496725	0.0338946	0.126924	0.851127	0.996868	0.370637	1.34019
RDH13	tr|A0A024R4M8|A0A024R4M8-HUMAN	0.552597	0.0522707	0.0889551	1.00752	0.974821	0.413733	1.33564
TSPYL1	sp|Q9H0U9|TSYL1-HUMAN	0.665841	0.110293	0.0198954	1.34756	0.842837	0.498774	1.33496
CEP63	sp|Q96MT8|CEP63-HUMAN	0.569207	0.0593809	0.10947	1.01621	0.961457	0.428108	1.32959
	sp|Q6ZNX1|YE028-HUMAN	0.593329	0.0703083	0.0361369	1.11656	0.937448	0.446897	1.32766
FNDC3A	sp|Q9Y2H6|FND3A-HUMAN	1.19247	1.1495	-0.781413	3.36052	0.408335	0.899098	1.3263
TOM1L1	sp|O75674|TM1L1-HUMAN	0.479376	0.0300614	0.136979	0.832878	0.998662	0.361683	1.3254
POLRMT	sp|O00411|RPOM-HUMAN	0.439258	0.0211985	0.149212	0.725525	0.999941	0.331461	1.32522
SNF1LK2	tr|A0A024R3G7|A0A024R3G7-HUMAN	0.697621	0.134948	-0.0496822	1.42508	0.794781	0.526579	1.32482
YTHDC1	tr|J3QR07|J3QR07-HUMAN	0.70886	0.144512	-0.0574776	1.44362	0.778117	0.53628	1.32181
	tr|F4ZW62|F4ZW62-HUMAN	0.546579	0.0512582	0.0857272	0.98769	0.977396	0.414218	1.31955
FAM117A	sp|Q9C073|F117A-HUMAN	0.596338	0.0727684	0.0709807	1.1262	0.932725	0.452355	1.3183
DIEXF	sp|Q68CQ4|DIEXF-HUMAN	0.483037	0.0314219	0.136259	0.844547	0.998229	0.366974	1.31627
HEL-S-123m	tr|V9HW26|V9HW26-HUMAN	0.324809	0.00643034	0.165138	0.483277	1	0.246882	1.31565
SNAPC1	sp|Q16533|SNPC1-HUMAN	0.555065	0.0548831	0.0911314	1.0226	0.971233	0.422061	1.31513
RPS27	sp|P42677|RS27-HUMAN	0.660056	0.110123	0.0179907	1.35735	0.847176	0.502757	1.31287
ARL1	tr|F8VYN9|F8VYN9-HUMAN	0.543619	0.0507054	0.0747372	1.00194	0.978656	0.414221	1.31239
PPP1CB	sp|P62140|PP1B-HUMAN	0.391401	0.0136421	0.158897	0.626153	1	0.298414	1.31161
MTHFD1L	tr|B7ZM99|B7ZM99-HUMAN	0.544481	0.0512691	0.10668	1.0018	0.977878	0.415858	1.3093
CDC34	sp|P49427|UB2R1-HUMAN	0.675465	0.121598	-0.0123943	1.36213	0.823989	0.51625	1.30841
COG2	sp|Q14746|COG2-HUMAN	0.551049	0.0538644	0.0806477	1.01433	0.973468	0.421173	1.30837
IDH3A	sp|P50213|IDH3A-HUMAN	0.978234	0.535266	-0.519557	2.3888	0.508441	0.747897	1.30798
CEP78	sp|Q5JTW2-2|CEP78-HUMAN	0.689581	0.132302	-0.0399608	1.39919	0.803286	0.52747	1.30734
DSTN	sp|P60981|DEST-HUMAN	0.672363	0.119642	-0.0215838	1.38408	0.828236	0.514444	1.30697
METTL2B	sp|Q6P1Q9|MET2B-HUMAN	0.45974	0.0262644	0.140567	0.7881	0.999571	0.35251	1.30419
FTSJ3	sp|Q8IY81|SPB1-HUMAN	0.481797	0.0317321	0.123052	0.833367	0.998187	0.369731	1.3031
TTC37	sp|Q6PGP7|TTC37-HUMAN	1.13993	0.997692	-0.866312	3.16542	0.428213	0.876234	1.30094
THUMPD3	sp|Q9BV44|THUM3-HUMAN	0.493514	0.035127	0.119439	0.857682	0.996558	0.37977	1.29951
	tr|B2RAD8|B2RAD8-HUMAN	0.686697	0.131895	-0.0381477	1.39918	0.805842	0.52887	1.29842
CBX8	sp|Q9HC52|CBX8-HUMAN	0.499829	0.0370956	0.112896	0.867619	0.995297	0.385336	1.29712
YME1L1	sp|Q96TA2|YMEL1-HUMAN	0.765373	0.204247	-0.131124	1.67337	0.698128	0.590479	1.29619
HIST1H4A	sp|P62805|H4-HUMAN	0.356803	0.00974895	0.166397	0.550308	1	0.276726	1.28937
	tr|A0A140VJX5|A0A140VJX5-HUMAN	0.474461	0.030602	0.117277	0.816716	0.998669	0.368701	1.28684
WWC2	sp|Q6AWC2-6|WWC2-HUMAN	0.309959	0.00558936	0.161872	0.457297	1	0.2412	1.28507
DKFZp781N0678	tr|Q5H9Q6|Q5H9Q6-HUMAN	0.526215	0.046621	0.0999257	0.958621	0.985892	0.410325	1.28244
TANGO6	sp|Q9C0B7|TNG6-HUMAN	0.502567	0.038944	0.115834	0.885511	0.994143	0.392669	1.27988
INTS5	sp|Q6P9B9|INT5-HUMAN	0.535695	0.0504002	0.101371	0.970786	0.980688	0.419082	1.27826
NSMCE1	sp|Q8WV22|NSE1-HUMAN	0.884636	0.374877	-0.336457	2.0957	0.573684	0.692117	1.27816
DHX37	sp|Q8IY37|DHX37-HUMAN	0.52598	0.047073	0.100001	0.945576	0.985548	0.412493	1.27512
CEP131	sp|Q9UPN4-2|CP131-HUMAN	0.404373	0.016511	0.155296	0.6581	0.999998	0.317764	1.27256
TRAPPC3	tr|A0A087WWM0|A0A087WWM0-HUMAN	0.506019	0.0406447	0.0993435	0.904042	0.992862	0.398415	1.27008
	tr|Q8TA92|Q8TA92-HUMAN	0.483522	0.0339165	0.114354	0.839133	0.99748	0.380881	1.26948
FYTTD1	tr|A0A024R9K4|A0A024R9K4-HUMAN	0.653034	0.113432	-0.00342927	1.328	0.84854	0.515741	1.2662
WIZ	tr|M0QXA7|M0QXA7-HUMAN	0.551544	0.0582916	0.062263	1.04279	0.968376	0.437747	1.25996
MCM6	sp|Q14566|MCM6-HUMAN	0.543046	0.0549366	0.0731419	0.996641	0.974387	0.431613	1.25818
FLJ00380	tr|Q8NF22|Q8NF22-HUMAN	0.540687	0.0540306	0.0828598	1.00077	0.975923	0.429906	1.25769
CHEK1	sp|O14757|CHK1-HUMAN	0.464268	0.0294859	0.119214	0.799213	0.999095	0.369861	1.25525
MED10	sp|Q9BTT4|MED10-HUMAN	0.508291	0.0423735	0.0909773	0.940557	0.991546	0.404981	1.2551
YTHDC2	sp|Q9H6S0|YTDC2-HUMAN	1.10983	0.967337	-0.927065	2.97982	0.439573	0.886201	1.25235
UAP1	sp|Q16222|UAP1-HUMAN	0.64634	0.111362	0.0368119	1.22743	0.855378	0.516306	1.25185
PEF1	sp|Q9UBV8|PEF1-HUMAN	0.558179	0.0620564	0.0509594	1.0748	0.961934	0.446293	1.2507
NSF	sp|P46459|NSF-HUMAN	1.00367	0.650766	-0.080994	2.29133	0.491685	0.803751	1.24873
FAM188B	sp|Q4G0A6|F188B-HUMAN	0.432377	0.0224139	0.136276	0.733574	0.999925	0.346255	1.24872
FARS2	sp|O95363|SYFM-HUMAN	0.622534	0.0964797	-0.0349829	1.22175	0.887861	0.498948	1.24769
NOL10	sp|Q9BSC4|NOL10-HUMAN	0.50234	0.0410251	0.0921569	0.909849	0.992995	0.403206	1.24586
SLC7A5	sp|Q01650|LAT1-HUMAN	1.22809	1.46594	-1.00333	3.61591	0.392421	0.985889	1.24567
XPO6	sp|Q96QU8|XPO6-HUMAN	0.539604	0.0546596	0.0811321	0.998642	0.975537	0.433269	1.24542
ASPH	sp|Q12797|ASPH-HUMAN	0.733353	0.18653	-0.124263	1.57202	0.731483	0.588927	1.24524
GTF3C2	sp|Q8WUA4|TF3C2-HUMAN	0.503439	0.0414876	0.0905663	0.89638	0.992613	0.404587	1.24433
YOD1	sp|Q5VVQ6|OTU1-HUMAN	0.563518	0.0653242	0.0662267	1.05726	0.95616	0.453554	1.24245
FBXL17	sp|Q9UF56|FXL17-HUMAN	0.742635	0.197161	-0.145394	1.63387	0.718869	0.597909	1.24205
	tr|A0A140VK00|A0A140VK00-HUMAN	0.776608	0.235836	-0.203839	1.77672	0.677117	0.625321	1.24193
PPP4C	tr|A0A024R625|A0A024R625-HUMAN	0.61161	0.0910799	0.00893378	1.19502	0.900942	0.493443	1.23948
	tr|A0A140VJF4|A0A140VJF4-HUMAN	0.407883	0.0180189	0.136323	0.671636	0.999995	0.3291	1.23939
ZBTB24	sp|O43167|ZBT24-HUMAN	0.683986	0.1428	-0.0528756	1.42552	0.798492	0.55248	1.23803
SAV1	sp|Q9H4B6|SAV1-HUMAN	0.975968	0.592302	-0.578741	2.51368	0.507333	0.788562	1.23765
FBXL19	sp|Q6PCT2|FXL19-HUMAN	0.613096	0.0923057	-0.00946269	1.21881	0.898574	0.495548	1.23721
CLU	sp|P10909-2|CLUS-HUMAN	0.504194	0.0422711	0.0977478	0.919554	0.992057	0.407778	1.23644
C11orf48	tr|L0R588|L0R588-HUMAN	0.447787	0.026304	0.132584	0.775193	0.999669	0.362192	1.23632
MRPS10	tr|A0A024RD03|A0A024RD03-HUMAN	0.551562	0.0606833	0.065345	1.04211	0.965651	0.446622	1.23496
CDR2	sp|Q01850|CDR2-HUMAN	0.549771	0.0601298	0.0457234	1.02684	0.966826	0.446029	1.23259
UBAC1	sp|Q9BSL1|UBAC1-HUMAN	0.546505	0.0587853	0.0705529	1.01539	0.969287	0.44365	1.23184
SLC25A13	sp|Q9UJS0-2|CMC2-HUMAN	0.564757	0.0670629	0.0459593	1.06942	0.95359	0.458542	1.23164
KNTC1	sp|P50748|KNTC1-HUMAN	0.320865	0.00699765	0.154861	0.482484	1	0.260708	1.23075
	tr|B3KSQ1|B3KSQ1-HUMAN	0.495703	0.0400402	0.101956	0.887184	0.994136	0.40367	1.22799
SDHB	sp|P21912|SDHB-HUMAN	0.508225	0.0444453	0.0783372	0.91743	0.990167	0.414817	1.22518
RPS13	sp|P62277|RS13-HUMAN	0.35334	0.01039	0.145017	0.552563	1	0.28848	1.22484
GSK3B	sp|P49841-2|GSK3B-HUMAN	0.646984	0.116847	-0.0348227	1.31471	0.849133	0.528342	1.22456
COG7	sp|P83436|COG7-HUMAN	0.480503	0.0356464	0.109645	0.856967	0.997034	0.392927	1.22288
VDAC3	sp|Q9Y277-2|VDAC3-HUMAN	0.85077	0.350801	-0.290905	2.0128	0.598573	0.696175	1.22206
RPSA	tr|A0A0C4DG17|A0A0C4DG17-HUMAN	0.371877	0.012813	0.143358	0.601103	1	0.304387	1.22172
	tr|B3KRM2|B3KRM2-HUMAN	0.577116	0.0746512	0.0320442	1.11866	0.93916	0.473429	1.21901
TIMM50	sp|Q3ZCQ8-2|TIM50-HUMAN	0.607499	0.0917075	0.00591426	1.2063	0.902529	0.49849	1.21868
SLC25A3	tr|A0A024RBH9|A0A024RBH9-HUMAN	0.410375	0.0191371	0.138157	0.683145	0.99999	0.337099	1.21737
MYBBP1A	sp|Q9BQG0-2|MBB1A-HUMAN	0.421797	0.0215821	0.129357	0.717669	0.999959	0.348292	1.21104
MAGT1	tr|A0A087WU53|A0A087WU53-HUMAN	0.523708	0.0513921	0.0679918	0.982228	0.982179	0.432871	1.20985
SC5DL	tr|A0A024R3G4|A0A024R3G4-HUMAN	0.656349	0.127051	-0.0194635	1.39801	0.832504	0.543068	1.20859
CCDC58	sp|Q4VC31|CCD58-HUMAN	0.538698	0.0578138	0.0802643	1.01962	0.972478	0.446345	1.20691
TAF4B	tr|J3KTH2|J3KTH2-HUMAN	0.503076	0.0441289	0.0892166	0.915662	0.990998	0.417569	1.20477
ATIC	sp|P31939|PUR9-HUMAN	0.512441	0.0475278	0.0802796	0.950348	0.987338	0.425432	1.20452
PRPS2	sp|P11908-2|PRPS2-HUMAN	0.656105	0.128408	-0.0553608	1.36818	0.831392	0.546164	1.2013
MRPS27	sp|Q92552-2|RT27-HUMAN	0.635068	0.112787	-0.024627	1.29651	0.8614	0.528822	1.20091
NRDE2	sp|Q9H7Z3|NRDE2-HUMAN	0.522512	0.0518697	0.0565032	0.972012	0.981983	0.435874	1.19877
BAZ2B	sp|Q9UIF8|BAZ2B-HUMAN	0.583375	0.0806336	0.0220808	1.16291	0.928838	0.486755	1.1985
RBBP4	sp|Q09028|RBBP4-HUMAN	0.329747	0.00825634	0.150819	0.506379	1	0.275558	1.19665
OGT	sp|O15294|OGT1-HUMAN	0.324613	0.00776443	0.147871	0.499106	1	0.271449	1.19585
ZNF655	tr|D6W5T3|D6W5T3-HUMAN	0.593295	0.0866699	-0.0108261	1.19676	0.916435	0.496208	1.19566
RPS10	sp|P46783|RS10-HUMAN	0.568199	0.0734123	0.0327139	1.10184	0.944495	0.476852	1.19156
NKTR	sp|P30414|NKTR-HUMAN	0.59618	0.0891892	-0.0093414	1.1983	0.91184	0.500932	1.19014
SSX2IP	sp|Q9Y2D8|ADIP-HUMAN	0.519583	0.051492	0.0736118	0.959367	0.982876	0.436732	1.18971
TBCCD1	sp|Q9NVR7|TBCC1-HUMAN	0.547588	0.0635238	0.0265428	1.04745	0.963674	0.460272	1.18971
NDEL1-PDGFRB	tr|A0A1G4P1I6|A0A1G4P1I6-HUMAN	0.752684	0.227384	-0.213132	1.70293	0.697878	0.63353	1.18808
TMCO1	tr|J9JIE6|J9JIE6-HUMAN	0.530108	0.0560138	0.0458341	1.03098	0.976451	0.446461	1.18736
PPP3CB	sp|P16298-4|PP2BB-HUMAN	0.98233	0.669002	-0.670081	2.57661	0.500934	0.832638	1.17978
RPS7	sp|P62081|RS7-HUMAN	0.479718	0.0381938	0.0891158	0.868342	0.996119	0.40739	1.17754
TPGS2	sp|Q68CL5|TPGS2-HUMAN	0.956305	0.608153	-0.578793	2.53411	0.516281	0.815474	1.1727
AACS	tr|A0A024RBV2|A0A024RBV2-HUMAN	1.03388	0.831253	-0.749246	2.89269	0.472331	0.881854	1.17239
YBEY	sp|P58557|YBEY-HUMAN	0.509826	0.0492928	0.0735056	0.935027	0.986371	0.435482	1.17072
ANAPC2	sp|Q9UJX6|ANC2-HUMAN	0.478926	0.0383861	0.0873995	0.866732	0.996088	0.40909	1.17071
IKBIP	sp|Q70UQ0-4|IKIP-HUMAN	0.490777	0.0424864	0.0713746	0.893744	0.993254	0.419992	1.16854
STRN4	sp|Q9NRL3-3|STRN4-HUMAN	0.597697	0.0935636	0.0139337	1.18689	0.905783	0.511767	1.16791
MTPAP	sp|Q9NVV4|PAPD1-HUMAN	0.505271	0.0480659	0.0744021	0.942941	0.987983	0.433905	1.16448
CDK11B	tr|J3QR44|J3QR44-HUMAN	0.409227	0.0207851	0.127024	0.699133	0.999979	0.352299	1.16159
AASDHPPT	sp|Q9NRN7|ADPPT-HUMAN	0.539564	0.0629685	0.0497316	1.02947	0.966738	0.46507	1.16018
RSPRY1	sp|Q96DX4|RSPRY-HUMAN	0.604571	0.0992883	-0.0283403	1.24582	0.895248	0.521197	1.15997
SSRP1	sp|Q08945|SSRP1-HUMAN	0.547565	0.0669585	0.0403413	1.04719	0.959807	0.472571	1.15869
ECHDC1	sp|Q9NTX5|ECHD1-HUMAN	0.625084	0.114485	-0.0434454	1.30662	0.866079	0.541297	1.15479
DCLRE1A	sp|Q6PJP8|DCR1A-HUMAN	0.523534	0.0566006	0.0174544	1.00046	0.977397	0.454429	1.15207
KLF16	sp|Q9BXK1|KLF16-HUMAN	0.559903	0.0741346	0.0366306	1.10196	0.946992	0.486293	1.15137
RPGRIP1L	sp|Q68CZ1|FTM-HUMAN	0.635953	0.124565	-0.0794237	1.35077	0.84884	0.554974	1.14591
SCO2	sp|O43819|SCO2-HUMAN	0.557969	0.0738827	0.0159918	1.11691	0.948049	0.487148	1.14538
C8orf82	sp|Q6P1X6|CH082-HUMAN	0.495201	0.0459101	0.070019	0.93311	0.990762	0.432686	1.14448
LRRC47	tr|A0A024R4G1|A0A024R4G1-HUMAN	0.553009	0.0715003	-0.00645751	1.07857	0.952703	0.483528	1.1437
WDR26	sp|Q9H7D7|WDR26-HUMAN	0.468233	0.0367926	0.0773142	0.839939	0.997217	0.409655	1.14299
PDS5A	tr|G1UI16|G1UI16-HUMAN	0.528945	0.0600231	0.0462484	1.01535	0.972741	0.463179	1.14199
ZNF777	sp|Q9ULD5-3|ZN777-HUMAN	0.533816	0.0623888	0.0778281	1.03205	0.969007	0.467909	1.14085
ABHD16A	tr|A0A0G2JJD3|A0A0G2JJD3-HUMAN	0.549557	0.0701937	0.061284	1.02217	0.95545	0.482099	1.13993
CIR1	sp|Q86X95|CIR1-HUMAN	0.848123	0.400274	-0.460583	2.10703	0.593113	0.745967	1.13694
ECH1	sp|Q13011|ECH1-HUMAN	0.840849	0.386815	-0.405275	2.09273	0.599444	0.739663	1.1368
COA5	sp|Q86WW8|COA5-HUMAN	0.763368	0.263808	-0.312355	1.76755	0.677199	0.672837	1.13455
PUM3	sp|Q15397|PUM3-HUMAN	0.538899	0.0657016	0.0515953	1.05275	0.963983	0.475642	1.13299
DUSP23	tr|A0A140VJI5|A0A140VJI5-HUMAN	0.712172	0.2004	-0.146781	1.59303	0.73981	0.628585	1.13298
KMT2B	sp|Q9UMN6|KMT2B-HUMAN	0.576983	0.0863754	-0.0172281	1.17032	0.924973	0.509368	1.13274
C8orf76	sp|Q96K31|CH076-HUMAN	0.681248	0.168198	-0.140092	1.52276	0.781464	0.602012	1.13162
MGEA5	sp|O60502|OGA-HUMAN	0.371222	0.0148735	0.133612	0.618649	1	0.328528	1.12995
SERPINH1	sp|P50454|SERPH-HUMAN	0.360949	0.0133603	0.132753	0.592291	1	0.32023	1.12715
CHD9	sp|Q3L8U1|CHD9-HUMAN	0.470202	0.038675	0.0899378	0.858332	0.99647	0.418245	1.12423
ESPL1	sp|Q14674|ESPL1-HUMAN	0.389902	0.0183024	0.122696	0.654306	0.999997	0.346975	1.12372
ESCO2	sp|Q56NI9|ESCO2-HUMAN	0.737066	0.233939	-0.208248	1.69394	0.706484	0.656213	1.12321
URGCP	sp|Q8TCY9|URGCP-HUMAN	0.543053	0.0690336	0.0481965	1.0627	0.958995	0.483825	1.12242
ISYNA1	sp|Q9NPH2|INO1-HUMAN	0.848143	0.411844	-0.443182	2.10819	0.591538	0.756654	1.12091
ADAM17	tr|B2RNB2|B2RNB2-HUMAN	0.492415	0.0467953	0.0855593	0.92138	0.990523	0.439309	1.12089
MTHFR	sp|P42898-2|MTHR-HUMAN	0.683581	0.174223	-0.134165	1.50877	0.775768	0.610608	1.11951
CDT1	sp|Q9H211|CDT1-HUMAN	0.463083	0.0368795	0.0721447	0.851445	0.997412	0.4147	1.11667
DDX49	sp|Q9Y6V7|DDX49-HUMAN	0.408776	0.0224459	0.104864	0.702935	0.99996	0.366508	1.11533
hCG_1979072	tr|A0A024R2A3|A0A024R2A3-HUMAN	0.512181	0.0553556	0.0391781	0.983805	0.980931	0.459364	1.11498
TH1L	tr|H0UI80|H0UI80-HUMAN	0.552697	0.0751813	0.015679	1.09412	0.948592	0.496098	1.11409
UBE3C	sp|Q15386|UBE3C-HUMAN	0.971269	0.717598	-0.699568	2.66093	0.503547	0.87217	1.11362
PTRH2	tr|J3KQ48|J3KQ48-HUMAN	0.308326	0.00729121	0.136542	0.478011	1	0.276943	1.11332
TFAM	tr|Q6LES8|Q6LES8-HUMAN	0.430616	0.0277612	0.103621	0.769246	0.999684	0.386927	1.11291
EXOSC3	sp|Q9NQT5|EXOS3-HUMAN	0.615233	0.11733	-0.0642159	1.29744	0.869342	0.556756	1.10503
RBM41	sp|Q96IZ5|RBM41-HUMAN	0.565807	0.0851097	-0.0188266	1.16776	0.931665	0.51561	1.09735
VPS4A	tr|A0A024R705|A0A024R705-HUMAN	0.497033	0.0508421	0.0558644	0.976567	0.987147	0.453656	1.09562
CEP68	sp|Q76N32|CEP68-HUMAN	0.528572	0.0652001	0.00234912	1.03076	0.967572	0.483081	1.09417
CDC123	sp|O75794|CD123-HUMAN	0.339361	0.0110959	0.125507	0.547111	1	0.310398	1.09331
OSER1	sp|Q9NX31|OSER1-HUMAN	0.41037	0.0239215	0.103624	0.716655	0.999931	0.376893	1.08882
DNAJA2	sp|O60884|DNJA2-HUMAN	0.386499	0.0189405	0.11934	0.65813	0.999996	0.35608	1.08543
RPL34	tr|A0A024RDH8|A0A024RDH8-HUMAN	0.365414	0.015186	0.124367	0.60755	1	0.337238	1.08355
RASSF3	tr|A0A1B0GUG6|A0A1B0GUG6-HUMAN	0.491554	0.0497626	0.0463422	0.941035	0.988674	0.453817	1.08316
C1orf131	sp|Q8NDD1|CA131-HUMAN	0.392447	0.0202263	0.117166	0.67029	0.99999	0.362391	1.08294
ZNF724	sp|A8MTY0|ZN724-HUMAN	0.57192	0.0914656	-0.0123555	1.17573	0.921532	0.528803	1.08154
RPL26	sp|P61254|RL26-HUMAN	0.540521	0.072974	0.0176002	1.07834	0.95552	0.499772	1.08154
ICAM1	sp|P05362|ICAM1-HUMAN	0.516727	0.0611726	0.0339568	1.01419	0.974647	0.478649	1.07955
PARP2	sp|Q9UGN5|PARP2-HUMAN	0.512783	0.0594241	0.0113857	1.01616	0.977178	0.475387	1.07866
INPP5B	sp|P32019|I5P2-HUMAN	0.445022	0.0338236	0.0817054	0.815724	0.998726	0.413265	1.07684
LPIN2	sp|Q92539|LPIN2-HUMAN	0.454318	0.0368181	0.0692568	0.863483	0.997772	0.422348	1.0757
UTP14A	sp|Q9BVJ6|UT14A-HUMAN	0.427936	0.0290034	0.0993444	0.764511	0.999609	0.397966	1.07531
HAT1	sp|O14929|HAT1-HUMAN	0.778333	0.320569	-0.327727	1.91982	0.651447	0.727437	1.06997
MAGEA9	sp|P43362|MAGA9-HUMAN	0.774628	0.315482	-0.324992	1.88651	0.655091	0.725094	1.06831
DNTTIP2	sp|Q5QJE6|TDIF2-HUMAN	0.411346	0.0251279	0.0958606	0.732811	0.999898	0.385364	1.06742
HARS	sp|P12081|SYHC-HUMAN	0.424888	0.0286202	0.0845337	0.768489	0.999662	0.398164	1.06712
ZCCHC8	sp|Q6NZY4|ZCHC8-HUMAN	0.395827	0.0216941	0.113791	0.679212	0.99998	0.372105	1.06375
	tr|A8K8V8|A8K8V8-HUMAN	0.360472	0.0149273	0.122418	0.597251	1	0.338937	1.06354
CENPH	tr|A0A0S2Z5T0|A0A0S2Z5T0-HUMAN	0.541656	0.0761164	-0.0118176	1.07289	0.951675	0.509349	1.06343
ATP1A1	sp|P05023|AT1A1-HUMAN	0.508454	0.0592202	0.0107145	0.989531	0.978303	0.478612	1.06235
CC2D1A	sp|Q6P1N0|C2D1A-HUMAN	0.395247	0.0216264	0.104263	0.685926	0.99998	0.372069	1.06229
ARPC5	sp|O15511-2|ARPC5-HUMAN	0.671885	0.181503	-0.0250275	1.39038	0.779356	0.634084	1.05961
SMURF1	sp|Q9HCE7|SMUF1-HUMAN	0.659579	0.169016	0.0964384	1.19013	0.79615	0.6233	1.0582
MRPL39	sp|Q9NYK5-2|RM39-HUMAN	0.527297	0.0692945	-0.00705106	1.02151	0.963731	0.499222	1.05624
TMED2	sp|Q15363|TMED2-HUMAN	0.478627	0.0470612	0.0544548	0.907126	0.991877	0.453246	1.056
	tr|Q59E89|Q59E89-HUMAN	0.490061	0.0517488	0.0501145	0.943967	0.987508	0.464195	1.05572
PSMB6	tr|Q6IAT9|Q6IAT9-HUMAN	0.498487	0.0554188	0.0318387	0.973752	0.983429	0.472253	1.05555
CDKAL1	sp|Q5VV42|CDKAL-HUMAN	0.473265	0.0450421	0.0551702	0.881355	0.993466	0.448441	1.05536
DONSON	sp|Q9NYP3|DONS-HUMAN	0.571392	0.0958937	-0.0843371	1.17852	0.916835	0.541952	1.05432
LDHA	sp|P00338-3|LDHA-HUMAN	1.00454	0.916602	-0.90733	2.95761	0.479967	0.953066	1.05401
	tr|B2RDI6|B2RDI6-HUMAN	0.572105	0.0965076	-0.066304	1.2157	0.915804	0.543006	1.05359
OXA1L	tr|Q2M1J6|Q2M1J6-HUMAN	0.492641	0.0531467	0.0248667	0.927915	0.986124	0.467959	1.05274
KAT7	sp|O95251|KAT7-HUMAN	0.698691	0.215332	-0.23108	1.61526	0.741808	0.664155	1.052
IKBKAP	tr|Q4LE38|Q4LE38-HUMAN	0.377475	0.0184454	0.105639	0.642016	0.999998	0.359796	1.04914
MEIOB	sp|Q8N635-2|MEIOB-HUMAN	0.375828	0.0181789	0.101425	0.637656	0.999998	0.358752	1.0476
RPS26	sp|P62854|RS26-HUMAN	0.381418	0.0193175	0.103121	0.655021	0.999996	0.364397	1.04671
TRMT1L	sp|Q7Z2T5|TRM1L-HUMAN	0.396945	0.0227779	0.101622	0.691445	0.999968	0.380213	1.04401
	tr|Q76N57|Q76N57-HUMAN	0.571311	0.0977635	-0.0768234	1.18703	0.91482	0.547288	1.04389
UNC13D	sp|Q70J99-3|UN13D-HUMAN	0.433747	0.0325669	0.0716059	0.787787	0.999149	0.416056	1.04252
SREBF1	sp|P36956-4|SRBP1-HUMAN	0.531932	0.0737641	-0.0169785	1.05628	0.957592	0.510583	1.04181
RPS19BP1	tr|A0A024R1T1|A0A024R1T1-HUMAN	0.69279	0.213053	-0.157779	1.55647	0.747033	0.666258	1.03982
BUB1	sp|O43683|BUB1-HUMAN	0.326145	0.0104708	0.127333	0.525989	1	0.313747	1.03952
SMYD4	sp|Q8IYR2|SMYD4-HUMAN	0.513248	0.0644389	-0.00939848	1.02527	0.972412	0.494592	1.03772
DECR1	tr|A0A024R9D7|A0A024R9D7-HUMAN	1.3046	2.7071	-2.15275	4.55581	0.345911	1.26117	1.03443
	tr|B4DZH6|B4DZH6-HUMAN	0.478091	0.0489038	0.0180406	0.910928	0.990864	0.462552	1.03359
	tr|Q59EH3|Q59EH3-HUMAN	0.490585	0.0543255	0.0204261	0.95419	0.985577	0.475103	1.03259
C19orf53	sp|Q9UNZ5|L10K-HUMAN	0.553676	0.0883295	-0.0462241	1.15787	0.933419	0.536781	1.03147
VRK1	sp|Q99986|VRK1-HUMAN	0.601717	0.123356	-0.10572	1.30112	0.871599	0.583698	1.03087
ATP5J2-PTCD1	tr|G3V325|G3V325-HUMAN	0.476551	0.0485544	0.0162866	0.91821	0.991238	0.462386	1.03063
SCAF11	sp|Q99590|SCAFB-HUMAN	0.58012	0.106681	-0.0476914	1.22042	0.900695	0.563022	1.03037
COL4A3BP	sp|Q9Y5P4-3|C43BP-HUMAN	0.687293	0.210988	-0.245614	1.59723	0.751876	0.668324	1.02838
EXOC8	sp|Q8IYI6|EXOC8-HUMAN	0.445707	0.0373166	0.053576	0.829055	0.997944	0.433413	1.02837
NUDT16L1	sp|Q9BRJ7|SDOS-HUMAN	0.528916	0.0740354	-0.0064856	1.05381	0.958303	0.514438	1.02814
	tr|Q59GW7|Q59GW7-HUMAN	0.335051	0.0119673	0.119122	0.551485	1	0.326503	1.02618
ELAVL1	sp|Q15717-2|ELAV1-HUMAN	0.491341	0.0559442	0.0327979	0.952026	0.984244	0.481387	1.02068
	tr|B2R8R5|B2R8R5-HUMAN	0.382057	0.0204911	0.0929519	0.66562	0.999992	0.374675	1.0197
C12orf57	sp|Q99622|C10-HUMAN	0.480514	0.0513264	0.0793359	0.897183	0.989076	0.471481	1.01916
PTMS	tr|F5GXR3|F5GXR3-HUMAN	0.513056	0.0670926	0.0135224	1.05067	0.969941	0.504862	1.01623
SLC30A6	sp|Q6NXT4-2|ZNT6-HUMAN	0.436041	0.0350618	0.0671334	0.797491	0.998702	0.429427	1.0154
SPR	sp|P35270|SPRE-HUMAN	0.475181	0.0496091	0.0362162	0.906081	0.990771	0.468729	1.01377
TPRN	sp|Q4KMQ1|TPRN-HUMAN	0.593725	0.121564	-0.123364	1.26536	0.878038	0.587242	1.01104
RNF111	sp|Q6ZNA4-3|RN111-HUMAN	1.00991	1.01989	-0.928926	3.01559	0.472802	0.999986	1.00992
CIRBP	tr|Q53XX5|Q53XX5-HUMAN	0.556982	0.0943905	-0.0489171	1.18953	0.925345	0.551598	1.00976
SEC23A	sp|Q15436|SC23A-HUMAN	0.483769	0.0540955	0.000236867	0.959358	0.986775	0.480776	1.00623
NCDN	sp|Q9UBB6-3|NCDN-HUMAN	0.51571	0.0700693	-0.0205954	1.04117	0.966341	0.513285	1.00473
SIPA1L3	sp|O60292|SI1L3-HUMAN	0.470573	0.048785	0.0207122	0.92387	0.991734	0.469371	1.00256
ALDH1B1	sp|P30837|AL1B1-HUMAN	0.508734	0.0668207	-0.00340884	1.01899	0.971314	0.508118	1.00121
	tr|B4DG73|B4DG73-HUMAN	0.536873	0.0830186	-0.0455898	1.13409	0.946012	0.536681	1.00036
SRSF9	sp|Q13242|SRSF9-HUMAN	0.34071	0.0134721	0.114571	0.576337	1	0.340669	1.00012
TSPYL4	sp|Q9UJ04|TSYL4-HUMAN	0.508743	0.0672686	-0.0196881	1.01574	0.970894	0.509809	0.997908
IKZF1	sp|Q13422|IKZF1-HUMAN	0.344122	0.0141226	0.106264	0.57607	1	0.345338	0.996478
SF3A3	sp|Q12874|SF3A3-HUMAN	0.346794	0.0145676	0.11533	0.581304	1	0.348035	0.996435
PPAT	tr|A8K4H7|A8K4H7-HUMAN	0.576125	0.111027	-0.0813361	1.23996	0.898331	0.578359	0.996137
GTF3C4	sp|Q9UKN8|TF3C4-HUMAN	0.389323	0.0231764	0.0847136	0.692413	0.99997	0.391033	0.995628
ARNT	sp|P27540|ARNT-HUMAN	0.579466	0.113881	-0.103606	1.25319	0.893647	0.582368	0.995016
FAU	sp|P62861|RS30-HUMAN	0.530036	0.0799612	-0.0210913	1.08156	0.951741	0.5335	0.993507
CFL1	tr|E9PK25|E9PK25-HUMAN	0.36478	0.0179819	0.0998768	0.62587	0.999999	0.36761	0.992303
UBE2H	tr|A4D1L5|A4D1L5-HUMAN	0.530299	0.0804699	-0.0585374	1.0893	0.951118	0.534929	0.991345
TUSC2	sp|O75896|TUSC2-HUMAN	0.470955	0.0501241	0.0275476	0.923114	0.990937	0.475383	0.990685
FBXW11	sp|Q9UKB1|FBW1B-HUMAN	0.544461	0.089614	-0.0808362	1.13836	0.935962	0.549821	0.990252
TIMELESS	sp|Q9UNS1|TIM-HUMAN	0.555532	0.0971668	-0.0760674	1.17848	0.923048	0.561112	0.990055
POLR1B	sp|Q9H9Y6-3|RPA2-HUMAN	0.398767	0.0258572	0.0734737	0.718013	0.999908	0.403247	0.988889
HNRNPC	sp|P07910|HNRPC-HUMAN	0.432011	0.0356263	0.06469	0.810014	0.99869	0.436909	0.98879
RPN2	sp|P04844|RPN2-HUMAN	0.596084	0.129252	-0.117469	1.30678	0.869383	0.60313	0.988317
RINT1	sp|Q6NUQ1|RINT1-HUMAN	0.310688	0.00954481	0.109283	0.501525	1	0.314455	0.988019
SMARCAL1	sp|Q9NZC9|SMAL1-HUMAN	0.526574	0.0788492	-0.0311835	1.07697	0.954101	0.53326	0.987462
PKP2	sp|Q99959|PKP2-HUMAN	0.571589	0.109944	-0.0968697	1.2325	0.901827	0.580099	0.985331
PWP2	sp|Q15269|PWP2-HUMAN	0.373357	0.0200399	0.0841637	0.648395	0.999995	0.379161	0.984693
PIBF1	tr|Q4G0R1|Q4G0R1-HUMAN	0.611064	0.144891	-0.120656	1.35809	0.846546	0.622922	0.980963
FLJ10099	tr|A0A024RDK7|A0A024RDK7-HUMAN	0.560867	0.103151	-0.0488352	1.20476	0.914232	0.572634	0.979452
ANAPC7	tr|A0A024RBJ3|A0A024RBJ3-HUMAN	0.425744	0.0343265	0.061001	0.801163	0.999031	0.435177	0.978323
DIXDC1	sp|Q155Q3|DIXC1-HUMAN	0.550192	0.0958891	-0.0404427	1.18195	0.926831	0.562821	0.977561
MBIP	sp|Q9NS73|MBIP1-HUMAN	0.411981	0.0301981	0.061475	0.750074	0.999643	0.421806	0.976708
NNMT	sp|P40261|NNMT-HUMAN	0.493388	0.0622619	-0.00771755	0.976368	0.978838	0.505735	0.975587
IGHMBP2	sp|P38935|SMBP2-HUMAN	0.49185	0.0617103	-0.017931	0.974779	0.9796	0.505064	0.973838
GGNBP2	sp|Q9H3C7|GGNB2-HUMAN	0.605467	0.141958	-0.0989167	1.27576	0.852472	0.622285	0.972974
WIZ	sp|O95785|WIZ-HUMAN	0.345796	0.0151495	0.104936	0.586308	1	0.355942	0.971495
OSTC	sp|Q9NRP0-2|OSTC-HUMAN	0.532362	0.0854517	-0.0492281	1.12401	0.945172	0.549102	0.969513
DHPS	tr|A0A024R7D0|A0A024R7D0-HUMAN	0.38474	0.0233706	0.081373	0.684371	0.999971	0.397345	0.968277
APEX1	tr|Q5TZP7|Q5TZP7-HUMAN	0.657321	0.199182	-0.229931	1.56633	0.778602	0.678965	0.968122
	tr|A8K6A4|A8K6A4-HUMAN	0.488215	0.0606628	0.0349993	0.932	0.981141	0.504487	0.967745
IKZF4	sp|Q9H2S9|IKZF4-HUMAN	0.533261	0.0868393	-0.0600643	1.13811	0.943387	0.552609	0.964987
DYRK3	sp|O43781|DYRK3-HUMAN	0.760735	0.361893	-0.426733	1.91765	0.652874	0.790782	0.962004
ACSL1	sp|P33121-3|ACSL1-HUMAN	0.498007	0.066714	-0.0428759	1.01667	0.974023	0.518648	0.960202
NUB1	tr|H3BM74|H3BM74-HUMAN	0.432858	0.0382444	0.0441978	0.820534	0.998135	0.451792	0.958091
	tr|B4E1H4|B4E1H4-HUMAN	0.58612	0.128639	-0.131713	1.32906	0.875735	0.611927	0.957826
TGFBRAP1	sp|Q8WUH2|TGFA1-HUMAN	0.412868	0.0317478	0.0507725	0.773342	0.999508	0.431564	0.956678
ASNS	sp|P08243|ASNS-HUMAN	0.475453	0.0558775	0.0226927	0.933371	0.986758	0.497177	0.956306
HSP90AB1	sp|P08238|HS90B-HUMAN	0.4582	0.0482849	0.0331724	0.897888	0.993162	0.479568	0.955442
hCG_1991559	tr|A0A024R8X1|A0A024R8X1-HUMAN	0.396241	0.0270295	0.0746449	0.710591	0.99988	0.414915	0.954992
	tr|B3KWN0|B3KWN0-HUMAN	0.482674	0.0595857	-0.00165896	0.95627	0.982968	0.505728	0.954414
VPS51	sp|Q9UID3|VPS51-HUMAN	0.309467	0.0100737	0.102245	0.50801	1	0.324325	0.954189
GTF3C6	sp|Q969F1|TF3C6-HUMAN	0.472363	0.0548104	-0.00030085	0.953593	0.987894	0.495628	0.95306
VPS39	sp|Q96JC1|VPS39-HUMAN	0.494037	0.065754	-0.0286263	0.99895	0.97576	0.519041	0.951827
FAM98A	sp|Q8NCA5|FA98A-HUMAN	0.545096	0.097468	-0.0514605	1.14368	0.927455	0.572741	0.951733
PSMD10	sp|O75832|PSD10-HUMAN	0.403955	0.0294522	0.0655639	0.747311	0.999743	0.42484	0.950839
RAB14	tr|A0A024R845|A0A024R845-HUMAN	0.511323	0.0758317	-0.0370472	1.05989	0.962017	0.538555	0.949435
ERAL1	sp|O75616|ERAL1-HUMAN	0.356739	0.018101	0.0917687	0.626136	0.999999	0.377138	0.94591
PFAS	sp|O15067|PUR4-HUMAN	0.49266	0.0660273	-0.0177763	1.0015	0.975832	0.521572	0.944567
CDCA5	tr|B5MBX0|B5MBX0-HUMAN	0.531612	0.0901251	-0.0716691	1.13268	0.940645	0.564713	0.941384
INTS3	sp|Q68E01|INT3-HUMAN	0.625017	0.172763	-0.19704	1.45743	0.816469	0.665018	0.939849
PSMA6	tr|G3V5Z7|G3V5Z7-HUMAN	0.447494	0.045541	0.0329533	0.877443	0.995188	0.476885	0.938368
PDPK1	sp|O15530|PDPK1-HUMAN	0.48011	0.0608604	-0.00997602	0.955099	0.982458	0.513839	0.93436
TCF3	sp|P15923-3|TFE2-HUMAN	0.582004	0.132487	-0.201067	1.28191	0.874587	0.625404	0.930605
UBR3	sp|Q6ZT12-4|UBR3-HUMAN	0.59403	0.144214	-0.157724	1.34958	0.857459	0.639286	0.929208
DTWD2	sp|Q8NBA8|DTWD2-HUMAN	0.551962	0.107714	-0.0775935	1.16838	0.913895	0.594603	0.928287
	tr|Q53GL5|Q53GL5-HUMAN	0.493831	0.0696421	0.00271694	1.03521	0.972448	0.534389	0.924104
	tr|A8K099|A8K099-HUMAN	0.529173	0.092169	-0.0935228	1.15009	0.939531	0.573713	0.922365
ANKZF1	sp|Q9H8Y5|ANKZ1-HUMAN	0.567662	0.122115	-0.135951	1.26038	0.891989	0.615594	0.922136
EIF2S3	sp|P41091|IF2G-HUMAN	0.394662	0.0285393	0.058567	0.727572	0.99983	0.428052	0.921996
H2AFZ	sp|P0C0S5|H2AZ-HUMAN	0.482587	0.0638322	-0.0310476	0.994877	0.979717	0.523533	0.921789
PRMT3	tr|Q8WUV3|Q8WUV3-HUMAN	0.324103	0.0129968	0.102064	0.550505	1	0.351751	0.921399
BOLA2	tr|A0A087WZT3|A0A087WZT3-HUMAN	0.42699	0.0392775	0.0373511	0.825809	0.998082	0.464146	0.919948
CBX3	tr|A4D177|A4D177-HUMAN	0.467125	0.0565759	0.00446157	0.938989	0.987465	0.509193	0.917383
RB1CC1	sp|Q8TDY2|RBCC1-HUMAN	0.34637	0.0171491	0.092234	0.595294	1	0.378077	0.916136
SCCPDH	sp|Q8NBX0|SCPDL-HUMAN	0.497304	0.0731469	-0.0572554	1.05658	0.968465	0.543846	0.91442
DGCR14	sp|Q96DF8|DGC14-HUMAN	0.384056	0.0260353	0.06546	0.698882	0.999933	0.420133	0.91413
PSMD7	sp|P51665|PSMD7-HUMAN	0.480435	0.064149	-0.0162715	0.970657	0.979885	0.527182	0.911327
ALDH18A1	sp|P54886|P5CS-HUMAN	0.342295	0.0165343	0.0853919	0.595525	1	0.375658	0.911188
ARRB1	sp|P49407|ARRB1-HUMAN	0.501838	0.076737	-0.0701298	1.05601	0.963937	0.552	0.909127
NRDC	tr|B1AKJ5|B1AKJ5-HUMAN	0.369294	0.0225526	0.0754796	0.667068	0.999987	0.406655	0.908126
RPS24	sp|P62847-4|RS24-HUMAN	0.40945	0.034238	0.042344	0.782732	0.999292	0.451911	0.90604
ASB1	sp|Q9Y576|ASB1-HUMAN	0.557215	0.11793	-0.102374	1.20835	0.901364	0.616296	0.904135
CCDC14	sp|Q49A88|CCD14-HUMAN	0.439982	0.0460329	0.00646148	0.869122	0.995475	0.48764	0.902268
HDAC1	sp|Q13547|HDAC1-HUMAN	0.543501	0.108137	-0.102685	1.19145	0.917461	0.605044	0.898284
POM121	sp|Q96HA1|P121A-HUMAN	0.432257	0.0432695	0.00727736	0.84981	0.996827	0.481226	0.898242
	tr|E5KT65|E5KT65-HUMAN	0.683193	0.270066	-0.331926	1.70698	0.728344	0.760662	0.898156
BAZ1B	sp|Q9UIG0|BAZ1B-HUMAN	0.454547	0.052936	-0.00105701	0.908706	0.991123	0.50617	0.898012
RTCA	sp|O00442-2|RTCA-HUMAN	0.524476	0.0939239	-0.079963	1.13868	0.939623	0.584336	0.897559
DNAJB6	tr|A0A0J9YX62|A0A0J9YX62-HUMAN	0.736258	0.36522	-0.466816	1.93994	0.6667	0.820819	0.89698
	tr|A0A0B4J269|A0A0B4J269-HUMAN	0.277867	0.00742948	0.106242	0.450764	1	0.3102	0.895766
GBF1	sp|Q92538|GBF1-HUMAN	0.464466	0.0580324	-0.0356467	0.967102	0.986894	0.518658	0.895514
SUPT7L	sp|O94864|ST65G-HUMAN	0.461236	0.0568889	-0.0452443	0.924905	0.988053	0.517119	0.891934
RBX1	sp|P62877|RBX1-HUMAN	0.619319	0.185383	-0.233296	1.46464	0.811608	0.695217	0.890828
VAC14	sp|Q08AM6|VAC14-HUMAN	0.546951	0.11279	-0.108259	1.22113	0.911328	0.614026	0.890762
SHROOM1	sp|Q2M3G4|SHRM1-HUMAN	0.498866	0.0780893	-0.0108118	1.04104	0.963539	0.56016	0.890578
PKP4	tr|A0A0D9SF60|A0A0D9SF60-HUMAN	0.400031	0.0323102	0.0423848	0.754777	0.999578	0.449341	0.890261
EIF4A2	sp|Q14240-2|IF4A2-HUMAN	0.392255	0.0303162	0.0514308	0.733805	0.999759	0.443883	0.883689
LSM14A	sp|Q8ND56|LS14A-HUMAN	0.350398	0.0193125	0.0734682	0.624442	0.999999	0.396604	0.883495
CEP97	sp|Q8IW35-2|CEP97-HUMAN	0.357804	0.0210534	0.0755492	0.64288	0.999995	0.405523	0.882326
	tr|B4DEA8|B4DEA8-HUMAN	0.402411	0.0337012	0.0359864	0.766837	0.999433	0.456197	0.882098
NLE1	sp|Q9NVX2|NLE1-HUMAN	0.490998	0.0749672	-0.0363414	1.03994	0.968488	0.557643	0.880489
	tr|B2R848|B2R848-HUMAN	0.826993	0.603382	-0.721637	2.36572	0.578789	0.939278	0.880456
PHF12	sp|Q96QT6|PHF12-HUMAN	0.403538	0.0344216	0.0341133	0.785737	0.999348	0.45976	0.877715
POLR1D	sp|Q9Y2S0-2|RPAC2-HUMAN	0.450807	0.0538117	-0.00441218	0.910377	0.991045	0.514574	0.876078
TFCP2	tr|A0A024R120|A0A024R120-HUMAN	0.513145	0.0904834	-0.0950402	1.08937	0.947223	0.586198	0.875378
RNF40	tr|A0A0S2Z537|A0A0S2Z537-HUMAN	0.479117	0.0687699	-0.0369958	0.999383	0.976499	0.547341	0.875354
LRRC8E	sp|Q6NSJ5|LRC8E-HUMAN	0.468592	0.0629304	-0.0304575	0.96132	0.982927	0.535347	0.875305
PEX7	sp|O00628|PEX7-HUMAN	0.435852	0.0471505	-0.0110006	0.872769	0.995312	0.4982	0.874853
EPM2AIP1	sp|Q7L775|EPMIP-HUMAN	0.488243	0.0746946	-0.0315675	1.01685	0.96943	0.559769	0.872223
ZNF529	sp|Q6P280|ZN529-HUMAN	0.447066	0.0527288	-0.0036993	0.867697	0.991979	0.513632	0.870401
PPP2R5D	sp|Q14738|2A5D-HUMAN	0.314281	0.0129861	0.0922975	0.543543	1	0.362595	0.866756
HSD17B12	sp|Q53GQ0|DHB12-HUMAN	0.520414	0.097707	-0.100586	1.1794	0.937519	0.600639	0.866433
NAMPT	sp|P43490|NAMPT-HUMAN	0.427673	0.044612	0.0112558	0.854183	0.996633	0.493872	0.86596
GOT2	sp|P00505|AATM-HUMAN	0.886501	0.823865	-0.876601	2.71475	0.530919	1.02388	0.865826
TCF12	sp|Q99081-3|HTF4-HUMAN	0.496084	0.0808322	-0.0616802	1.07908	0.961837	0.573109	0.865602
	tr|Q59GL6|Q59GL6-HUMAN	0.438453	0.0497048	-0.00350776	0.890665	0.994112	0.508483	0.862277
ARMC1	sp|Q9NVT9|ARMC1-HUMAN	0.469856	0.0656053	-0.0491785	0.987922	0.980764	0.545136	0.861906
RPS6KB2	sp|Q9UBS0|KS6B2-HUMAN	0.599473	0.174311	-0.254519	1.44731	0.831241	0.696455	0.86075
NUP133	sp|Q8WUM0|NU133-HUMAN	0.296067	0.0104276	0.0942505	0.499086	1	0.344907	0.858396
HSPD1	tr|A0A024R3X4|A0A024R3X4-HUMAN	0.255482	0.00580254	0.104949	0.404588	1	0.29816	0.856863
	tr|A8K719|A8K719-HUMAN	0.449198	0.0555549	-0.0536678	0.907951	0.990277	0.524715	0.85608
MRPL49	tr|A0A024R578|A0A024R578-HUMAN	0.49811	0.0842512	-0.0962097	1.09328	0.958104	0.582724	0.854796
SPICE1	sp|Q8N0Z3|SPICE-HUMAN	0.274101	0.00777741	0.0959605	0.450508	1	0.321741	0.85193
SUGP2	tr|M0R2Z9|M0R2Z9-HUMAN	0.471214	0.0691476	-0.0361368	0.99979	0.977832	0.558046	0.844399
RPS6KA3	sp|P51812|KS6A3-HUMAN	0.324633	0.0156871	0.0680521	0.565447	1	0.385815	0.841422
USF1	tr|A0A0S2Z4U5|A0A0S2Z4U5-HUMAN	0.538699	0.119116	-0.125475	1.21092	0.909318	0.640677	0.840828
TSR1	sp|Q2NL82|TSR1-HUMAN	0.483866	0.0777595	-0.00523783	1.01123	0.967909	0.576304	0.839602
LZTS2	sp|Q9BRK4|LZTS2-HUMAN	0.374253	0.0278451	0.0429094	0.698648	0.999912	0.445871	0.839375
CORO2A	sp|Q92828|COR2A-HUMAN	0.29649	0.0110803	0.0859447	0.50612	1	0.355031	0.835111
RNF8	sp|O76064|RNF8-HUMAN	0.546476	0.129387	-0.144567	1.24892	0.896306	0.658225	0.830227
FAM193A	tr|A0A1B0GVL4|A0A1B0GVL4-HUMAN	0.386906	0.032644	0.0280349	0.762275	0.999655	0.466978	0.828532
CDSN	tr|Q2L6G8|Q2L6G8-HUMAN	0.867686	0.827249	-0.934906	2.71711	0.537818	1.04823	0.827765
	tr|A8K0D2|A8K0D2-HUMAN	0.456118	0.0633985	0.00466603	0.918843	0.984616	0.552029	0.826257
WDR75	sp|Q8IWA0|WDR75-HUMAN	0.393712	0.0352486	0.0159401	0.76147	0.99938	0.476862	0.825632
RPS3	sp|P23396|RS3-HUMAN	0.26381	0.00713978	0.100092	0.430769	1	0.320296	0.823645
PLRG1	sp|O43660|PLRG1-HUMAN	0.345218	0.0211982	0.0600663	0.636468	0.999997	0.421751	0.818535
ADPRHL2	sp|Q9NX46|ARHL2-HUMAN	0.460648	0.0673182	-0.072771	0.987306	0.981181	0.563245	0.817847
	tr|Q53HG9|Q53HG9-HUMAN	0.497098	0.0923797	-0.117436	1.09599	0.950998	0.611429	0.81301
UNC84A	tr|A4D2Q0|A4D2Q0-HUMAN	0.440002	0.0568884	-0.050331	0.913555	0.99056	0.542072	0.811704
	tr|B4DR52|B4DR52-HUMAN	0.421726	0.0480335	-0.00668856	0.867599	0.995837	0.519687	0.8115
	tr|Q5U0C9|Q5U0C9-HUMAN	0.334564	0.0190359	0.0595289	0.606064	0.999999	0.412389	0.811282
DNTTIP1	sp|Q9H147|TDIF1-HUMAN	0.508684	0.101948	-0.114042	1.15867	0.938068	0.627684	0.810414
PSMD4	tr|Q5VWC4|Q5VWC4-HUMAN	0.538027	0.128135	-0.170048	1.26863	0.901566	0.665319	0.808675
MRPL15	sp|Q9P015|RM15-HUMAN	0.426521	0.0508772	-0.00231775	0.864009	0.994496	0.528836	0.806528
	tr|B2R8F3|B2R8F3-HUMAN	0.414177	0.0453819	-0.0131403	0.86692	0.99702	0.514346	0.80525
SMU1	tr|A0MNN4|A0MNN4-HUMAN	0.568041	0.161286	-0.222888	1.38022	0.858896	0.706999	0.803454
MAGEE1	tr|Q6IAI7|Q6IAI7-HUMAN	0.696131	0.364303	-0.474768	1.87434	0.6902	0.867043	0.80288
CAPG	sp|P40121|CAPG-HUMAN	0.540431	0.132788	-0.18694	1.25167	0.896363	0.674278	0.801496
IMMT	sp|Q16891|MIC60-HUMAN	0.502594	0.0999066	-0.124669	1.12642	0.942217	0.628897	0.799167
KLHDC4	sp|Q8TBB5|KLDC4-HUMAN	0.444307	0.0611742	-0.074065	0.948873	0.987671	0.556674	0.798146
PNPT1	sp|Q8TCS8|PNPT1-HUMAN	0.451783	0.0657266	-0.0502837	0.974359	0.983756	0.567467	0.79614
ASXL2	sp|Q76L83|ASXL2-HUMAN	0.384519	0.0345122	0.024168	0.749391	0.999539	0.483135	0.795883
BAZ2A	sp|Q9UIF9|BAZ2A-HUMAN	0.591097	0.194262	-0.292776	1.48721	0.823076	0.74565	0.792727
ZC3H3	sp|Q8IXZ2|ZC3H3-HUMAN	0.41518	0.0476039	-0.00676591	0.872602	0.996323	0.525515	0.790045
CDC23	sp|Q9UJX2|CDC23-HUMAN	0.61656	0.231675	-0.334382	1.57709	0.786776	0.780664	0.789789
DOT1L	sp|Q8TEK3|DOT1L-HUMAN	0.547505	0.144238	-0.197788	1.29447	0.883237	0.693668	0.78929
ZKSCAN3	sp|Q9BRR0|ZKSC3-HUMAN	0.437738	0.0597119	-0.0419154	0.931571	0.989303	0.558234	0.784148
RPL3	sp|P39023|RL3-HUMAN	0.346508	0.0236025	0.0466053	0.65138	0.999989	0.443369	0.781533
NCOR1	tr|A0A024RD47|A0A024RD47-HUMAN	0.323146	0.0178572	0.0649798	0.580768	1	0.413531	0.781431
MAGEA1	sp|P43355|MAGA1-HUMAN	0.461142	0.0743749	-0.0845162	0.99289	0.975916	0.591396	0.779751
IDE	sp|P14735|IDE-HUMAN	0.467588	0.0796065	-0.0818618	1.03323	0.97042	0.603408	0.774912
RPS27A	sp|P62979|RS27A-HUMAN	0.702602	0.407492	-0.544	1.97261	0.675527	0.908553	0.77332
UTP18	sp|Q9Y5J1|UTP18-HUMAN	0.512846	0.116951	-0.165326	1.19629	0.922845	0.66683	0.769081
ATP2A2	tr|A0A0S2Z3L2|A0A0S2Z3L2-HUMAN	0.298851	0.0135523	0.0676316	0.528148	1	0.38954	0.76719
ARAF	tr|A0A0S2Z3F2|A0A0S2Z3F2-HUMAN	0.273448	0.00953654	0.0813681	0.464523	1	0.357125	0.765692
WBP2	tr|A0A024R8L1|A0A024R8L1-HUMAN	0.430672	0.0587549	-0.0453048	0.919828	0.990582	0.562828	0.765193
FAM83B	sp|Q5T0W9|FA83B-HUMAN	0.543141	0.149014	-0.242689	1.28946	0.881663	0.710724	0.764208
OSBPL7	tr|Q8WXP9|Q8WXP9-HUMAN	0.505425	0.112501	-0.17782	1.17451	0.929827	0.663623	0.761615
SCL	tr|Q9NY94|Q9NY94-HUMAN	0.46981	0.0842574	-0.111603	1.06085	0.966115	0.617848	0.760397
CENPC	sp|Q03188|CENPC-HUMAN	0.427015	0.0576308	-0.0443829	0.910881	0.991502	0.562191	0.759554
RPS29	sp|P62273-2|RS29-HUMAN	0.460359	0.0782248	-0.0790048	1.03342	0.973162	0.607541	0.757741
PIK3C2A	sp|O00443|P3C2A-HUMAN	0.27462	0.00994467	0.0779087	0.473797	1	0.363131	0.756257
CEP164	sp|Q9UPV0|CE164-HUMAN	0.413658	0.0513171	-0.042937	0.860399	0.995178	0.547633	0.755356
RPL28	sp|P46779|RL28-HUMAN	0.426353	0.0584128	-0.0463967	0.904561	0.99119	0.566872	0.752116
POLR3B	sp|Q9NW08|RPC2-HUMAN	0.298442	0.0140253	0.0640601	0.527818	1	0.396822	0.75208
LDLRAP1	sp|Q5SW96|ARH-HUMAN	0.516833	0.126227	-0.194006	1.22494	0.913066	0.687426	0.751838
DEUP1	sp|Q05D60|DEUP1-HUMAN	0.441567	0.0673271	-0.0903522	0.956507	0.984308	0.587622	0.751447
TBL1XR1	sp|Q9BZK7|TBL1R-HUMAN	0.383024	0.0381234	-0.00577957	0.772879	0.999211	0.509765	0.751374
UBLCP1	sp|Q8WVY7|UBCP1-HUMAN	0.317627	0.0183227	0.0411809	0.583469	1	0.426165	0.745315
PML	sp|P29590-2|PML-HUMAN	0.43979	0.0677906	-0.0974423	0.961297	0.984286	0.592024	0.742858
	tr|B4E2S4|B4E2S4-HUMAN	0.363194	0.0315385	0.0223932	0.726444	0.999832	0.48897	0.742774
	tr|B3KN94|B3KN94-HUMAN	0.465668	0.0853255	-0.139331	1.04025	0.966318	0.627282	0.742358
RHOT2	sp|Q8IXI1|MIRO2-HUMAN	0.427425	0.0606887	-0.064133	0.940731	0.989943	0.57636	0.741594
RFWD2	sp|Q8NHY2|RFWD2-HUMAN	0.562283	0.181855	-0.303997	1.40739	0.847532	0.758416	0.741391
SETD1B	sp|Q9UPS6|SET1B-HUMAN	0.425874	0.060132	-0.0735353	0.901199	0.990391	0.5758	0.739621
USP22	sp|Q9UPT9|UBP22-HUMAN	0.420193	0.0570815	-0.0504824	0.912677	0.992384	0.56859	0.739009
CEP290	sp|O15078|CE290-HUMAN	0.22625	0.0047999	0.0906057	0.361768	1	0.306216	0.738858
ERCC2	sp|P18074|ERCC2-HUMAN	0.367658	0.0336457	-0.00122288	0.731216	0.999717	0.498908	0.736925
RMND5B	sp|Q96G75|RMD5B-HUMAN	0.451786	0.0769511	-0.113	1.01017	0.975937	0.614009	0.735797
TBC1D13	tr|A0A024R8C8|A0A024R8C8-HUMAN	0.409092	0.0524624	-0.0399576	0.884673	0.995058	0.55989	0.730664
MRPL44	sp|Q9H9J2|RM44-HUMAN	0.503152	0.120247	-0.212644	1.21352	0.924036	0.689188	0.730065
EFR3A	tr|A0A1B0GUZ7|A0A1B0GUZ7-HUMAN	0.513853	0.131274	-0.202472	1.25019	0.91015	0.7051	0.728767
C9orf64	sp|Q5T6V5|CI064-HUMAN	0.627322	0.291628	-0.436247	1.7034	0.753646	0.860843	0.72873
HYOU1	sp|Q9Y4L1|HYOU1-HUMAN	0.488811	0.10754	-0.195024	1.14839	0.940478	0.670879	0.728613
FLJ10292	tr|A0A023T6R1|A0A023T6R1-HUMAN	0.394713	0.0457425	-0.0379446	0.821248	0.997673	0.541849	0.728455
EIF2S1	tr|Q53XC0|Q53XC0-HUMAN	0.377839	0.0384782	-0.00220755	0.770151	0.999242	0.519159	0.72779
SRRM1	tr|A0A0S2Z4Z6|A0A0S2Z4Z6-HUMAN	0.664286	0.368768	-0.498711	1.92164	0.706745	0.914159	0.726664
	tr|B3KPM6|B3KPM6-HUMAN	0.347707	0.0277175	0.0037617	0.689896	0.999955	0.47881	0.726189
RPL35	sp|P42766|RL35-HUMAN	0.448826	0.0774206	-0.10303	1.00423	0.976198	0.619941	0.723982
TAF9	sp|Q16594|TAF9-HUMAN	0.547996	0.172502	-0.284008	1.37323	0.86167	0.757914	0.723032
LOH11CR2A	tr|A0A024R3H3|A0A024R3H3-HUMAN	0.649343	0.340796	-0.480646	1.78338	0.723608	0.899028	0.722273
MYH3	sp|P11055|MYH3-HUMAN	0.689651	0.434422	-0.674927	1.97789	0.67595	0.955711	0.72161
ARPC5L	tr|A0A024R897|A0A024R897-HUMAN	0.420867	0.0603498	-0.0724615	0.890519	0.990799	0.583705	0.721028
	tr|A8K910|A8K910-HUMAN	0.426153	0.0634876	-0.112098	0.902748	0.988621	0.591261	0.720753
SMAD4	sp|Q13485|SMAD4-HUMAN	0.438646	0.0715311	-0.102274	0.994712	0.982087	0.609724	0.719417
RMND5A	sp|Q9H871|RMD5A-HUMAN	0.441254	0.0733491	-0.0959736	0.979688	0.980448	0.613774	0.718919
GPSM2	sp|P81274|GPSM2-HUMAN	0.456845	0.0844126	-0.0300901	0.920781	0.969221	0.635967	0.718347
UBE3A	sp|Q05086|UBE3A-HUMAN	0.630001	0.306422	-0.456132	1.73269	0.746446	0.878656	0.717006
PHKG2	tr|J3KNN3|J3KNN3-HUMAN	0.433826	0.0690069	-0.0783087	0.951269	0.98443	0.605523	0.716448
RBM19	sp|Q9Y4C8|RBM19-HUMAN	0.673291	0.401926	-0.574546	1.9257	0.692687	0.941608	0.715044
[truncated: 2,754 more rows]
