# Supplementary material for: Systematic identification of cancer cell vulnerabilities to natural killer cell-mediated immune surveillance
Source: eLife. 2019 Aug 27;8:e47362. doi: 10.7554/eLife.47362 (PMC6713475; doi:10.7554/eLife.47362)
Supplement: Supplementary file 6. [file elife-47362-supp6.xlsx]

## Sheet: Sheet1
gRNA name	Protospacer sequence	Gene target
EGFP #1	GGCCACAAGTTCAGCGTGTC	EGFP
MLH1 #1	CTTCACTGAGTAGTTTGCAT	MLH1
MSH2 #1	TCAAACTGAGAGAGATTGCC	MSH2
MSH6 #1	GCCAGGGCCTCACGCGAAGG	MSH6
PSM2 #1	GTAAGTTGCACCAATCAGCT	PSM2
DCAF15 #1	GCTGCACACCAAGTACCAGG	DCAF15
DCAF15 #2	TGACATCTACGTCAGCACCG	DCAF15
DCAF15 #3	GCAGCTTCCGGAAGAGGCGA	DCAF15
PTPN2 #1	CCATGACTATCCTCATAGAG	PTPN2
PTPN2 #2	CCGCGACTCACCAAGTACAG	PTPN2
Nectin2 #1	GCCCGAAGCCTGGCAGCGAG	NECTIN2
Nectin2 #2	AGTTTGCCACCTTCCCCAAG	NECTIN2
Control	AGAAGATGTCAACCAAGGAG	OR1a1 (olfactory receptor)
ICAM #1	GTTTCAGCTCCTTCTCCCCA	ICAM1
STAT1 #1	GATCATTTACAGCTGTCTGA	STAT1
