# Supplementary material for: Systematic identification of cancer cell vulnerabilities to natural killer cell-mediated immune surveillance
Source: eLife. 2019 Aug 27;8:e47362. doi: 10.7554/eLife.47362 (PMC6713475; doi:10.7554/eLife.47362)
Supplement: Supplementary file 7. [file elife-47362-supp7.xlsx]

## Sheet: Sheet1
Round 1 PCR primers-- "A" set
Name	Sequence
FWD_A_s1	CACTCTTTCCCTACACGACGCTCTTCCGATCTttgtgGAAAGGACGAAACACC
FWD_A_s2	CACTCTTTCCCTACACGACGCTCTTCCGATCTattgtgGAAAGGACGAAACACC
FWD_A_s3	CACTCTTTCCCTACACGACGCTCTTCCGATCTgattgtgGAAAGGACGAAACACC
FWD_A_s4	CACTCTTTCCCTACACGACGCTCTTCCGATCTcgattgtgGAAAGGACGAAACACC
FWD_A_s5	CACTCTTTCCCTACACGACGCTCTTCCGATCTtcgattgtgGAAAGGACGAAACACC
FWD_A_s6	CACTCTTTCCCTACACGACGCTCTTCCGATCTatcgattgtgGAAAGGACGAAACACC
FWD_A_s7	CACTCTTTCCCTACACGACGCTCTTCCGATCTgatcgattgtgGAAAGGACGAAACACC
FWD_A_s8	CACTCTTTCCCTACACGACGCTCTTCCGATCTcgatcgattgtgGAAAGGACGAAACACC
FWD_A_s9	CACTCTTTCCCTACACGACGCTCTTCCGATCTacgatcgattgtgGAAAGGACGAAACACC	(N.B. Sets of 9 staggered primers pooled prior to PCR)
REV_A_s1	GGAGTTCAGACGTGTGCTCTTCCGATCTtAACTTCCTTGTCATCGTCGTCC
REV_A_s2	GGAGTTCAGACGTGTGCTCTTCCGATCTatAACTTCCTTGTCATCGTCGTCC
REV_A_s3	GGAGTTCAGACGTGTGCTCTTCCGATCTgatAACTTCCTTGTCATCGTCGTCC
REV_A_s4	GGAGTTCAGACGTGTGCTCTTCCGATCTcgatAACTTCCTTGTCATCGTCGTCC
REV_A_s5	GGAGTTCAGACGTGTGCTCTTCCGATCTtcgatAACTTCCTTGTCATCGTCGTCC
REV_A_s6	GGAGTTCAGACGTGTGCTCTTCCGATCTatcgatAACTTCCTTGTCATCGTCGTCC
REV_A_s7	GGAGTTCAGACGTGTGCTCTTCCGATCTgatcgatAACTTCCTTGTCATCGTCGTCC
REV_A_s8	GGAGTTCAGACGTGTGCTCTTCCGATCTcgatcgatAACTTCCTTGTCATCGTCGTCC
REV_A_s9	GGAGTTCAGACGTGTGCTCTTCCGATCTacgatcgatAACTTCCTTGTCATCGTCGTCC	(N.B. Sets of 9 staggered primers pooled prior to PCR)
Round 1 PCR primers-- "B" set.
Name	Sequence
FWD_B_S1	GGAGTTCAGACGTGTGCTCTTCCGATCTtTGTGGAAAGGACGAAACACC
FWD_B_S2	GGAGTTCAGACGTGTGCTCTTCCGATCTatTGTGGAAAGGACGAAACACC
FWD_B_S3	GGAGTTCAGACGTGTGCTCTTCCGATCTgatTGTGGAAAGGACGAAACACC
FWD_B_S4	GGAGTTCAGACGTGTGCTCTTCCGATCTcgatTGTGGAAAGGACGAAACACC
FWD_B_S5	GGAGTTCAGACGTGTGCTCTTCCGATCTtcgatTGTGGAAAGGACGAAACACC
FWD_B_S6	GGAGTTCAGACGTGTGCTCTTCCGATCTatcgatTGTGGAAAGGACGAAACACC
FWD_B_S7	GGAGTTCAGACGTGTGCTCTTCCGATCTgatcgatTGTGGAAAGGACGAAACACC
FWD_B_S8	GGAGTTCAGACGTGTGCTCTTCCGATCTcgatcgatTGTGGAAAGGACGAAACACC
FWD_B_S9	GGAGTTCAGACGTGTGCTCTTCCGATCTacgatcgatTGTGGAAAGGACGAAACACC	(N.B. Sets of 9 staggered primers pooled prior to PCR)
REV_B_S1	CACTCTTTCCCTACACGACGCTCTTCCGATCTtAACTTCCTTGTCATCGTCGTCC
REV_B_S2	CACTCTTTCCCTACACGACGCTCTTCCGATCTatAACTTCCTTGTCATCGTCGTCC
REV_B_S3	CACTCTTTCCCTACACGACGCTCTTCCGATCTgatAACTTCCTTGTCATCGTCGTCC
REV_B_S4	CACTCTTTCCCTACACGACGCTCTTCCGATCTcgatAACTTCCTTGTCATCGTCGTCC
REV_B_S5	CACTCTTTCCCTACACGACGCTCTTCCGATCTtcgatAACTTCCTTGTCATCGTCGTCC
REV_B_S6	CACTCTTTCCCTACACGACGCTCTTCCGATCTatcgatAACTTCCTTGTCATCGTCGTCC
REV_B_S7	CACTCTTTCCCTACACGACGCTCTTCCGATCTgatcgatAACTTCCTTGTCATCGTCGTCC
REV_B_S8	CACTCTTTCCCTACACGACGCTCTTCCGATCTcgatcgatAACTTCCTTGTCATCGTCGTCC
REV_B_S9	CACTCTTTCCCTACACGACGCTCTTCCGATCTacgatcgatAACTTCCTTGTCATCGTCGTCC	(N.B. Sets of 9 staggered primers pooled prior to PCR)
Round 2 PCR primers
Forward_RD2	AATGATACGGCGACCACCGAGATCTACACNNNNNNNNACACTCTTTCCCTACACGACG	N.B. NNNNNNNN represents i5 index barcode
Reverse_RD2	CAAGCAGAAGACGGCATACGAGATNNNNNNNNGTGACTGGAGTTCAGACGTGTGCTC	N.B. NNNNNNNN represents i7 index barcode
