# Supplementary material for: Systematic identification of cancer cell vulnerabilities to natural killer cell-mediated immune surveillance
Source: eLife. 2019 Aug 27;8:e47362. doi: 10.7554/eLife.47362 (PMC6713475; doi:10.7554/eLife.47362)
Supplement: Supplementary file 8. [file elife-47362-supp8.xlsx]

## Sheet: Sheet1
Protein	Conjugate	Species	Clone	Supplier & Catolog ID	Application
B7H6/NCR3LG1	APC	mouse	875001	R&D Systems fab7144a	flow cytometry
CD107A	APC	mouse	h4a3	Biolegend 328620	flow cytometry
CD25	APC	mouse	BC96	Biolegend 302609	flow cytometry
CD28	APC	mouse	28.2	Life Technologies LS17028941	flow cytometry
CD3	AF488	mouse	UCHT1	Biolegend 300454	flow cytometry
CD40	AF647	mouse	5C3	Biolegend 334311	flow cytometry
CD56	BV421	mouse	ncam16.2	BD Biosciences 562752	flow cytometry
CD58	AF647	mouse	IC3 (AICD58.6)	BD Pharmigen 563567	flow cytometry
CD69	PE	mouse	FN50	Biolegend 310905	flow cytometry
CD80	APC	mouse	2d10	Biolegend 305220	flow cytometry
CD80	none	mouse	2d10	Biolegend 305212	Blocking experiments
CD83	APC	mouse	HB15E	Biolegend 305311	flow cytometry
CTLA4	APC	mouse	BNI3	BD Biosciences 560938	flow cytometry
CUL4A	none	rabbit	polyclonal	Cell Signalling Technology 2699s	western blot
DDB1	none	rabbit	epr6089	Abcam ab109027	western blot
FLAG	none	mouse	M2	Sigma f1804	western blot, immunoprecipitation
GAPDH	none	rabbit	d16h11	Cell Signalling Technology 5174	western blot
HA	none	mouse	HA-7	Sigma h9658	western blot
HLA A,B,C	APC	mouse	w6/32	Biolegend 311410	flow cytometry
HLA-DR	AF647	mouse	L243	Biolegend 307621	flow cytometry
ICAM1	APC	mouse	ha58	ebioscience/fisher, 17-0549-42	flow cytometry
IFNGR-alpha subunit	none	mouse	gir-94	BD Biosciences 558935	western blot, flow cytometry
MLH1	none	mouse	G168-728	BD Biosciences 554073	western blot
mouse IgG1k	none	mouse	MOPC-21	Biolegend 400124	Blocking experiments
MSH2	non	mouse	Fe11	Thermo Fisher, 33-7900	western blot
MSH6	none	mouse	clone 44	BD Biosciences 610918	western blot
NECTIN2	APC	mouse	TX31	Biolegend 337412	flow cytometry
p-STAT1, tyr701	none	rabbit	58d6	Cell Signalling Technology 9167	western blot
PMS2	none	rabbit	EPR3947	Abcam ab110638	western blot
PTPN2	none	rabbit	polyclonal	Abcam ab180764	western blot
RBM39	none	rabbit	polyclonal	Bethyl Labs A300-291A	western blot
SMC1	none	rabbit	polyclonal	Bethyl Labs A300-055A-M	western blot
SMC3	none	rabbit	polyclonal	Bethyl Labs A300-060A-M	western blot
STAT1	none	rabbit	polyclonal	Cell Signalling Technology 9172	western blot
Streptavidin	HRP	n/a	n/a	Jackson Labs 016-030-084	western blot
TUBULIN	none	mouse	DM1A	Sigma T9026	western blot
ULBP2/5/6	APC	mouse	c165903	R&D Systems fab1298A	flow cytometry
V5	none	mouse		Invitrogen R960-25	western blot
