# Supplementary figures and images for: Systematic identification of cancer cell vulnerabilities to natural killer cell-mediated immune surveillance
Source: eLife journal article supplement (doi:10.7554/elife.47362), 2019-08-26

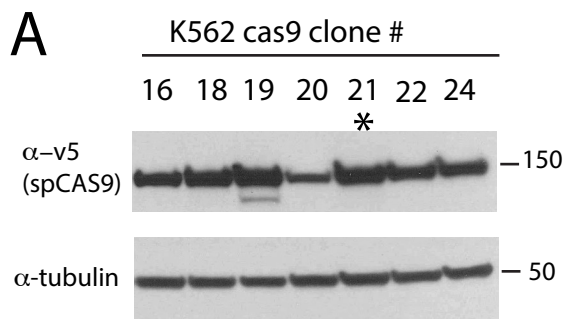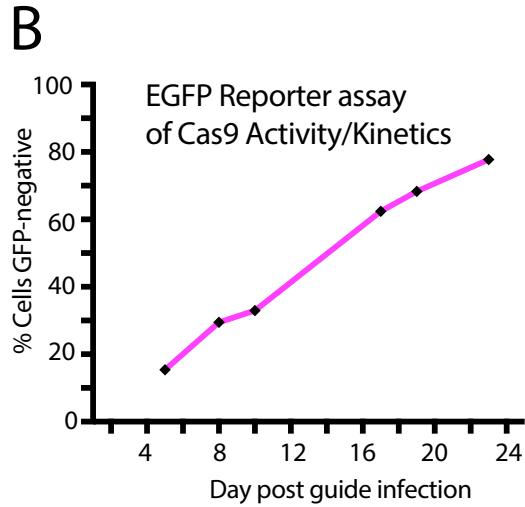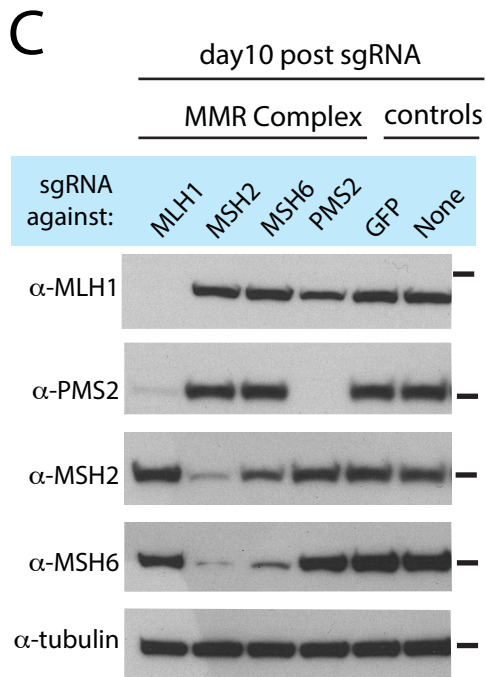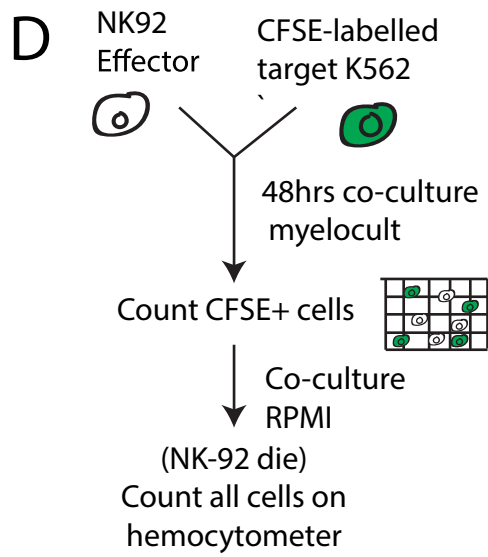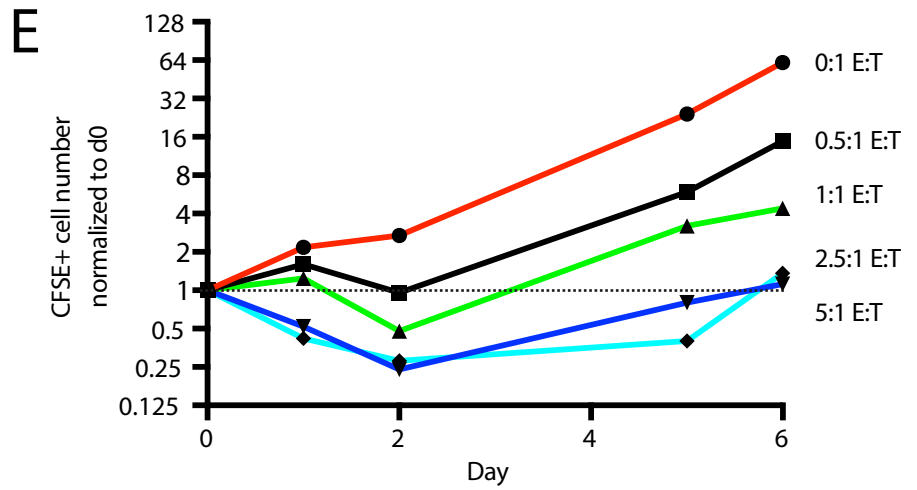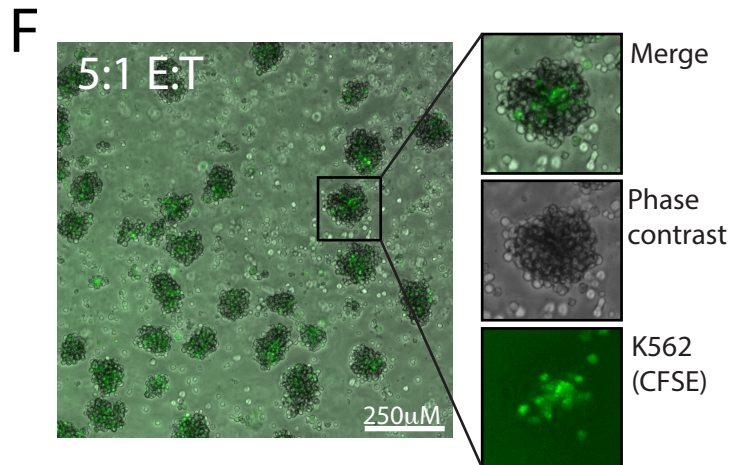

Supplement: supp [file elife_poa_e47362_Figure_1_figure_supplement_1.pdf › elife_poa_e47362_Figure_1_figure_supplement_1.pdf]

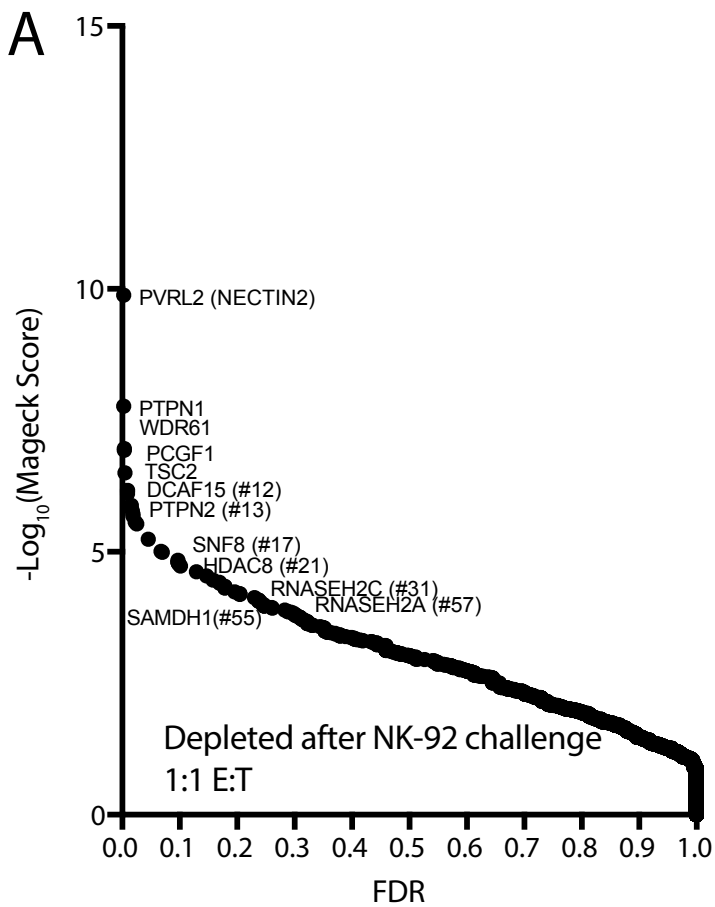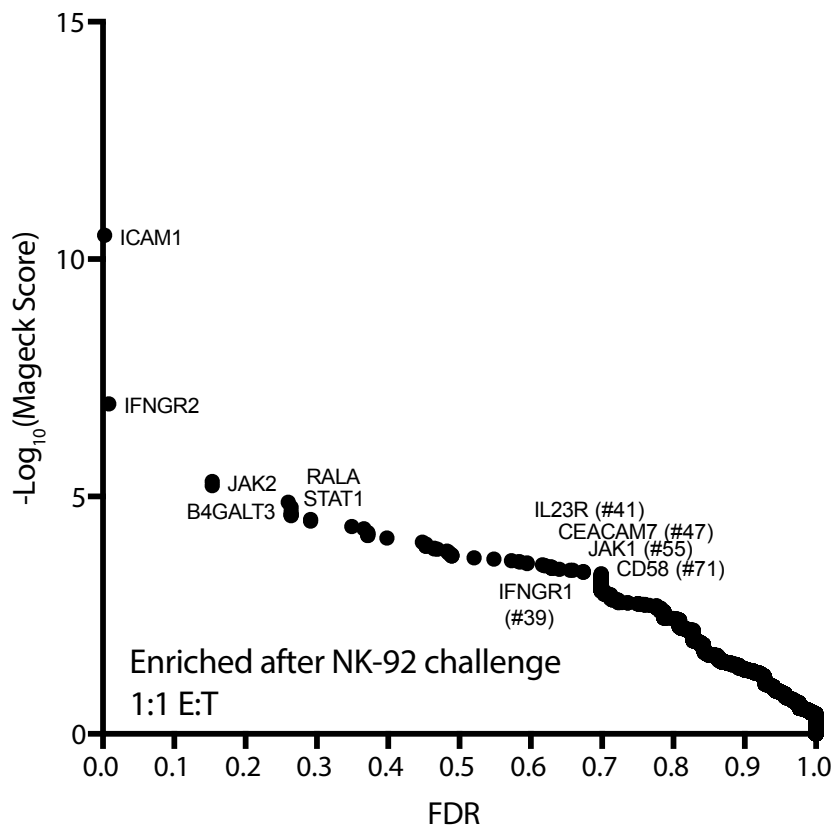

Supplement: supp [file elife_poa_e47362_Figure_1_figure_supplement_2.pdf › elife_poa_e47362_Figure_1_figure_supplement_2.pdf]

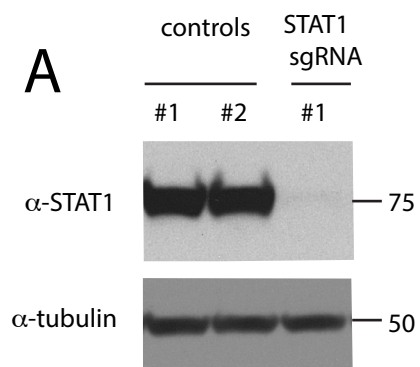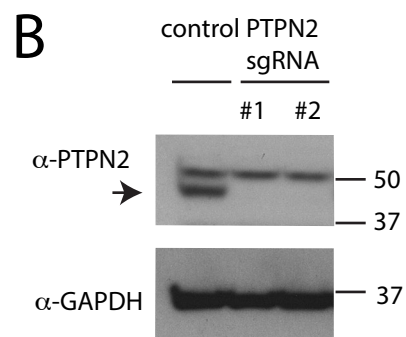

Supplement: supp [file elife_poa_e47362_Figure_2_figure_supplement_1.pdf › elife_poa_e47362_Figure_2_figure_supplement_1.pdf]

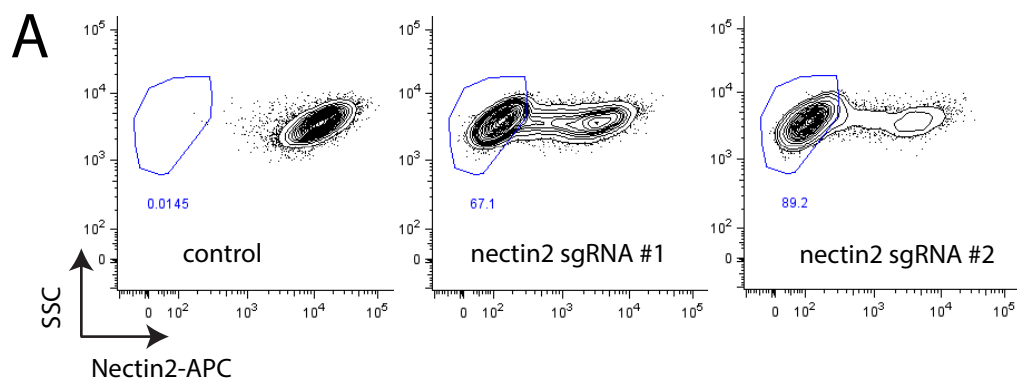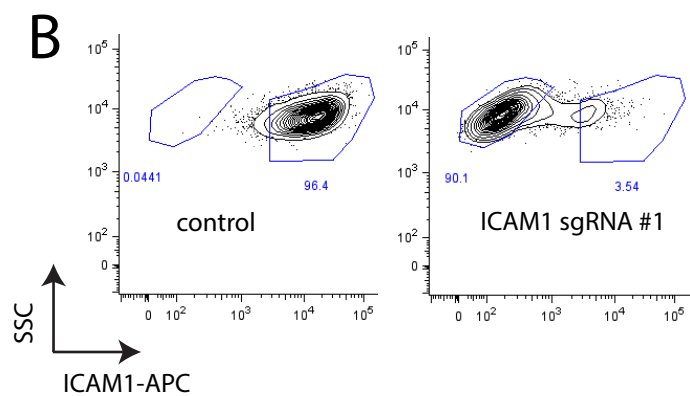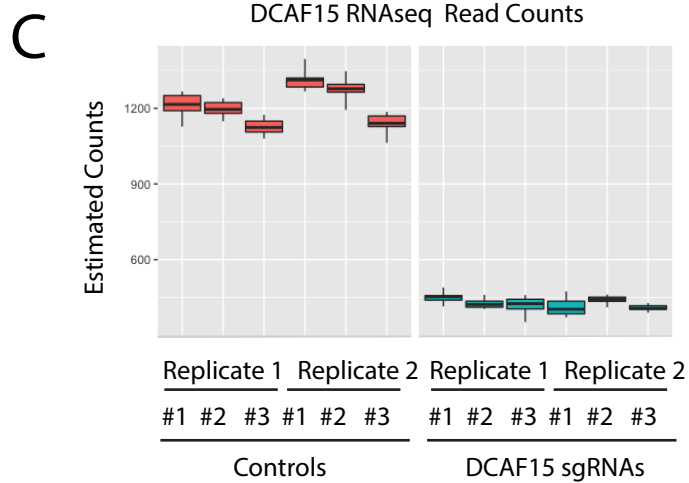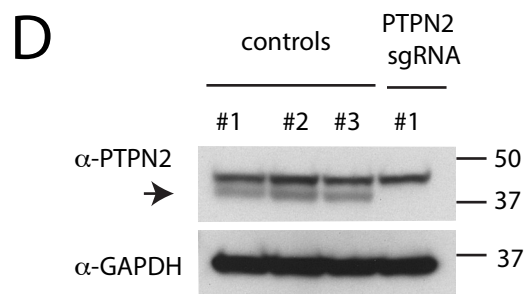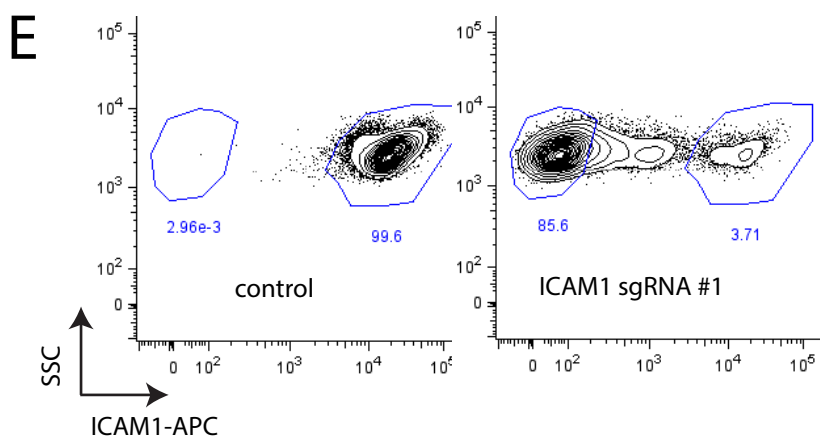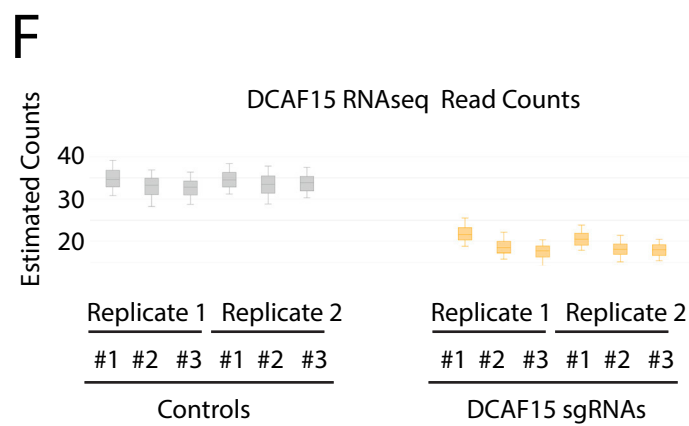

Supplement: supp [file elife_poa_e47362_Figure_3_figure_supplement1.pdf › elife_poa_e47362_Figure_3_figure_supplement1.pdf]

A

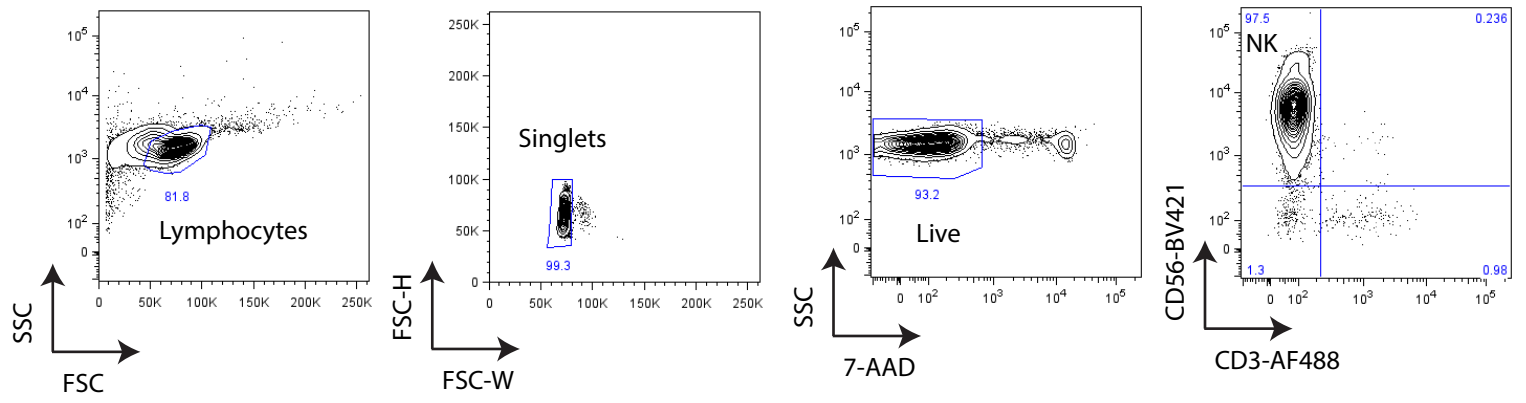

B

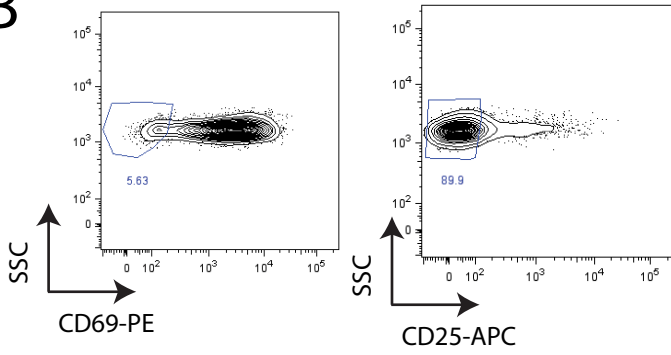

Supplement: supp [file elife_poa_e47362_Figure_3_figure_supplement_2.pdf › elife_poa_e47362_Figure_3_figure_supplement_2.pdf]

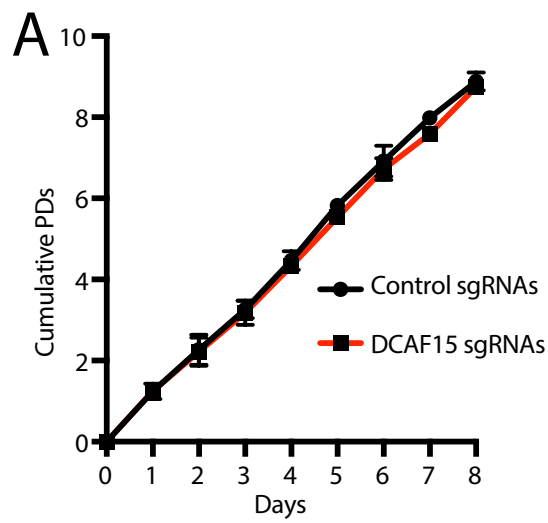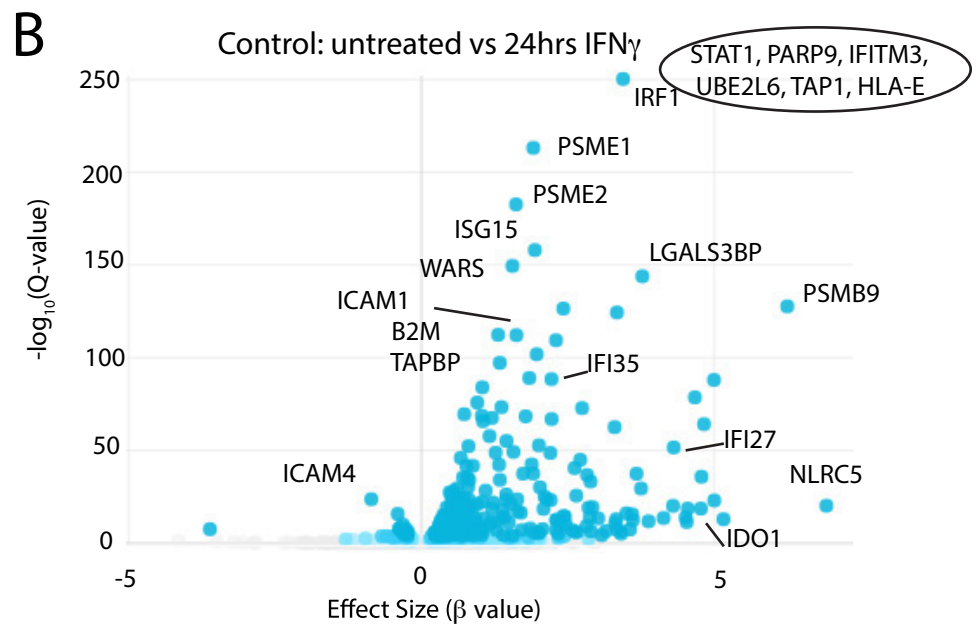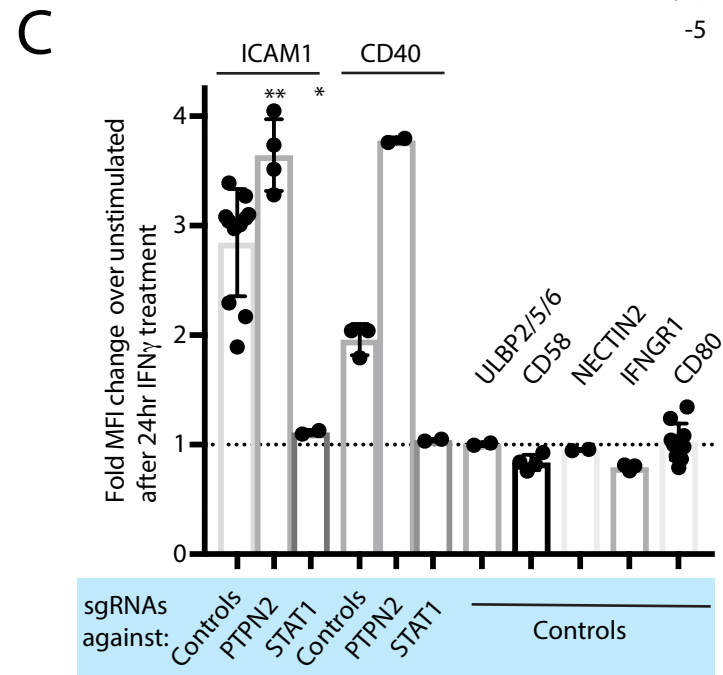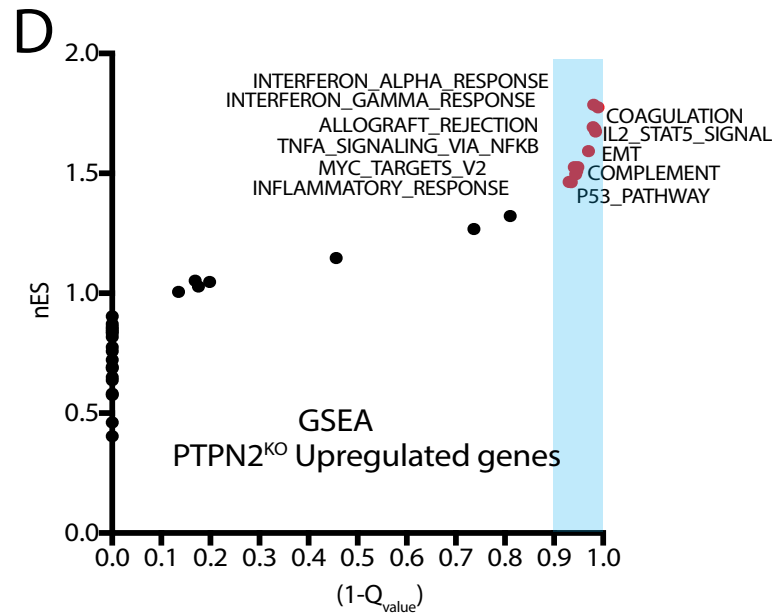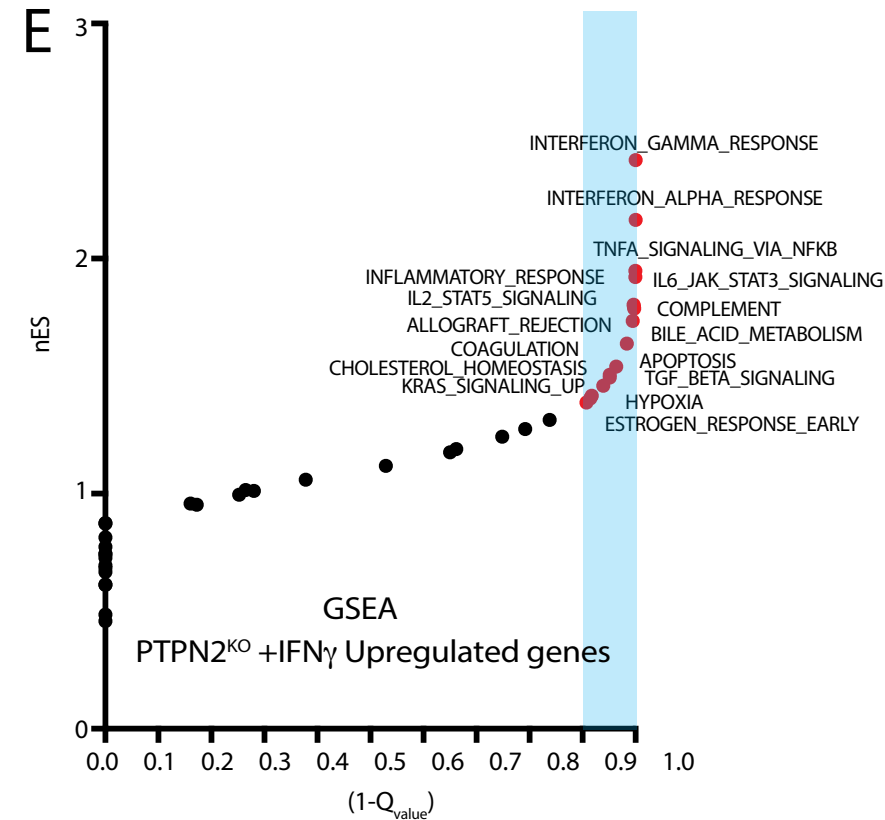

Supplement: supp [file elife_poa_e47362_Figure_4_figure_supplement_1.pdf › elife_poa_e47362_Figure_4_figure_supplement_1.pdf]

A

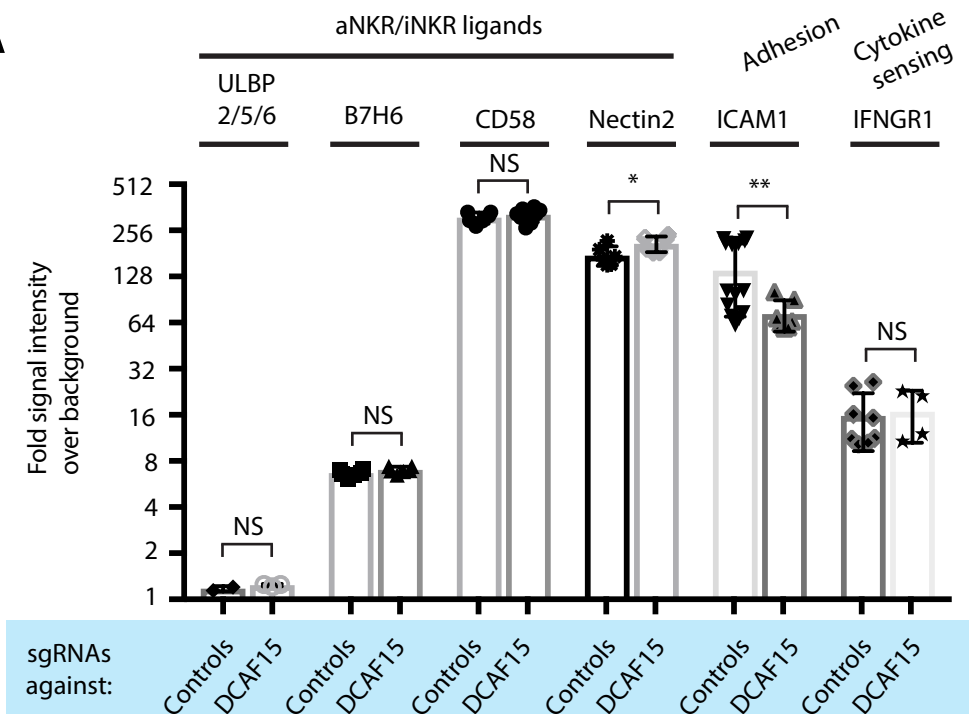

B

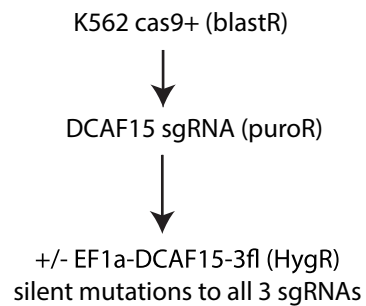

C

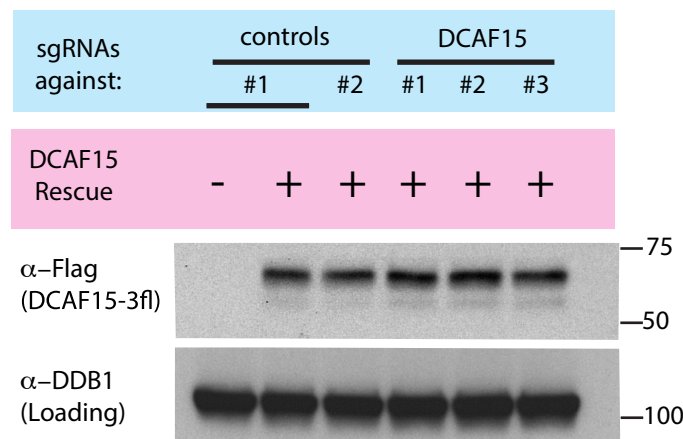

D

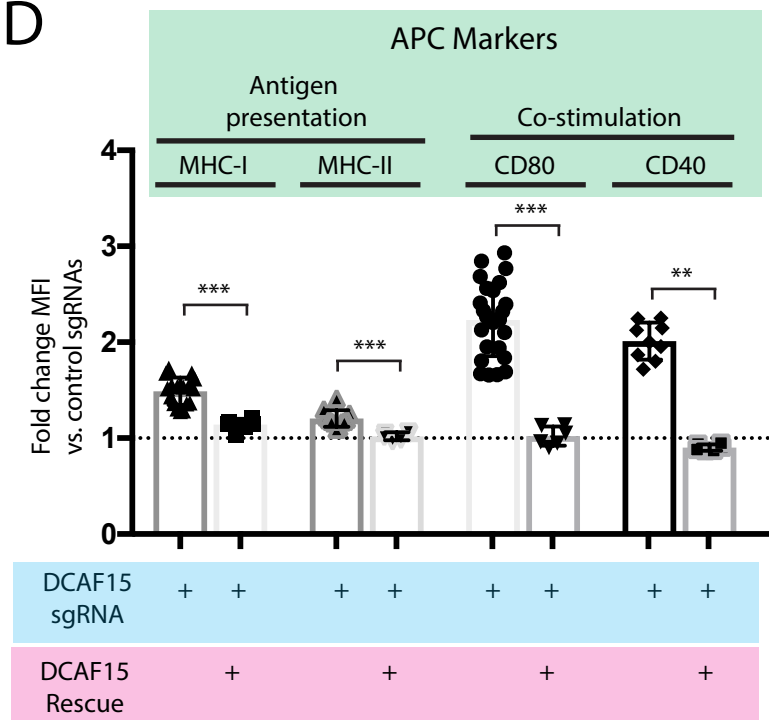

E

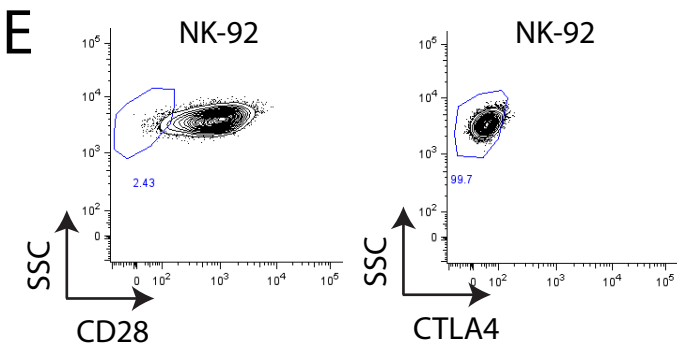

F

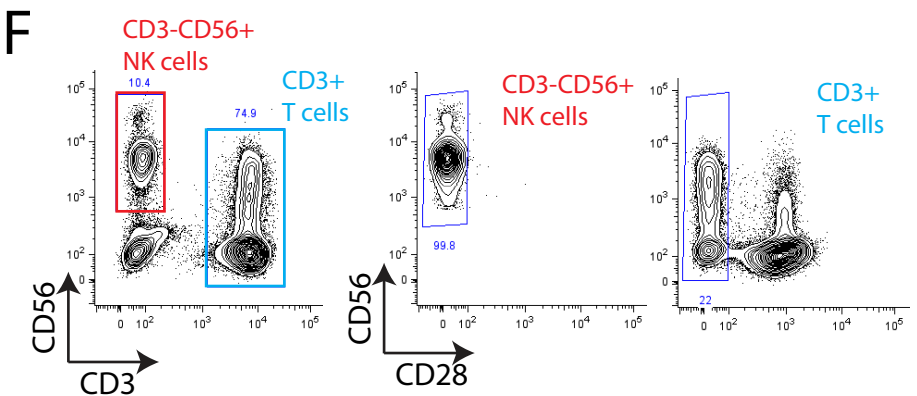

Supplement: supp [file elife_poa_e47362_Figure_5_figure_supplement_1.pdf › elife_poa_e47362_Figure_5_figure_supplement_1.pdf]

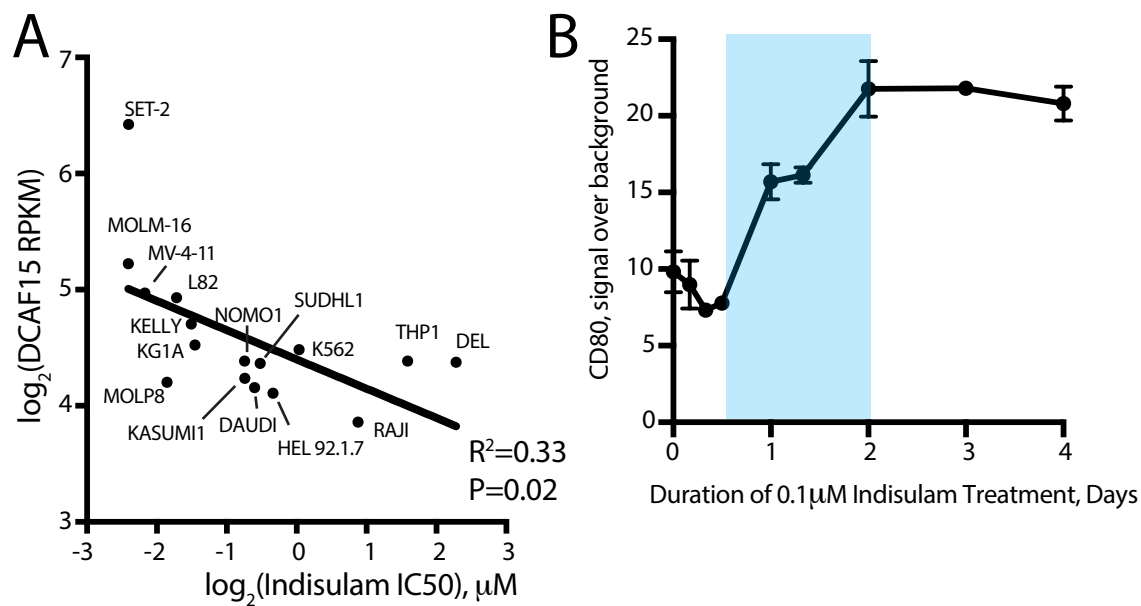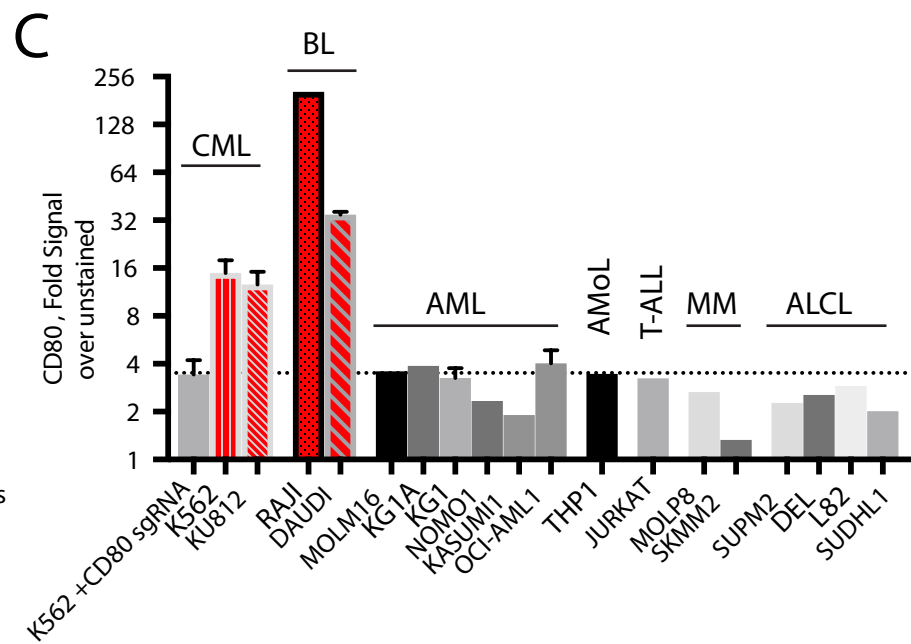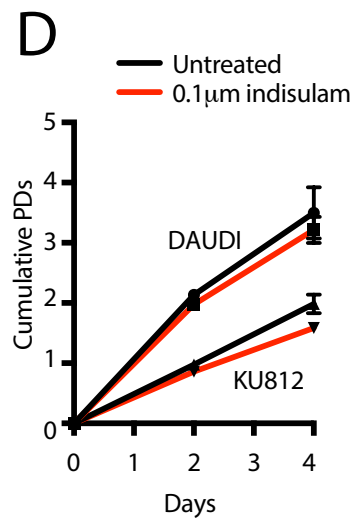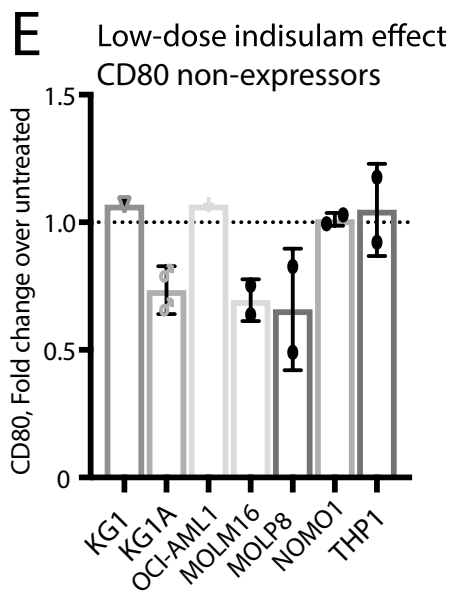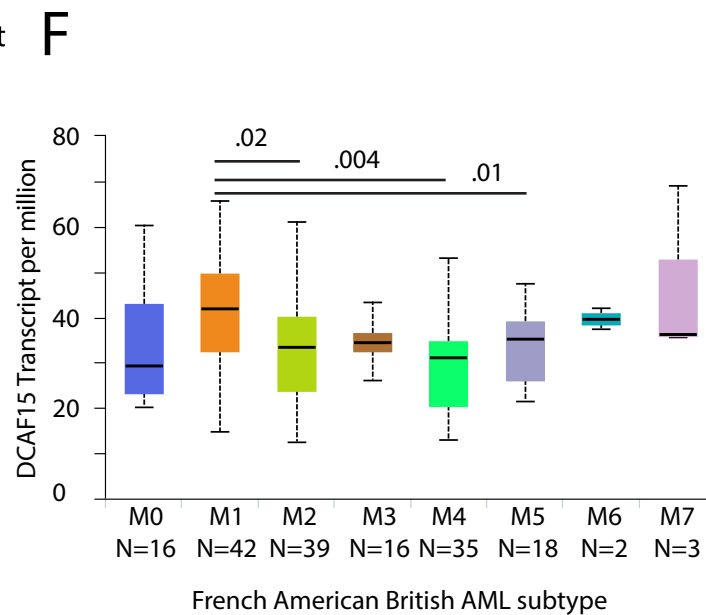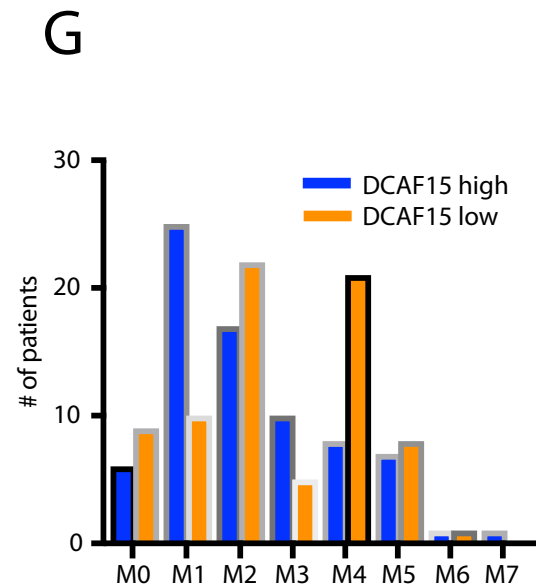

Supplement: supp [file elife_poa_e47362_Figure_6_figure_supplement_1.pdf › elife_poa_e47362_Figure_6_figure_supplement_1.pdf]

A

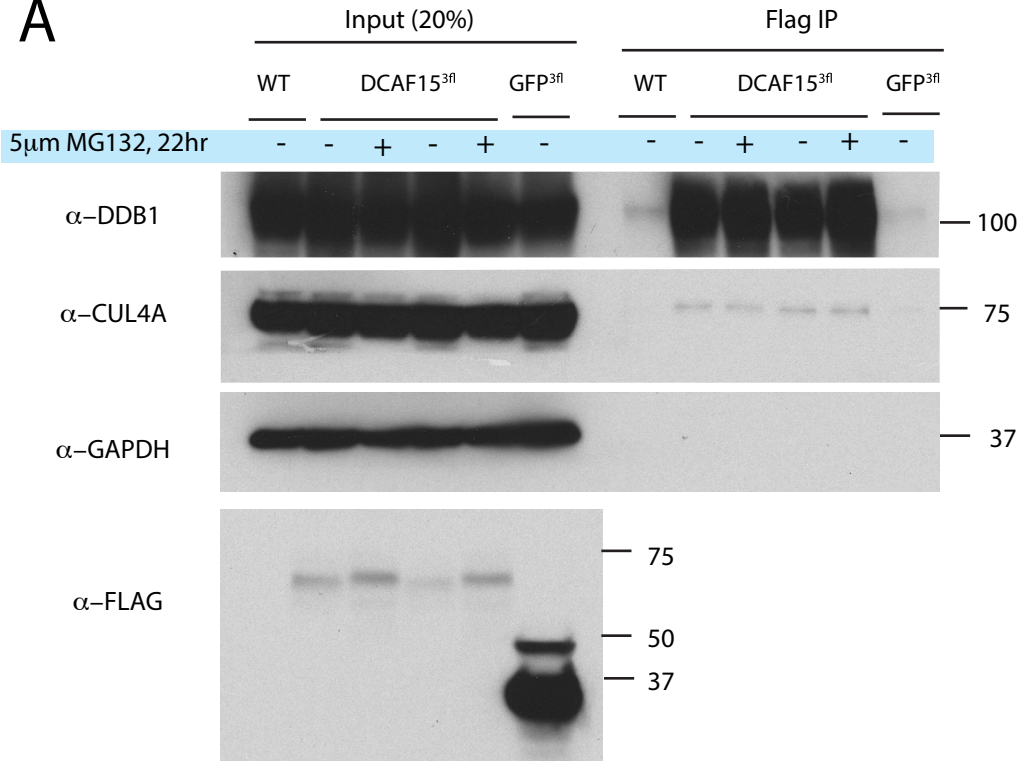

Supplement: supp [file elife_poa_e47362_Figure_7_figure_supplement_1.pdf › elife_poa_e47362_Figure_7_figure_supplement_1.pdf]
